# Supplementary material for: A catalyst-free cross-coupling of isocyanates and triarylboranes for secondary amide synthesis
Source: Royal Society of Chemistry journal article supplement (doi:10.1039/d3qo01617j), 2023-11-23
Supplement: d3qo01617j1.pdf [file d3qo01617j1.pdf]

## *Supplementary Information*

### **A catalyst-free cross-coupling of isocyanates and triarylboranes for secondary amide synthesis**

You-Wei Wu, Mu-Xiang Chen, Yan Li, Lu-Min Hu, Lili Zhao, Zhenhua Jia, Xuefei Zhao\* and  
Xu-Hong Hu\*

Institute of Advanced Synthesis, School of Chemistry and Molecular Engineering, Nanjing Tech  
University, Nanjing 211816, China

E-mail: xfzhao@njtech.edu.cn (to X.Z.); ias\_xhhu@njtech.edu.cn (to X.-H.H.)

### **Table of Contents**

|   |                                                                   |     |
|---|-------------------------------------------------------------------|-----|
| 1 | General methods                                                   | S2  |
| 2 | General procedure for the synthesis of the products <b>3a–3ah</b> | S4  |
| 3 | Scale-up synthesis of the product <b>3z</b>                       | S4  |
| 4 | Sequential modular synthesis of the products <b>3ai–3ak</b>       | S4  |
| 5 | Mechanistic exploration experiments                               | S6  |
|   | 5.1 Radical trapping experiments                                  | S6  |
|   | 5.2 Competition experiments                                       | S6  |
|   | 5.3 Control experiments                                           | S7  |
| 6 | NMR data of the products                                          | S10 |
| 7 | DFT calculations for the reaction mechanism                       | S21 |
| 8 | References                                                        | S28 |
| 9 | NMR spectra of the products                                       | S31 |

## 1. General methods

Experiments involving moisture and/or air sensitive components were performed in oven-dried glassware by using Schlenk line techniques with a four-port dual-bank manifold under a nitrogen atmosphere. Anhydrous solvents such as 1,2-dichloroethane, benzotrifluoride, chlorobenzene, chloroform, 1,1,2,2-tetrachloroethane, and 1,1,2-trichloroethane were purchased in a septum-sealed bottle with 4 Å molecular sieve beads. Triarylboranes including triphenylborane, tris(4-methylphenyl)borane, tris(2-methylphenyl) borane, tris(4-fluorophenyl)borane, tris(3,5-dimethylphenyl)borane, tri-1-naphthalenylborane, tributylborane and tribenzylborane, as well as all isocyanates used are commercial available, which were purchased from Energy-Chemical, Aladdin, J&K Scientific, Macklin, Adamas, Bidepharm, Heowns, Chemieliva, etc without further purification. Other triarylboranes were freshly prepared according to the literature reports.<sup>1</sup> Diphenylborinic acid was prepared according to the known procedure.<sup>2</sup>

Analytical thin layer chromatography (TLC) was performed using Merck 60 F254 precoated silica gel plate (0.2 mm thickness). Subsequent to elution, plates were visualized using UV radiation (254 nm) on Spectroline Model ENF-24061/F 254 nm. Further visualization was possible by staining with basic solution of potassium permanganate or acidic solution of ceric molybdate, followed by heating on a hot plate. Flash chromatography was performed using NUOTAI silica gel (200 – 300 mesh) with distilled solvents. Columns were typically packed as slurry and equilibrated with petroleum ether prior to use.

Proton nuclear magnetic resonance (<sup>1</sup>H NMR) and carbon nuclear magnetic resonance (<sup>13</sup>C NMR) spectroscopy were performed on a Bruker Advance 400 MHz and JEOL 400 MHz spectrometers. Chemical shifts for <sup>1</sup>H NMR spectra are reported as in units of parts per million (ppm) downfield from SiMe<sub>4</sub> ( $\delta$  0.0) and relative to the signal of chloroform-*d* ( $J = 7.264$ , singlet), methanol-*d*<sub>4</sub> ( $J = 3.310$ , quintet), and dimethylsulfoxide-*d*<sub>6</sub> ( $J = 2.500$ , quintet). Multiplicities were given as: s (singlet); d (doublet); t (triplet); q (quartet); dd (doublet of doublets); td (triplet of doublets); qd (quartet of doublets); m (multiplet), etc. The number of protons (n) for a given resonance is indicated by nH. Coupling constants are reported as a J value in Hz. Carbon nuclear magnetic resonance spectra (<sup>13</sup>C NMR) are reported as  $\delta$  in units of parts per million (ppm) downfield from SiMe<sub>4</sub> ( $\delta = 0.0$ ) and relative to the signal of chloroform-*d* ( $\delta = 77.16$ , triplet), methanol-*d*<sub>4</sub> ( $J = 49.00$ , septet), and dimethylsulfoxide-*d*<sub>6</sub> ( $J = 39.52$ , septet). To clarify the complete

signal assignments, “× number” indicates the multiple carbons due to the superposition of chemical shifts.

High resolution mass spectral analysis (HRMS) was performed on Water Q-TOF Premier mass spectrometer (Thermo Electron Corporation).

**Table S1** Reaction optimization<sup>a</sup>

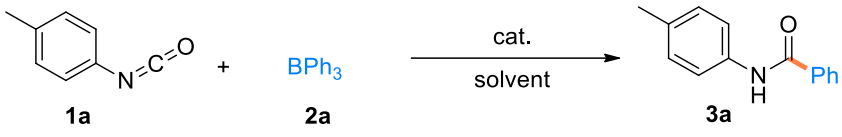

| Entry                 | Catalyst                                  | Solvent                                 | <i>t</i> (°C) | Time (h)  | Yield (%) <sup>b</sup> |
|-----------------------|-------------------------------------------|-----------------------------------------|---------------|-----------|------------------------|
| 1                     | Ni(cod) <sub>2</sub> , KO <sup>t</sup> Bu | CH <sub>2</sub> ClCH <sub>2</sub> Cl    | 120           | 24        | 20                     |
| 2                     | KO <sup>t</sup> Bu                        | CH <sub>2</sub> ClCH <sub>2</sub> Cl    | 120           | 24        | 21                     |
| 3                     | None                                      | CH <sub>2</sub> ClCH <sub>2</sub> Cl    | 120           | 24        | 53                     |
| 4                     | None                                      | PhCF <sub>3</sub>                       | 120           | 24        | 47                     |
| 5                     | None                                      | PhCl                                    | 120           | 24        | 24                     |
| 6                     | None                                      | CHCl <sub>3</sub>                       | 120           | 24        | 51                     |
| 7                     | None                                      | CHCl <sub>2</sub> CHCl <sub>2</sub>     | 120           | 24        | 51                     |
| 8                     | None                                      | CH <sub>2</sub> ClCHCl <sub>2</sub>     | 120           | 24        | 76                     |
| 9                     | None                                      | CH <sub>2</sub> ClCHCl <sub>2</sub>     | 120           | 16        | 84                     |
| 10                    | None                                      | CH <sub>2</sub> ClCHCl <sub>2</sub>     | 120           | 12        | 71                     |
| 11                    | None                                      | CH <sub>2</sub> ClCHCl <sub>2</sub>     | 110           | 16        | 72                     |
| 12                    | None                                      | CH <sub>2</sub> ClCHCl <sub>2</sub>     | 130           | 16        | 69                     |
| <b>13<sup>c</sup></b> | <b>None</b>                               | <b>CH<sub>2</sub>ClCHCl<sub>2</sub></b> | <b>120</b>    | <b>16</b> | <b>83</b>              |
| 14 <sup>d</sup>       | None                                      | CH <sub>2</sub> ClCHCl <sub>2</sub>     | 120           | 16        | 76                     |
| 15 <sup>c,e</sup>     | None                                      | CH <sub>2</sub> ClCHCl <sub>2</sub>     | 120           | 16        | 73                     |

<sup>a</sup> Unless other specified, reactions were conducted with **1a** (0.3 mmol), **2a** (0.36 mmol), and solvent (2.0 mL) under N<sub>2</sub> for 24 h. <sup>b</sup> Isolated yields. <sup>c</sup> 1.5 mL solvent was used. <sup>d</sup> 1.0 mL solvent was used. <sup>e</sup> The reaction was performed under air. cod = 1,5-cyclooctadiene. n.d. = not detected.

## 2. General procedure for the synthesis of the products 3a–3ah

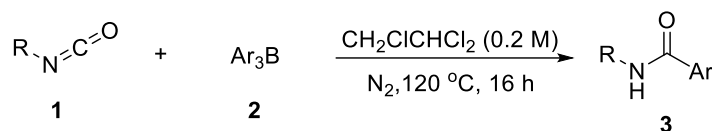

A 10 mL screw-capped Schlenk tube equipped with a stir bar was charged with isocyanate **1** (0.30 mmol, 1.0 equiv.), triarylborane **2** (0.36 mmol, 1.2 equiv.) and 1,1,2-trichloroethane (1.5 mL). The mixture was stirred at 120 °C in oil bath for 16 h under N<sub>2</sub> atmosphere. After full conversion, the reaction mixture was cooled down to room temperature, quenched with sat. aq. NaHCO<sub>3</sub> (10 mL), and then extracted with CH<sub>2</sub>Cl<sub>2</sub> (10 mL × 3). The combined organic layers were washed with sat. NaCl, dried over Na<sub>2</sub>SO<sub>4</sub> and concentrated under vacuum. The resultant residue was purified by flash column chromatography (petroleum ether/ethyl acetate) to give the corresponding amide **3a–3ah**.

## 3. Scale-up synthesis of the product 3z

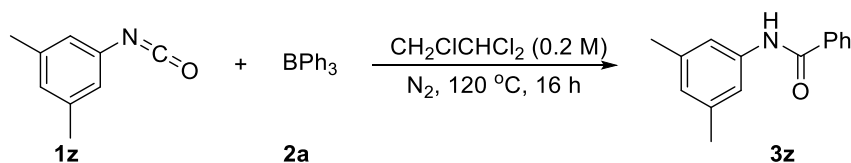

A 100 mL screw-capped Schlenk tube equipped with a stir bar was charged with 3,5-dimethylphenyl isocyanate **1z** (0.88 g, 6.0 mmol, 1.0 equiv.), triphenylborane **2a** (1.74 g, 7.2 mmol, 1.2 equiv.), and 1,1,2-trichloroethane (30 mL). The mixture was stirred at 120 °C in oil bath for 16 h under N<sub>2</sub> atmosphere. After full conversion, the reaction mixture was cooled down to room temperature, quenched with sat. aq. NaHCO<sub>3</sub> (50 mL), and then extracted with CH<sub>2</sub>Cl<sub>2</sub> (50 mL × 3). The combined organic layers were washed with sat. NaCl, dried over Na<sub>2</sub>SO<sub>4</sub> and concentrated under vacuum. The resultant residue was purified by flash column chromatography (petroleum ether/ethyl acetate = 20:1 – 12:1) to give **3z** (1.07 g, 4.75 mmol, 79%).

## 4. Sequential modular synthesis of the products 3ai–3ak<sup>3,4</sup>

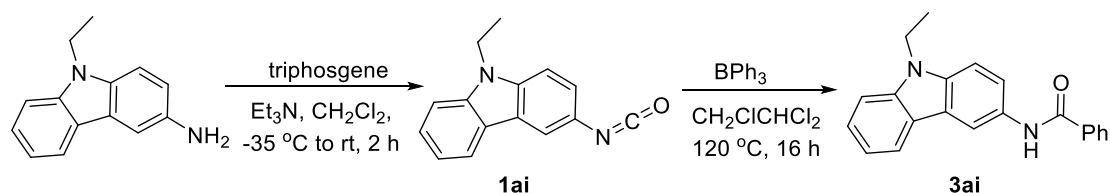

To a stirred CH<sub>2</sub>Cl<sub>2</sub> (1 mL) solution of triphosgene (0.1 mmol, 29.7 mg, 0.33 equiv.) was added

a CH<sub>2</sub>Cl<sub>2</sub> (0.5 mL) solution of 3-amino-9-ethylcarbazole (0.3 mmol, 63.1 mg, 1.0 equiv.) dropwise. After 30 min, the solution was cooled to -35 °C. Et<sub>3</sub>N (0.1 mL) was added dropwise. The mixture was warmed to room temperature slowly and stirred for 2 h. The mixture was concentrated under vacuum to give the isocyanate **1ai**, which was used in the next step immediately.

A 10 mL screw-capped Schlenk tube was charged with the above isocyanate **1ai**, triphenylborane (0.36 mmol, 87.2 mg, 1.2 equiv.), and 1,1,2-trichloroethane (1.5 mL). The mixture was stirred at 120 °C in oil bath for 16 h under N<sub>2</sub> atmosphere. After that, the reaction mixture was cooled down to room temperature, quenched with sat. aq. NaHCO<sub>3</sub> (10 mL), and then extracted with CH<sub>2</sub>Cl<sub>2</sub> (10 mL × 3). The combined organic layers were washed with sat. NaCl, dried over Na<sub>2</sub>SO<sub>4</sub> and concentrated under vacuum. The resultant residue was purified by flash column chromatography (petroleum ether/ethyl acetate = 20:1 – 10:1) to give the desired product **3ai** (73.2 mg, 0.233 mmol, 78% over two steps).

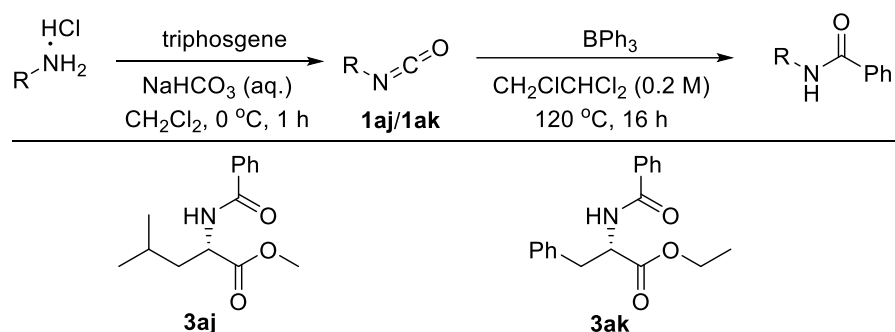

A 10 mL round-bottom flask was charged with amino acid ester hydrochloride (0.3 mmol, 1.0 equiv.), sat. aq. NaHCO<sub>3</sub> (1.2 mL) and CH<sub>2</sub>Cl<sub>2</sub> (1.2 mL). The solution was stirred at 0 °C for 20 min. Whereafter, triphosgene (0.1 mmol, 29.7 mg, 0.33 equiv.) was added into the solution. The mixture was stirred at 0 °C for 1 h. After that, the reaction mixture was warmed to room temperature and then extracted with CH<sub>2</sub>Cl<sub>2</sub> (10 mL × 3). The combined organic layers were washed with sat. NaCl, dried over Na<sub>2</sub>SO<sub>4</sub> and concentrated under vacuum to give the isocyanate **1aj** or **1ak**, which was used in the next step immediately.

A 10 mL screw-capped Schlenk tube equipped with a stir bar was charged with the above isocyanate **1aj** or **1ak**, triphenylborane (0.36 mmol, 87.2 mg, 1.2 equiv.), and 1,1,2-trichloroethane (1.5 mL). The mixture was stirred at 120 °C in oil bath for 16 h under N<sub>2</sub> atmosphere. After that, the reaction mixture was cooled down to room temperature, quenched with sat. aq. NaHCO<sub>3</sub> (10 mL), and then extracted with CH<sub>2</sub>Cl<sub>2</sub> (10 mL × 3). The combined organic layers were washed with sat.





The mixture was stirred at 120 °C in oil bath for 16 h under N<sub>2</sub> atmosphere. After that, the reaction mixture was cooled down to room temperature, quenched with sat. aq. NaHCO<sub>3</sub> (10 mL), and then extracted with CH<sub>2</sub>Cl<sub>2</sub> (10 mL × 3). The combined organic layers were washed with sat. NaCl, dried over Na<sub>2</sub>SO<sub>4</sub> and concentrated under vacuum. The resultant residue was purified by flash column chromatography (petroleum ether/ethyl acetate = 20:1 – 12:1) to give the product **3a** (with 0.34 equiv. Ph<sub>3</sub>B, **3a**: 19.0 mg, 30%; with 0.67 equiv. Ph<sub>3</sub>B, **3a**: 36.2 mg, 57%; with 1.2 equiv. NaBPh<sub>4</sub>, **3a**: 33.2 mg, 52%; with 1.2 equiv. Ph<sub>2</sub>BOH, **3a**: 4.5 mg, 7%; with 1.2 equiv. PhB(OH)<sub>2</sub>, **3a**: 0%).

*Note: Under the standard reaction conditions, both diphenylborinic acid and phenylboronic acid could be isolated by flash column chromatography (petroleum ether/ethyl acetate). <sup>1</sup>H NMR data and spectra of two compounds are provided below.*

Ph<sub>2</sub>BOH: <sup>1</sup>H NMR (400 MHz, DMSO-*d*<sub>6</sub>) δ 9.99 (brs, 1H), 7.70 (dd, *J* = 7.6, 1.5 Hz, 4H), 7.50 – 7.45 (m, 2H), 7.44 – 7.38 (m, 4H). The data of diphenylborinic acid is consistent with the literature report.<sup>5</sup>

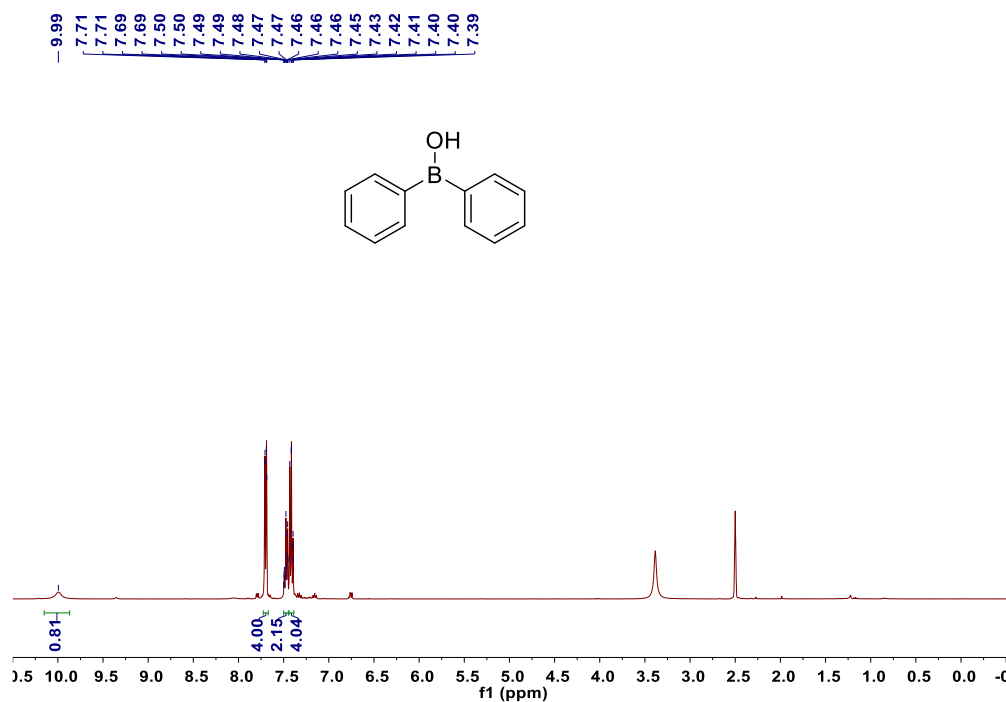

<sup>1</sup>H NMR spectrum for diphenylborinic acid (DMSO-*d*<sub>6</sub>)



PhB(OH)<sub>2</sub>: <sup>1</sup>H NMR (400 MHz, Chloroform-*d*) δ 8.33 – 8.19 (m, 2H), 7.65 – 7.57 (m, 1H), 7.55 – 7.49 (m, 2H). The data of phenylboronic acid is consistent with the literature report.<sup>6</sup>

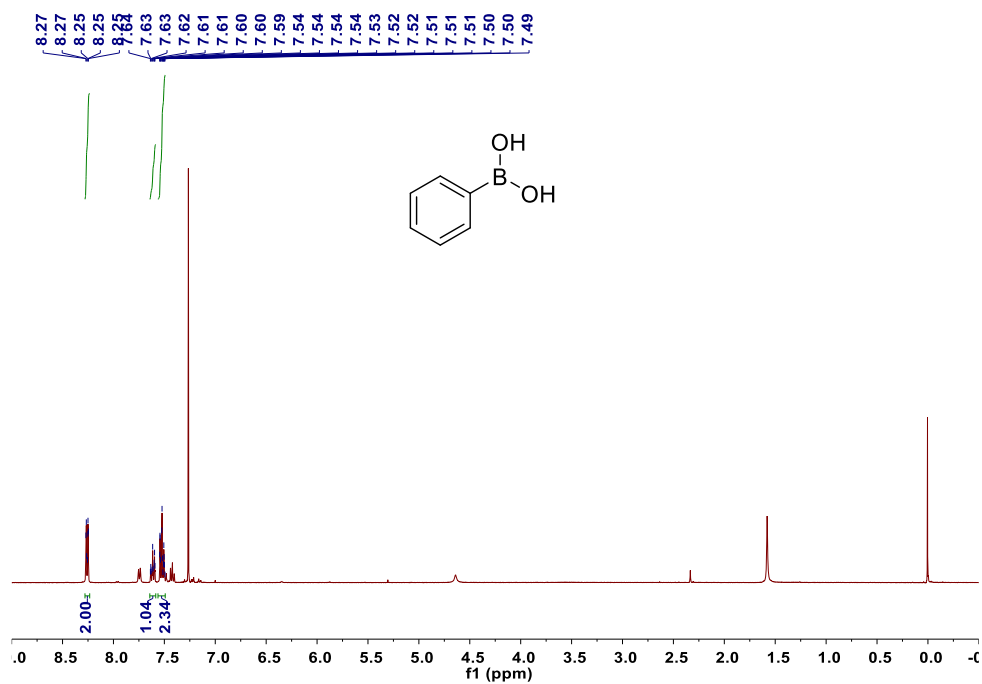

<sup>1</sup>H NMR spectrum for phenylboronic acid (CDCl<sub>3</sub>)

## 6. NMR data of the products

### *N*-(*p*-Tolyl)benzamide (3a)<sup>7</sup>

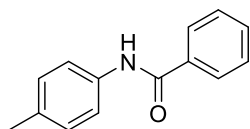

The title compound was prepared according to the general procedure and isolated as a white solid (52.7 mg, 0.249 mmol, 83%). M.p.: 155.8 – 157.4 °C. <sup>1</sup>H NMR (400 MHz, Chloroform-*d*)  $\delta$  8.01 (brs, 1H), 7.86 – 7.84 (m, 2H), 7.54 – 7.50 (m, 3H), 7.46 – 7.42 (m, 2H), 7.15 (d, *J* = 8.2 Hz, 2H), 2.34 (s, 3H). <sup>13</sup>C NMR (101 MHz, Chloroform-*d*)  $\delta$  165.9, 135.5, 135.1, 134.3, 131.8, 129.6  $\times$  2, 128.8  $\times$  2, 127.1  $\times$  2, 120.5  $\times$  2, 21.0. HRMS (ESI): *m/z* calculated for C<sub>14</sub>H<sub>14</sub>NO [M + H]<sup>+</sup>: 212.1070; Found: 212.1068.

### 4-Methyl-*N*-(*p*-tolyl)benzamide (3b)<sup>7</sup>

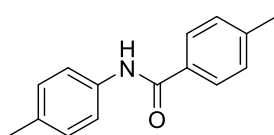

The title compound was prepared according to the general procedure and isolated as a white solid (41.9 mg, 0.186 mmol, 62%). M.p.: 165.4 – 166.6 °C. <sup>1</sup>H NMR (400 MHz, Chloroform-*d*)  $\delta$  8.14 (brs, 1H), 7.74 (d, *J* = 8.2 Hz, 2H), 7.53 (d, *J* = 8.5 Hz, 2H), 7.20 (d, *J* = 7.9 Hz, 2H), 7.13 (d, *J* = 8.3 Hz, 2H), 2.39 (s, 3H), 2.33 (s, 3H). <sup>13</sup>C NMR (101 MHz, Chloroform-*d*)  $\delta$  165.9, 142.1, 135.6, 134.0, 132.2, 129.5  $\times$  2, 129.3  $\times$  2, 127.2  $\times$  2, 120.6  $\times$  2, 21.5, 21.0. HRMS (ESI) *m/z* calculated for C<sub>15</sub>H<sub>16</sub>NO [M + H]<sup>+</sup>: 226.1226; Found: 226.1228.

### 2-Methyl-*N*-(*p*-tolyl)benzamide (3c)<sup>7</sup>

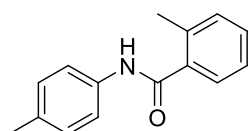

The title compound was prepared according to the general procedure and isolated as a white solid (45.2 mg, 0.201 mmol, 67%). M.p.: 145.4 – 146.6 °C. <sup>1</sup>H NMR (400 MHz, Chloroform-*d*)  $\delta$  7.54 (brs, 1H), 7.50 (d, *J* = 8.1 Hz, 2H), 7.45 (d, *J* = 7.6 Hz, 1H), 7.35 (t, *J* = 7.4 Hz, 1H), 7.25 – 7.21 (m, 2H), 7.17 (d, *J* = 8.0 Hz, 2H), 2.49 (s, 3H), 2.35 (s, 3H). <sup>13</sup>C NMR (101 MHz, Chloroform-*d*)  $\delta$  168.1, 136.7, 136.5, 135.6, 134.3, 131.3, 130.3, 129.7  $\times$  2, 126.7, 126.0  $\times$  2, 120.1, 21.0, 19.9. HRMS (ESI) *m/z* calculated for C<sub>15</sub>H<sub>16</sub>NO [M + H]<sup>+</sup>: 226.1226; Found: 226.1228.

### 4-Methoxy-*N*-(*p*-tolyl)benzamide (3d)<sup>7</sup>

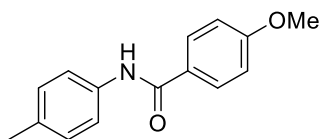

The title compound was prepared according to the general procedure and isolated as a yellow solid (56.3 mg, 0.233 mmol, 78%). M.p.: 147.0 – 147.8 °C. **<sup>1</sup>H NMR** (400 MHz, Chloroform-*d*)  $\delta$  8.03 (brs, 1H), 7.82 (d, *J* = 8.1 Hz, 2H), 7.51 (d, *J* = 8.4 Hz, 2H), 7.13 (d, *J* = 8.1 Hz, 2H), 6.90 (d, *J* = 8.8 Hz, 2H), 3.84 (s, 3H), 2.33 (s, 3H). **<sup>13</sup>C NMR** (101 MHz, Chloroform-*d*)  $\delta$  165.5, 162.4, 135.6, 134.0, 129.6  $\times$  2, 129.0  $\times$  2, 127.2, 120.5  $\times$  2, 113.9  $\times$  2, 55.5, 21.0. **HRMS** (ESI) *m/z* calculated for C<sub>15</sub>H<sub>16</sub>NO<sub>2</sub> [M + H]<sup>+</sup>: 242.1176; Found: 242.1178.

### 3-Methoxy-*N*-(*p*-tolyl)benzamide (3e)<sup>8</sup>

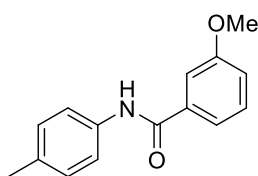

The title compound was prepared according to the general procedure and isolated as a brown solid (51.2 mg, 0.212 mmol, 71%). M.p.: 122.5 – 125.7 °C. **<sup>1</sup>H NMR** (400 MHz, Chloroform-*d*)  $\delta$  7.86 (brs, 1H), 7.52 (d, *J* = 8.2 Hz, 2H), 7.45 – 7.40 (m, 1H), 7.38 – 7.36 (m, 2H), 7.17 (d, *J* = 8.1 Hz, 2H), 7.08 – 7.05 (m, 1H), 3.85 (s, 3H), 2.34 (s, 3H). **<sup>13</sup>C NMR** (101 MHz, Chloroform-*d*)  $\delta$  165.7, 160.0, 136.7, 135.4, 134.4, 129.8  $\times$  2, 129.7  $\times$  2, 120.4, 118.8, 118.1, 112.5, 55.6, 21.0. **HRMS** (ESI) *m/z* calculated for C<sub>15</sub>H<sub>16</sub>NO<sub>2</sub> [M + H]<sup>+</sup>: 242.1176; Found: 242.1186.

### 4-(*tert*-Butyl)-*N*-(*p*-tolyl)benzamide (3f)<sup>8</sup>

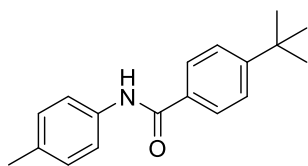

The title compound was prepared according to the general procedure and isolated as a white solid (51.3 mg, 0.192 mmol, 64%). M.p.: 125.6 – 127.9 °C. **<sup>1</sup>H NMR** (400 MHz, Chloroform-*d*)  $\delta$  7.83 – 7.79 (m, 3H), 7.52 (d, *J* = 8.4 Hz, 2H), 7.48 (d, *J* = 8.5 Hz, 2H), 7.16 (d, *J* = 8.2 Hz, 2H), 2.34 (s, 3H), 1.35 (s, 9H). **<sup>13</sup>C NMR** (101 MHz, Chloroform-*d*)  $\delta$  165.7, 155.4, 135.6, 134.2, 132.3, 129.7  $\times$  2, 127.0  $\times$  2, 125.8  $\times$  2, 120.3  $\times$  2, 35.1, 31.3  $\times$  3, 21.0. **HRMS** (ESI) *m/z* calculated for C<sub>18</sub>H<sub>22</sub>NO [M + H]<sup>+</sup>: 268.1696; Found: 268.1700.

### 4-Fluoro-*N*-(*p*-tolyl)benzamide (3g)<sup>8</sup>

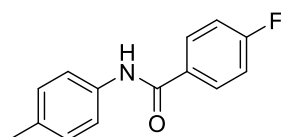

The title compound was prepared according to the general procedure and isolated as a white solid (39.9 mg, 0.174 mmol, 58%). M.p.: 174.0 – 174.6 °C. **<sup>1</sup>H NMR** (400 MHz, Chloroform-*d*)  $\delta$  7.88 – 7.85 (m, 3H),

7.49 (d,  $J = 8.4$  Hz, 2H), 7.17 – 7.11 (m, 4H), 2.34 (s, 3H).  **$^{19}\text{F}$  NMR** (377 MHz, Chloroform- $d$ )  $\delta$  -107.56.  **$^{13}\text{C}$  NMR** (101 MHz, Chloroform- $d$ )  $\delta$  165.0 (d,  $J = 253.1$  Hz), 164.8, 135.3, 134.5, 131.3 (d,  $J = 3.3$  Hz), 129.7  $\times 2$ , 129.6 (d,  $J = 9.0$  Hz)  $\times 2$ , 120.6  $\times 2$ , 115.9 (d,  $J = 21.9$  Hz)  $\times 2$ , 21.0. **HRMS** (ESI)  $m/z$  calculated for  $\text{C}_{14}\text{H}_{13}\text{FNO}$   $[\text{M} + \text{H}]^+$ : 230.0976; Found: 230.0983.

#### 3,5-Dimethyl-*N*-(*p*-tolyl)benzamide (3h)<sup>9</sup>

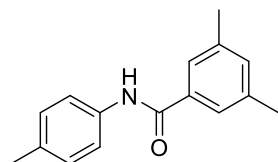

The title compound was prepared according to the general procedure and isolated as a yellow solid (44.5 mg, 0.186 mmol, 62%). M.p.: 123.9 – 125.6 °C.  **$^1\text{H}$  NMR** (400 MHz, Chloroform- $d$ )  $\delta$  7.77 (brs, 1H), 7.53 (d,  $J = 8.4$  Hz, 2H), 7.46 (d,  $J = 1.5$  Hz, 2H), 7.18 – 7.16 (m, 3H), 2.38 (s, 6H), 2.34 (s, 3H).  **$^{13}\text{C}$  NMR** (101 MHz, Chloroform- $d$ )  $\delta$  166.2, 138.6  $\times 2$ , 135.6, 135.2, 134.2, 133.4, 129.7  $\times 2$ , 124.9  $\times 2$ , 120.3  $\times 2$ , 21.4  $\times 2$ , 21.0. **HRMS** (ESI)  $m/z$  calculated for  $\text{C}_{16}\text{H}_{18}\text{NO}$   $[\text{M} + \text{H}]^+$ : 240.1383; Found: 240.1389.

#### 4-Methoxy-3-methyl-*N*-(*p*-tolyl)benzamide (3i)

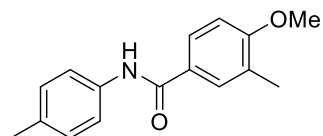

The title compound was prepared according to the general procedure and isolated as a yellow solid (51.8 mg, 0.203 mmol, 68%). M.p.: 124.5 – 125.2 °C.  **$^1\text{H}$  NMR** (400 MHz, Chloroform- $d$ )  $\delta$  7.83 – 7.63 (m, 3H), 7.57 – 7.48 (m, 2H), 7.23 – 7.12 (m, 2H), 6.87 (d,  $J = 8.5$  Hz, 1H), 3.89 (s, 3H), 2.34 (s, 3H), 2.27 (s, 3H).  **$^{13}\text{C}$  NMR** (101 MHz, Chloroform- $d$ )  $\delta$  165.5, 160.7, 135.7, 134.0, 129.7  $\times 2$ , 129.6, 127.1, 126.8, 126.5, 120.3  $\times 2$ , 109.6, 55.6, 21.0, 16.5. **IR** (KBr):  $\nu$  3282, 2972, 1646, 1592, 1568, 1519, 1393, 1047, 868, 508  $\text{cm}^{-1}$ . **HRMS** (ESI)  $m/z$  calculated for  $\text{C}_{16}\text{H}_{18}\text{NO}_2$   $[\text{M} + \text{H}]^+$ : 256.1332; Found: 256.1334.

#### 4-Methoxy-2-methyl-*N*-(*p*-tolyl)benzamide (3j)

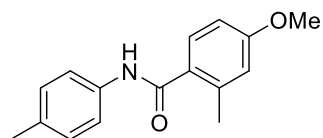

The title compound was prepared according to the general procedure and isolated as a white solid (49.1 mg, 0.192 mmol, 64%). M.p.: 161.4 – 163.5 °C.  **$^1\text{H}$  NMR** (400 MHz, Chloroform- $d$ )  $\delta$  7.49 – 7.45 (m, 3H), 7.39 (brs, 1H), 7.17 (d,  $J = 8.1$  Hz, 2H), 6.79 – 6.75 (m, 2H), 3.84 (s, 3H), 2.52 (s, 3H), 2.34 (s, 3H).  **$^{13}\text{C}$  NMR** (101 MHz, Chloroform- $d$ )  $\delta$  166.3, 159.9, 139.1, 136.3, 134.0, 129.6  $\times 2$ ,

129.0, 127.5, 120.8, 117.3, 111.8 × 2, 56.1, 21.0, 20.5. **IR** (KBr):  $\nu$  3279, 2972, 1732, 1644, 1607, 1520, 1398, 1263, 824, 506  $\text{cm}^{-1}$ . **HRMS** (ESI)  $m/z$  calculated for  $\text{C}_{16}\text{H}_{18}\text{NO}_2$   $[\text{M} + \text{H}]^+$ : 256.1332; Found: 256.1337.

#### *N*-(*p*-Tolyl)-1-naphthamide (**3k**)<sup>10</sup>

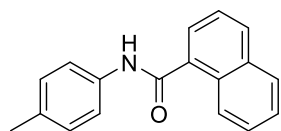

The title compound was prepared according to the general procedure and isolated as a yellow solid (47.9 mg, 0.183 mmol, 61%). M.p.: 192.8 – 194.2 °C. **<sup>1</sup>H NMR** (400 MHz, Chloroform-*d*)  $\delta$  8.36 – 8.34 (m, 1H), 7.94 (d,  $J$  = 8.2 Hz, 1H), 7.90 – 7.88 (m, 1H), 7.74 (brs, 1H), 7.70 (d,  $J$  = 7.0 Hz, 1H), 7.58 – 7.54 (m, 4H), 7.49 – 7.45 (m, 1H), 7.20 (d,  $J$  = 8.0 Hz, 2H), 2.37 (s, 3H). **<sup>13</sup>C NMR** (101 MHz, Chloroform-*d*)  $\delta$  167.6, 135.6, 134.7, 134.4, 133.8, 131.0, 130.2, 129.7 × 2, 128.5 × 2, 127.4, 126.7, 125.4, 125.2, 124.8, 120.2, 21.1. **HRMS** (ESI)  $m/z$  calculated for  $\text{C}_{18}\text{H}_{16}\text{NO}$   $[\text{M} + \text{H}]^+$ : 262.1226; Found: 262.1216.

#### *N*-(*p*-Tolyl)benzo[*d*][1,3]dioxole-5-carboxamide (**3l**)<sup>10</sup>

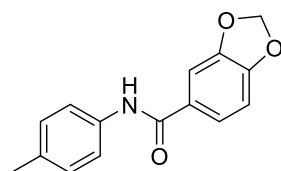

The title compound was prepared according to the general procedure and isolated as a yellow solid (61.4 mg, 0.241 mmol, 80%). M.p.: 137.2 – 139.2 °C. **<sup>1</sup>H NMR** (400 MHz, Chloroform-*d*)  $\delta$  7.71 (brs, 1H), 7.49 (d,  $J$  = 8.4 Hz, 2H), 7.43 – 7.34 (m, 1H), 7.20 – 7.13 (m, 2H), 6.86 (d,  $J$  = 8.1 Hz, 1H), 6.05 (s, 2H), 2.34 (s, 3H). **<sup>13</sup>C NMR** (101 MHz, Chloroform-*d*)  $\delta$  165.1, 150.7, 148.2, 135.4, 134.2, 129.7 × 2, 129.3, 121.8, 120.4 × 2, 108.2, 107.8, 101.9, 21.0. **HRMS** (ESI)  $m/z$  calculated for  $\text{C}_{15}\text{H}_{14}\text{NO}_3$   $[\text{M} + \text{H}]^+$ : 256.0968; Found: 256.0972.

#### *N*-(*p*-Tolyl)thiophene-2-carboxamide (**3m**)<sup>10</sup>

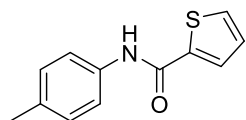

The title compound was prepared according to the general procedure and isolated as a yellow solid (53.4 mg, 0.246 mmol, 82%). M.p.: 203.8 – 205.3 °C. **<sup>1</sup>H NMR** (400 MHz, Chloroform-*d*)  $\delta$  7.70 (brs, 1H), 7.62 (dd,  $J$  = 3.7, 1.2 Hz, 1H), 7.53 (dd,  $J$  = 5.0, 1.2 Hz, 1H), 7.51 – 7.47 (m, 2H), 7.20 – 7.15 (m, 2H), 7.12 (dd,  $J$  = 5.0, 3.7 Hz, 1H), 2.34 (s, 3H). **<sup>13</sup>C NMR** (101 MHz, Chloroform-*d*)  $\delta$  160.2, 139.6, 135.1, 134.4,

130.7, 129.6 × 2, 128.5, 127.9, 120.6 × 2, 21.0. **HRMS** (ESI) *m/z* calculated for C<sub>12</sub>H<sub>12</sub>NOS [M + H]<sup>+</sup>: 218.0634; Found: 218.0641.

#### *N*-(4-(Trifluoromethyl)phenyl)benzamide (3n)<sup>7</sup>

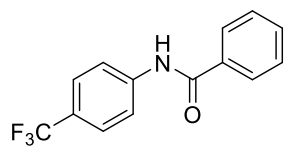

The title compound was prepared according to the general procedure and isolated as a white solid (59.2 mg, 0.223 mmol, 74%). M.p.: 206.6 – 208.2 °C. **<sup>1</sup>H NMR** (400 MHz, DMSO-*d*<sub>6</sub>) δ 10.59 (brs, 1H), 8.03 (d, *J* = 8.5 Hz, 2H), 7.98 (d, *J* = 7.1 Hz, 2H), 7.72 (d, *J* = 8.4 Hz, 2H), 7.64 – 7.60 (m, 1H), 7.57 – 7.53 (m, 2H). **<sup>19</sup>F NMR** (376 MHz, DMSO-*d*<sub>6</sub>) δ -60.24. **<sup>13</sup>C NMR** (101 MHz, DMSO-*d*<sub>6</sub>) δ 166.1, 142.9 (q, *J* = 1.5 Hz), 134.5, 132.0, 128.5 × 2, 127.8 × 2, 126.0 × 2 (q, *J* = 4.0 Hz), 124.4 (q, *J* = 271.3 Hz), 123.6 (q, *J* = 32.0 Hz), 120.1 × 2. **HRMS** (ESI) *m/z* calculated for C<sub>14</sub>H<sub>11</sub>F<sub>3</sub>NO [M + H]<sup>+</sup>: 266.0787; Found: 266.0788.

#### *N*-(4-Cyanophenyl)benzamide (3o)<sup>7</sup>

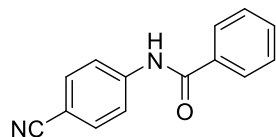

The title compound was prepared according to the general procedure and isolated as a white solid (42.1 mg, 0.189 mmol, 63%). M.p.: 171.8 – 173.4 °C. **<sup>1</sup>H NMR** (400 MHz, Chloroform-*d*) δ 8.23 (brs, 1H), 7.87 (d, *J* = 7.6 Hz, 2H), 7.81 (d, *J* = 8.8 Hz, 2H), 7.64 – 7.57 (m, 3H), 7.49 (t, *J* = 7.6 Hz, 2H). **<sup>13</sup>C NMR** (101 MHz, Chloroform-*d*) δ 166.1, 142.2, 134.2, 133.4 × 2, 132.6, 129.1 × 2, 127.3 × 2, 120.1 × 2, 119.0, 107.4. **HRMS** (ESI) *m/z* calculated for C<sub>14</sub>H<sub>11</sub>N<sub>2</sub>O [M + H]<sup>+</sup>: 223.0866; Found: 223.0869.

#### *N*-(4-Nitrophenyl)benzamide (3p)<sup>11</sup>

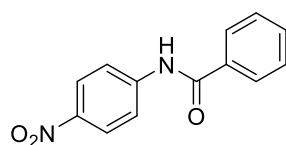

The title compound was prepared according to the general procedure and isolated as a yellow solid (54.8 mg, 0.226 mmol, 75%). M.p.: 199.8 – 200.9 °C. **<sup>1</sup>H NMR** (400 MHz, Methanol-*d*<sub>4</sub>) δ 8.28 (d, *J* = 9.1 Hz, 2H), 8.08 (brs, 1H), 7.91 – 7.89 (m, 2H), 7.86 (d, *J* = 9.2 Hz, 2H), 7.64 – 7.60 (m, 1H), 7.56 – 7.52 (m, 2H). **<sup>13</sup>C NMR** (101 MHz, Methanol-*d*<sub>4</sub>) δ 169.0, 146.4, 144.8, 135.8, 133.4, 129.7 × 2, 128.8 × 2, 125.7 × 2, 121.3 × 2. **HRMS** (ESI) *m/z* calculated for C<sub>13</sub>H<sub>11</sub>N<sub>2</sub>O<sub>3</sub> [M + H]<sup>+</sup>: 243.0764; Found: 243.0762.

### ***N*-(4-Fluorophenyl)benzamide (3q)<sup>11</sup>**

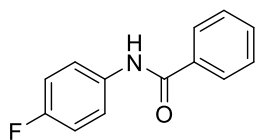

The title compound was prepared according to the general procedure and isolated as a white solid (40.7 mg, 0.189 mmol, 63%). M.p.: 184.5 – 187.3

°C. <sup>1</sup>H NMR (400 MHz, Chloroform-*d*) δ 7.87 (d, *J* = 7.2 Hz, 2H), 7.82 (brs, 1H), 7.62 – 7.55 (m, 3H), 7.52 – 7.48 (m, 2H), 7.07 (t, *J* = 8.6 Hz, 2H). <sup>19</sup>F NMR (377 MHz, Chloroform-*d*) δ -117.48. <sup>13</sup>C NMR (101 MHz, Chloroform-*d*) δ 165.9, 159.7 (d, *J* = 243.9 Hz), 134.9, 134.0 (d, *J* = 3.1 Hz), 132.1, 129.0 × 2, 127.1 × 2, 122.3 × 2 (d, *J* = 8.2 Hz), 115.9 × 2 (d, *J* = 22.6 Hz). HRMS (ESI) *m/z* calculated for C<sub>13</sub>H<sub>11</sub>FNO [M + H]<sup>+</sup>: 216.0819; Found: 216.0828.

### ***N*-(4-Chlorophenyl)benzamide (3r)<sup>7</sup>**

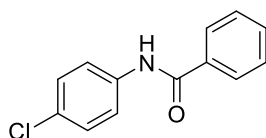

The title compound was prepared according to the general procedure and isolated as a white solid (50.3 mg, 0.217 mmol, 72%). M.p.: 188.2 – 190.7

°C. <sup>1</sup>H NMR (400 MHz, DMSO-*d*<sub>6</sub>) δ 10.38 (brs, 1H), 7.96 – 7.93 (m, 2H), 7.82 (d, *J* = 8.9 Hz, 2H), 7.62 – 7.58 (m, 1H), 7.56 – 7.51 (m, 2H), 7.41 (d, *J* = 8.9 Hz, 2H). <sup>13</sup>C NMR (101 MHz, DMSO-*d*<sub>6</sub>) δ 165.7, 138.2, 134.7, 131.7, 128.5 × 2, 128.4 × 2, 127.7 × 2, 127.3, 121.8 × 2. HRMS (ESI) *m/z* calculated for C<sub>13</sub>H<sub>11</sub><sup>35</sup>ClNO [M + H]<sup>+</sup>: 232.0524; Found: 232.0531; C<sub>13</sub>H<sub>11</sub><sup>37</sup>ClNO [M + H]<sup>+</sup>: 234.0494; Found: 234.0502.

### ***N*-(2-Chlorophenyl)benzamide (3s)<sup>11</sup>**

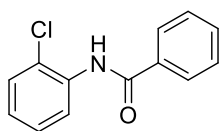

The title compound was prepared according to the general procedure and isolated as a white solid (62.6 mg, 0.270 mmol, 90%). M.p.: 120.2 – 122.8 °C.

<sup>1</sup>H NMR (400 MHz, Chloroform-*d*) δ 8.58 (dd, *J* = 8.3, 1.5 Hz, 1H), 8.46 (brs, 1H), 7.94 – 7.92 (m, 2H), 7.61 – 7.57 (m, 1H), 7.55 – 7.51 (m, 2H), 7.44 – 7.41 (m, 1H), 7.37 – 7.32 (m, 1H), 7.11 – 7.07 (m, 1H). <sup>13</sup>C NMR (101 MHz, Chloroform-*d*) δ 165.4, 134.9, 134.8, 132.3, 129.2, 129.1 × 2, 128.0, 127.2 × 2, 124.9, 123.2, 121.6. HRMS (ESI) *m/z* calculated for C<sub>13</sub>H<sub>11</sub><sup>35</sup>ClNO [M + H]<sup>+</sup>: 232.0524; Found: 232.0529; C<sub>13</sub>H<sub>11</sub><sup>37</sup>ClNO [M + H]<sup>+</sup>: 234.0494; Found: 234.0495.

### ***N*-(3,4-Dichlorophenyl)benzamide (3t)<sup>12</sup>**

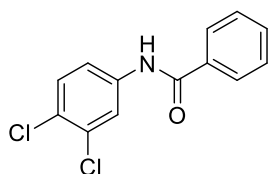

The title compound was prepared according to the general procedure and isolated as a white solid (53.1 mg, 0.200 mmol, 67%). M.p.: 148.6 – 149.3 °C. **<sup>1</sup>H NMR** (400 MHz, Chloroform-*d*)  $\delta$  8.03 (s, 1H), 7.88 – 7.87 (m, 1H), 7.84 – 7.82 (m, 2H), 7.58 – 7.55 (m, 1H), 7.48 – 7.44 (m, 3H), 7.38 (d, *J* = 8.7 Hz, 1H). **<sup>13</sup>C NMR** (101 MHz, Chloroform-*d*)  $\delta$  166.0, 137.5, 134.3, 133.0, 132.4, 130.7, 129.0  $\times$  2, 127.9, 127.2  $\times$  2, 122.1, 119.6. **HRMS** (ESI) *m/z* calculated for C<sub>13</sub>H<sub>10</sub><sup>35</sup>Cl<sub>2</sub>NO [M + H]<sup>+</sup>: 266.0134; Found: 266.0138; C<sub>13</sub>H<sub>10</sub><sup>37</sup>Cl<sub>2</sub>NO [M + H]<sup>+</sup>: 268.0104; Found: 268.0105.

### ***N*-(3-Bromophenyl)benzamide (3u)<sup>13</sup>**

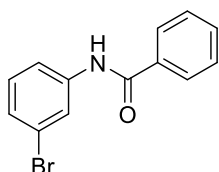

The title compound was prepared according to the general procedure and isolated as a white solid (57.3 mg, 0.208 mmol, 69%). M.p.: 138.7 – 140.1 °C. **<sup>1</sup>H NMR** (400 MHz, Chloroform-*d*)  $\delta$  8.15 (brs, 1H), 7.88 (t, *J* = 2.0 Hz, 1H), 7.83 – 7.80 (m, 2H), 7.55 – 7.50 (m, 2H), 7.44 – 7.40 (m, 2H), 7.26 – 7.24 (m, 1H), 7.17 (t, *J* = 8.0 Hz, 1H). **<sup>13</sup>C NMR** (101 MHz, Chloroform-*d*)  $\delta$  166.1, 139.3, 134.5, 132.2, 130.4, 128.9  $\times$  2, 127.6, 127.2  $\times$  2, 123.4, 122.7, 119.0. **HRMS** (ESI) *m/z* calculated for C<sub>13</sub>H<sub>11</sub><sup>79</sup>BrNO [M + H]<sup>+</sup>: 276.0019; Found: 276.0018; C<sub>13</sub>H<sub>11</sub><sup>81</sup>BrNO [M + H]<sup>+</sup>: 277.9998; Found: 277.9994.

### ***N*-(4-(Trifluoromethoxy)phenyl)benzamide (3v)<sup>14</sup>**

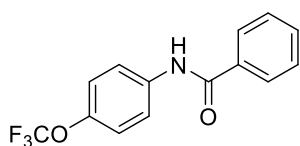

The title compound was prepared according to the general procedure and isolated as a white solid (64.8 mg, 0.230 mmol, 77%). M.p.: 187.2 – 190.0 °C. **<sup>1</sup>H NMR** (400 MHz, Methanol-*d*<sub>4</sub>)  $\delta$  7.94 – 7.92 (m, 2H), 7.81 (d, *J* = 9.1 Hz, 2H), 7.61 – 7.56 (m, 1H), 7.53 – 7.49 (m, 2H), 7.27 (d, *J* = 8.6 Hz, 2H). **<sup>19</sup>F NMR** (376 MHz, Methanol-*d*<sub>4</sub>)  $\delta$  -59.62. **<sup>13</sup>C NMR** (101 MHz, Methanol-*d*<sub>4</sub>)  $\delta$  168.9, 146.7 (q, *J* = 2.1 Hz), 139.1, 136.0, 133.0, 129.7  $\times$  2, 128.7  $\times$  2, 123.4  $\times$  2, 122.6  $\times$  2, 122.0 (q, *J* = 254.7 Hz). **HRMS** (ESI) *m/z* calculated for C<sub>14</sub>H<sub>11</sub>F<sub>3</sub>NO<sub>2</sub> [M + H]<sup>+</sup>: 282.0736; Found: 282.0740.

### ***N*-Phenylbenzamide (3w)<sup>7</sup>**

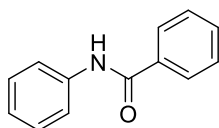

The title compound was prepared according to the general procedure and isolated as a white solid (42.0 mg, 0.213 mmol, 71%). M.p.: 161.6 – 162.4 °C. **<sup>1</sup>H NMR** (400 MHz, Chloroform-*d*)  $\delta$  7.97 – 7.83 (m, 3H), 7.70 – 7.61 (m,



2H), 7.58 – 7.53 (m, 1H), 7.50 – 7.46 (m, 2H), 7.40 – 7.36 (m, 2H), 7.16 (td,  $J = 7.5, 1.1$  Hz, 1H).  $^{13}\text{C NMR}$  (101 MHz, Chloroform- $d$ )  $\delta$  165.9, 138.0, 135.1, 132.0, 129.2  $\times$  2, 128.9  $\times$  2, 127.2  $\times$  2, 124.7, 120.3  $\times$  2. **HRMS** (ESI)  $m/z$  calculated for  $\text{C}_{13}\text{H}_{12}\text{NO}$   $[\text{M} + \text{H}]^+$ : 198.0913; Found: 198.0914.

#### ***N*-(*o*-Tolyl)benzamide (3x)<sup>7</sup>**

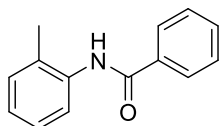

The title compound was prepared according to the general procedure and isolated as a white solid (37.6 mg, 0.178 mmol, 59%). M.p.: 145.2 – 146.5 °C.

$^1\text{H NMR}$  (400 MHz, DMSO- $d_6$ )  $\delta$  9.89 (brs, 1H), 8.00 – 7.98 (m, 2H), 7.61 – 7.51 (m, 3H), 7.36 – 7.34 (m, 1H), 7.29 – 7.27 (m, 1H), 7.24 – 7.15 (m, 2H), 2.24 (s, 3H).  $^{13}\text{C NMR}$  (101 MHz, DMSO- $d_6$ )  $\delta$  165.3, 136.4, 134.5, 133.7, 131.5, 130.3, 128.4  $\times$  2, 127.6  $\times$  2, 126.6, 126.0  $\times$  2, 17.9. **HRMS** (ESI)  $m/z$  calculated for  $\text{C}_{14}\text{H}_{14}\text{NO}$   $[\text{M} + \text{H}]^+$ : 212.1070; Found: 212.1069.

#### ***N*-(*m*-Tolyl)benzamide (3y)<sup>7</sup>**

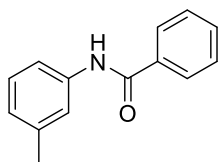

The title compound was prepared according to the general procedure and isolated as a yellow solid (44.3 mg, 0.210 mmol, 70%). M.p.: 124.9 – 125.6

°C.  $^1\text{H NMR}$  (400 MHz, Chloroform- $d$ )  $\delta$  7.91 (brs, 1H), 7.86 – 7.83 (m, 2H), 7.54 – 7.50 (m, 2H), 7.47 – 7.40 (m, 3H), 7.25 – 7.21 (m, 1H), 6.95 (dd,  $J = 7.6, 1.4$  Hz, 1H), 2.34 (s, 3H).  $^{13}\text{C NMR}$  (101 MHz, Chloroform- $d$ )  $\delta$  165.9, 139.1, 138.0, 135.2, 131.9, 129.0, 128.9  $\times$  2, 127.1  $\times$  2, 125.5, 121.0, 117.4, 21.6. **HRMS** (ESI)  $m/z$  calculated for  $\text{C}_{14}\text{H}_{14}\text{NO}$   $[\text{M} + \text{H}]^+$ : 212.1070; Found: 212.1068.

#### ***N*-(3,5-Dimethylphenyl)benzamide (3z)<sup>15</sup>**

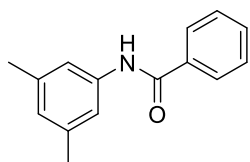

The title compound was prepared according to the general procedure and isolated as a yellow solid (50.9 mg, 0.226 mmol, 75%). M.p.: 141.3 – 143.0

°C.  $^1\text{H NMR}$  (400 MHz, Chloroform- $d$ )  $\delta$  8.03 (d,  $J = 11.1$  Hz, 1H), 7.87 – 7.84 (m, 2H), 7.53 – 7.49 (m, 1H), 7.46 – 7.41 (m, 2H), 7.29 (s, 2H), 6.79 (brs, 1H), 2.30 (s, 6H).  $^{13}\text{C NMR}$  (101 MHz, Chloroform- $d$ )  $\delta$  165.9, 138.8, 137.9, 135.1, 131.8  $\times$  2, 128.8  $\times$  2, 127.1  $\times$  2, 126.4, 118.2  $\times$  2, 21.4  $\times$  2. **HRMS** (ESI)  $m/z$  calculated for  $\text{C}_{15}\text{H}_{16}\text{NO}$   $[\text{M} + \text{H}]^+$ : 226.1226; Found: 226.1231.

### ***N*-(3-Chloro-4-methylphenyl)benzamide (3aa)<sup>16</sup>**

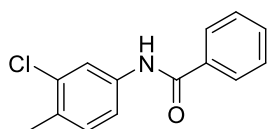

The title compound was prepared according to the general procedure and isolated as a yellow solid (53.4 mg, 0.217 mmol, 72%). M.p.: 124.4 – 125.9 °C. <sup>1</sup>H NMR (400 MHz, Chloroform-*d*)  $\delta$  7.99 (brs, 1H), 7.85 – 7.82 (m, 2H), 7.72 (d, *J* = 2.3 Hz, 1H), 7.55 – 7.51 (m, 1H), 7.47 – 7.39 (m, 3H), 7.17 (d, *J* = 8.2 Hz, 1H), 2.34 (s, 3H). <sup>13</sup>C NMR (101 MHz, Chloroform-*d*)  $\delta$  165.9, 136.8, 134.7, 134.6, 132.3, 132.1, 131.1, 128.9  $\times$  2, 127.2  $\times$  2, 121.1, 118.8, 19.6. HRMS (ESI) *m/z* calculated for C<sub>14</sub>H<sub>13</sub><sup>35</sup>ClNO [M + H]<sup>+</sup>: 246.0680; Found: 246.0686; C<sub>14</sub>H<sub>13</sub><sup>37</sup>ClNO [M + H]<sup>+</sup>: 248.0651; Found: 248.0658.

### ***N*-(4-Methoxyphenyl)benzamide (3ab)<sup>7</sup>**

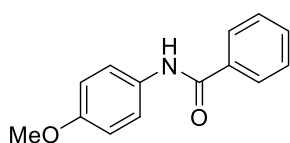

The title compound was prepared according to the general procedure and isolated as a yellow solid (41.5 mg, 0.183 mmol, 61%). M.p.: 149.0 – 151.1 °C. <sup>1</sup>H NMR (400 MHz, Chloroform-*d*)  $\delta$  7.86 (d, *J* = 7.6 Hz, 2H), 7.81 (brs, 1H), 7.55 – 7.52 (m, 3H), 7.49 – 7.45 (m, 2H), 6.92 – 6.89 (m, 2H), 3.82 (s, 3H). <sup>13</sup>C NMR (101 MHz, Chloroform-*d*)  $\delta$  156.7, 135.1, 131.8, 131.1, 128.8  $\times$  2, 127.1  $\times$  2, 122.3, 114.3  $\times$  4, 55.6. HRMS (ESI) *m/z* calculated for C<sub>14</sub>H<sub>14</sub>NO<sub>2</sub> [M + H]<sup>+</sup>: 228.1019; Found: 228.1027.

### ***N*-(Naphthalen-1-yl)benzamide (3ac)<sup>7</sup>**

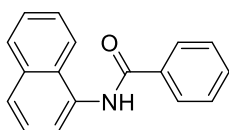

The title compound was prepared according to the general procedure and isolated as a yellow solid (39.9 mg, 0.161 mmol, 54%). M.p.: 160.0 – 161.5 °C. <sup>1</sup>H NMR (400 MHz, Chloroform-*d*)  $\delta$  8.21 (brs, 1H), 8.07 (d, *J* = 7.4 Hz, 1H), 8.01 (d, *J* = 7.5 Hz, 2H), 7.92 (t, *J* = 5.7 Hz, 2H), 7.76 (d, *J* = 8.3 Hz, 1H), 7.61 – 7.52 (m, 6H). <sup>13</sup>C NMR (101 MHz, Chloroform-*d*)  $\delta$  166.4, 135.0, 134.3, 132.5, 132.1, 129.0  $\times$  2, 129.0, 127.6, 127.3  $\times$  2, 126.6, 126.3, 126.2, 125.9, 121.4, 120.8. HRMS (ESI) *m/z* calculated for C<sub>17</sub>H<sub>14</sub>NO [M + H]<sup>+</sup>: 248.1070; Found: 248.1078.

### ***N*-Benzylbenzamide (3ad)<sup>11</sup>**

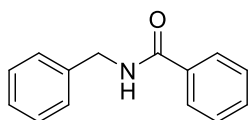

The title compound was prepared according to the general procedure and isolated as a white solid (38.6 mg, 0.183 mmol, 61%). M.p.: 120.2 – 121.2 °C. <sup>1</sup>H NMR (400 MHz, Chloroform-*d*)  $\delta$  7.72 (dd, *J* = 8.4, 1.4 Hz, 2H),

7.42 – 7.40 (m, 1H), 7.33 (td,  $J = 7.4, 1.4$  Hz, 2H), 7.27 – 7.25 (m, 4H), 7.23 – 7.19 (m, 1H), 6.60 (brs, 1H), 4.55 (dd,  $J = 5.7, 1.8$  Hz, 2H).  $^{13}\text{C NMR}$  (101 MHz, Chloroform-*d*)  $\delta$  167.5, 138.3, 134.4, 131.6, 128.8  $\times$  2, 128.6  $\times$  2, 127.9  $\times$  2, 127.6, 127.1  $\times$  2, 44.1. **HRMS** (ESI)  $m/z$  calculated for  $\text{C}_{14}\text{H}_{14}\text{NO}$   $[\text{M} + \text{H}]^+$ : 212.1070; Found: 212.1073.

### ***N*-Ethylbenzamide (3ae)<sup>11</sup>**

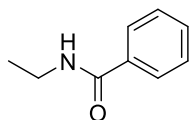

The title compound was prepared according to the general procedure and isolated as a white solid (24.5 mg, 0.164 mmol, 55%). M.p.: 119.9 – 120.2 °C.  $^1\text{H NMR}$  (400 MHz, Chloroform-*d*)  $\delta$  7.78 – 7.75 (m, 2H), 7.51 – 7.47 (m, 1H), 7.44 – 7.38 (m, 2H), 6.22 (brs, 1H), 3.50 (qd,  $J = 7.3, 5.6$  Hz, 2H), 1.25 (t,  $J = 7.3$  Hz, 3H).  $^{13}\text{C NMR}$  (101 MHz, Chloroform-*d*)  $\delta$  167.7, 134.9, 131.5, 128.7  $\times$  2, 126.9  $\times$  2, 35.1, 15.0. **HRMS** (ESI)  $m/z$  calculated for  $\text{C}_9\text{H}_{12}\text{NO}$   $[\text{M} + \text{H}]^+$ : 150.0913; Found: 150.0913.

### ***N*-Butylbenzamide (3af)<sup>17</sup>**

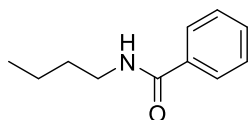

The title compound was prepared according to the general procedure and isolated as a yellow oil (28.2 mg, 0.159 mmol, 53%).  $^1\text{H NMR}$  (400 MHz, Chloroform-*d*)  $\delta$  7.76 (d,  $J = 7.4$  Hz, 2H), 7.49 – 7.40 (m, 3H), 6.20 (brs, 1H), 3.46 (q,  $J = 6.8$  Hz, 2H), 1.62 – 1.58 (m, 2H), 1.44 – 1.41 (m, 2H), 0.96 (t,  $J = 7.3$  Hz, 3H).  $^{13}\text{C NMR}$  (101 MHz, Chloroform-*d*)  $\delta$  167.7, 135.0, 131.4, 128.7  $\times$  2, 126.9  $\times$  2, 39.9, 31.9, 20.3, 13.9. **HRMS** (ESI)  $m/z$ : calculated for  $\text{C}_{11}\text{H}_{16}\text{NO}$   $[\text{M} + \text{H}]^+$ : 178.1226; Found: 178.1229.

### ***N*-Octylbenzamide (3ag)<sup>17</sup>**

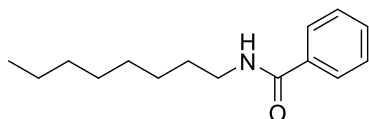

The title compound was prepared according to the general procedure and isolated as a white solid (41.2 mg, 0.177 mmol, 59%). M.p.: 119.8 – 119.9 °C.  $^1\text{H NMR}$  (400 MHz, Chloroform-*d*)  $\delta$  7.78 – 7.75 (m, 2H), 7.51 – 7.46 (m, 1H), 7.44 – 7.39 (m, 2H), 6.23 (brs, 1H), 3.44 (td,  $J = 7.3, 5.7$  Hz, 2H), 1.64 – 1.59 (m, 2H), 1.33 – 1.26 (m, 10H), 0.90 – 0.86 (m, 3H).  $^{13}\text{C NMR}$  (101 MHz, Chloroform-*d*)  $\delta$  167.7, 134.9, 131.4, 128.6  $\times$  2, 127.0  $\times$  2, 40.2, 31.9, 29.8, 29.4, 29.3, 27.1, 22.7, 14.2. **HRMS** (ESI)  $m/z$  calculated for  $\text{C}_{15}\text{H}_{24}\text{NO}$   $[\text{M} + \text{H}]^+$ : 234.1852; Found: 234.1854.

### *N*-Cyclohexylbenzamide (3ah)<sup>18</sup>

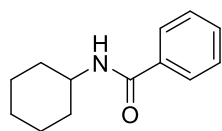

The title compound was prepared according to the general procedure and isolated as a white solid (32.3 mg, 0.159 mmol, 53%). M.p.: 137.8 – 139.6 °C.

<sup>1</sup>H NMR (400 MHz, Chloroform-*d*)  $\delta$  7.76 – 7.74 (m, 2H), 7.51 – 7.47 (m, 1H), 7.45 – 7.40 (m, 2H), 5.96 (brs, 1H), 4.03 – 3.94 (m, 1H), 2.06 – 2.02 (m, 2H), 1.79 – 1.72 (m, 2H), 1.69 – 1.64 (m, 1H), 1.49 – 1.38 (m, 2H), 1.29 – 1.19 (m, 3H). <sup>13</sup>C NMR (101 MHz, Chloroform-*d*)  $\delta$  166.8, 135.3, 131.4, 128.7  $\times$  2, 126.9  $\times$  2, 48.8, 33.4  $\times$  2, 25.7  $\times$  2, 25.1. HRMS (ESI) *m/z* calculated for C<sub>13</sub>H<sub>18</sub>NO [M + H]<sup>+</sup>: 204.1383; Found: 204.1382.

### *N*-(9-Ethyl-9H-carbazol-3-yl)benzamide (3ai)<sup>19</sup>

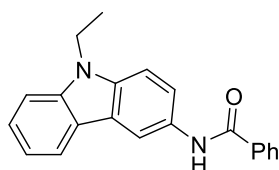

The title compound was prepared according to the typical procedure and isolated as a yellow oil (73.2 mg, 0.233 mmol, 78%). M.p.: 184.8 –

185.8 °C. <sup>1</sup>H NMR (400 MHz, Chloroform-*d*)  $\delta$  8.44 (brs, 1H), 8.12 (s, 1H), 8.06 (d, *J* = 7.8 Hz, 1H), 7.94 (d, *J* = 7.3 Hz, 2H), 7.63 (d, *J* = 8.4 Hz, 1H), 7.55 (t, *J* = 7.4 Hz, 1H), 7.50 – 7.46 (m, 3H), 7.40 (d, *J* = 8.1 Hz, 1H), 7.34 (d, *J* = 8.9 Hz, 1H), 7.21 (t, *J* = 7.4 Hz, 1H), 4.33 (q, *J* = 7.3 Hz, 2H), 1.41 (t, *J* = 7.2 Hz, 3H). <sup>13</sup>C NMR (101 MHz, Chloroform-*d*)  $\delta$  166.0, 140.5, 137.5, 135.3, 131.7, 129.8, 128.8  $\times$  2, 127.2  $\times$  2, 126.0, 123.1, 122.9, 120.8, 119.9, 118.9, 113.3, 108.7  $\times$  2, 37.7, 13.9. HRMS (ESI) *m/z* calculated for C<sub>21</sub>H<sub>19</sub>N<sub>2</sub>O [M + H]<sup>+</sup>: 315.1492; Found: 315.1498.

### Methyl benzoyl-*L*-leucinate (3aj)<sup>20</sup>

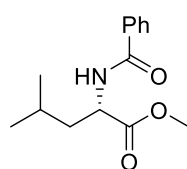

The title compound was prepared according to the typical procedure and isolated as a yellow oil (33.1 mg, 0.133 mmol, 44%). <sup>1</sup>H NMR (400 MHz,

Chloroform-*d*)  $\delta$  7.83 – 7.79 (m, 2H), 7.54 – 7.50 (m, 1H), 7.47 – 7.43 (m, 1H), 6.54 (d, *J* = 8.3 Hz, 1H), 4.90 – 4.84 (m, 1H), 3.77 (s, 3H), 1.79 – 1.67 (m, 3H), 1.01 – 0.97 (m, 6H). <sup>13</sup>C NMR (101 MHz, Chloroform-*d*)  $\delta$  173.9, 167.2, 134.0, 131.9, 128.8  $\times$  2, 127.2  $\times$  2, 52.6, 51.2, 42.0, 25.1, 23.0, 22.2. HRMS (ESI) *m/z* calculated for C<sub>14</sub>H<sub>20</sub>NO<sub>3</sub> [M + H]<sup>+</sup>: 250.1438; Found: 250.1437.

### Ethyl benzoyl-*L*-phenylalaninate (3ak)<sup>21</sup>

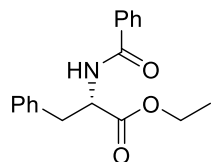

The title compound was prepared according to the typical procedure and isolated as a yellow oil (35.4 mg, 0.119 mmol, 40%).  $^1\text{H NMR}$  (400 MHz, Chloroform-*d*)  $\delta$  7.75 – 7.72 (m, 2H), 7.53 – 7.49 (m, 1H), 7.45 – 7.41 (m, 2H), 7.32 – 7.25 (m, 2H), 7.16 – 7.14 (m, 2H), 6.64 (d,  $J = 7.6$  Hz, 1H), 5.10 – 5.05 (m, 1H), 4.22 (q,  $J = 7.1$  Hz, 2H), 3.32 – 3.22 (m, 2H), 1.28 (t,  $J = 7.2$  Hz, 3H).  $^{13}\text{C NMR}$  (101 MHz, Chloroform-*d*)  $\delta$  171.7, 166.9, 136.0, 134.0, 131.9, 129.5  $\times$  2, 128.7  $\times$  4, 127.3, 127.1  $\times$  2, 61.8, 53.6, 38.0, 14.3. **HRMS** (ESI)  $m/z$  calculated for  $\text{C}_{18}\text{H}_{20}\text{NO}_3$   $[\text{M} + \text{H}]^+$ : 298.1438; Found: 298.1440.

## 7. DFT calculations for the reaction mechanism

DFT calculations were performed to gain insight into the mechanisms of the catalyst-free cross-coupling of isocyanates and triarylboranes.

### Computational details

All theoretical calculations were carried out using density functional theory with the Gaussian 16 program package,<sup>22</sup> and the structures were illustrated by CYLview (**Figure S1**).<sup>23</sup> The calculations were carried out for all molecules using the B3LYP functional<sup>24-26</sup> and 6-31G\*\*<sup>27</sup> basis set with Grimme's D3 dispersion corrections and Becke-Johnson damping.<sup>28</sup> The effect of solvation in 1,1,2-trichloroethane were accounted for implicitly using the SMD polarizable continuum model.<sup>29</sup> Intrinsic reaction coordinate (IRC)<sup>30</sup> calculations were conducted to verify the critical reaction steps. The energetic results were then improved by the single-point calculations at the B3LYP+D3BJ/6-311++G\*\*<sup>31,32</sup>/SMD. For comparison, the performances of several popular DFT functionals (e.g., B3LYP, BP86,<sup>33,34</sup> M06-2X<sup>35</sup>), and basis sets (6-31G\*\*, 6-311++G\*\*, def2-SVP,<sup>36</sup> def2-TZVPP<sup>37</sup>) were studied (see Table S2), implying that our method used in this study is reliable.

**Table S2.** Computed free energy barriers of transition states (in kcal/mol) using different levels of theories.

| Method                                             | $\Delta\Delta^\ddagger\text{G}(\text{TS1})$ |
|----------------------------------------------------|---------------------------------------------|
| B3LYP+D3BJ/6-311++G**/SMD//B3LYP+D3BJ/6-31G**/SMD  | 23.1                                        |
| B3LYP+D3BJ/def2-TZVPP/SMD//B3LYP+D3BJ/def2-SVP/SMD | 25.8                                        |
| M06-2X+D3/6-311++G**/SMD// M06-2X+D3/6-31G**/SMD   | 21.5                                        |
| M06-2X+D3/def2-TZVPP/SMD// M06-2X+D3/def2-SVP/SMD  | 23.8                                        |
| BP86+D3BJ/def2-TZVPP/SMD//BP86+D3BJ/def2-SVP/SMD   | 16.2                                        |

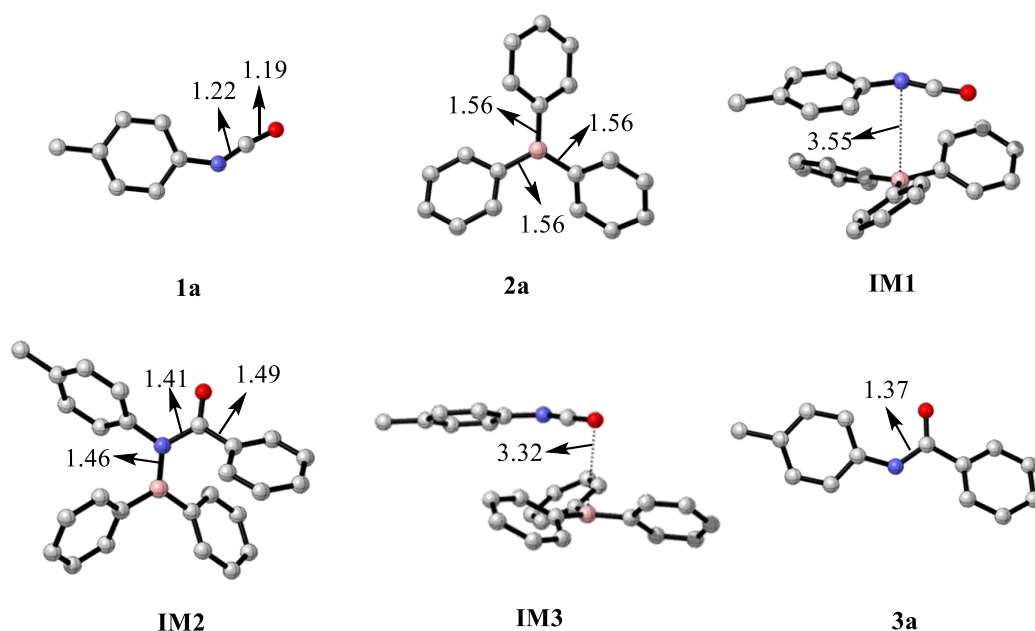

**Figure S1.** Computed structures of **1a**, **2a**, **IM1**, **IM2**, **IM3**, **3a**. Part of the hydrogen atoms are omitted for clarity, selected bond distance is given in Å (color code, C: grey, N: blue, O: red, H: white, B: pink).

| <b>1a</b>                        |          |          |          | <b>2a</b>                      |          |          |          |
|----------------------------------|----------|----------|----------|--------------------------------|----------|----------|----------|
| Gibbs Free Energy = -439.1123207 |          |          |          | Gibbs Free Energy = -719.86755 |          |          |          |
| N                                | 0.2092   | -2.63978 | -0.34139 | B                              | -0.52682 | -2.674   | 0.000023 |
| C                                | 1.002466 | -3.52237 | -0.62533 | C                              | 1.036393 | -2.6709  | -0.0016  |
| O                                | 1.897827 | -4.26698 | -0.87872 | C                              | 1.772825 | -3.67728 | -0.6616  |
| C                                | -1.17831 | -2.47521 | -0.21291 | C                              | 1.770181 | -1.66155 | 0.656814 |
| C                                | -1.66898 | -1.20895 | 0.153035 | C                              | 3.1666   | -3.67041 | -0.67714 |
| C                                | -2.07806 | -3.53923 | -0.4366  | H                              | 1.240632 | -4.46841 | -1.1809  |
| C                                | -3.04962 | -1.01292 | 0.291306 | C                              | 3.164004 | -1.66275 | 0.669267 |
| H                                | -0.96389 | -0.3914  | 0.328009 | H                              | 1.235931 | -0.87257 | 1.177258 |
| C                                | -3.45195 | -3.32346 | -0.29351 | C                              | 3.865591 | -2.66515 | -0.00471 |
| H                                | -1.69153 | -4.52397 | -0.71799 | H                              | 3.708465 | -4.44891 | -1.20646 |
| C                                | -3.96629 | -2.05961 | 0.070242 | H                              | 3.703864 | -0.88205 | 1.197401 |
| H                                | -3.42269 | -0.02391 | 0.578759 | H                              | 4.951887 | -2.66295 | -0.0059  |
| H                                | -4.14306 | -4.15582 | -0.46735 | C                              | -1.31116 | -1.3218  | 0.014774 |
| C                                | -5.45532 | -1.83908 | 0.19723  | C                              | -2.55611 | -1.20115 | 0.667664 |
| H                                | -5.93682 | -1.78924 | -0.79682 | C                              | -0.80383 | -0.17072 | -0.62428 |
| H                                | -5.93976 | -2.66388 | 0.747443 | C                              | -3.25217 | 0.006237 | 0.694479 |
| H                                | -5.67974 | -0.89663 | 0.722186 | H                              | -2.97545 | -2.06628 | 1.172151 |
|                                  |          |          |          | C                              | -1.50656 | 1.033097 | -0.6253  |
|                                  |          |          |          | H                              | 0.150393 | -0.22806 | -1.13904 |
|                                  |          |          |          | C                              | -2.73073 | 1.125401 | 0.041144 |

|                                  |          |          |          |                                  |          |          |          |
|----------------------------------|----------|----------|----------|----------------------------------|----------|----------|----------|
| H                                | -4.20129 | 0.075394 | 1.218158 | C                                | -1.98469 | -1.73483 | -5.83461 |
| H                                | -1.10017 | 1.899723 | -1.13879 | H                                | -1.75    | -0.37519 | -4.19393 |
| H                                | -3.276   | 2.064834 | 0.051101 | C                                | -2.62183 | -3.99366 | -5.25779 |
| C                                | -1.30576 | -4.02931 | -0.01315 | H                                | -2.853   | -4.3997  | -3.16533 |
| C                                | -2.55177 | -4.15475 | -0.66311 | C                                | -2.30935 | -3.03589 | -6.22534 |
| C                                | -0.79229 | -5.17851 | 0.624372 | H                                | -1.73621 | -0.98806 | -6.58309 |
| C                                | -3.24304 | -5.36491 | -0.68861 | H                                | -2.88083 | -5.0052  | -5.55704 |
| H                                | -2.97577 | -3.29117 | -1.16636 | H                                | -2.31917 | -3.30173 | -7.2785  |
| C                                | -1.49017 | -6.38514 | 0.626696 | N                                | -5.76601 | -3.02427 | -3.6293  |
| H                                | 0.162927 | -5.11744 | 1.136857 | C                                | -5.69666 | -2.11902 | -4.421   |
| C                                | -2.71553 | -6.48216 | -0.03687 | O                                | -5.64555 | -1.33089 | -5.29974 |
| H                                | -4.19313 | -5.43775 | -1.21003 | C                                | -5.75766 | -3.26428 | -2.25241 |
| H                                | -1.07906 | -7.25028 | 1.138941 | C                                | -5.98865 | -2.23833 | -1.32733 |
| H                                | -3.25706 | -7.42377 | -0.04582 | C                                | -5.51316 | -4.56563 | -1.80373 |
|                                  |          |          |          | C                                | -5.9739  | -2.5255  | 0.033971 |
|                                  |          |          |          | H                                | -6.16689 | -1.22788 | -1.67787 |
| <b>IM1</b>                       |          |          |          | C                                | -5.49541 | -4.83235 | -0.43759 |
| Gibbs Free Energy = -1158.975603 |          |          |          | H                                | -5.33011 | -5.35107 | -2.52872 |
| B                                | -2.32189 | -1.9472  | -1.9693  | C                                | -5.72962 | -3.82285 | 0.504481 |
| C                                | -1.91083 | -2.99568 | -0.88489 | H                                | -6.14386 | -1.72174 | 0.744892 |
| C                                | -0.97607 | -4.01456 | -1.1682  | H                                | -5.2881  | -5.84267 | -0.09694 |
| C                                | -2.45389 | -2.96771 | 0.416859 | C                                | -5.72197 | -4.12393 | 1.980615 |
| C                                | -0.59935 | -4.95044 | -0.20671 | H                                | -6.72154 | -4.41172 | 2.330459 |
| H                                | -0.5299  | -4.06346 | -2.15655 | H                                | -5.04485 | -4.95048 | 2.213051 |
| C                                | -2.09694 | -3.91089 | 1.37922  | H                                | -5.41333 | -3.25124 | 2.563575 |
| H                                | -3.18295 | -2.20644 | 0.668397 |                                  |          |          |          |
| C                                | -1.16548 | -4.90409 | 1.069628 | <b>TS1</b>                       |          |          |          |
| H                                | 0.131284 | -5.71644 | -0.45024 | Gibbs Free Energy = -1158.943045 |          |          |          |
| H                                | -2.54162 | -3.87123 | 2.369064 |                                  |          |          |          |
| H                                | -0.88009 | -5.63671 | 1.819229 | B                                | -2.93889 | -1.8858  | -1.89246 |
| C                                | -2.74761 | -0.50139 | -1.54705 | C                                | -1.92066 | -2.36189 | -0.73069 |
| C                                | -3.6832  | 0.238635 | -2.30148 | C                                | -0.67574 | -2.95077 | -1.00978 |
| C                                | -2.22534 | 0.116163 | -0.39148 | C                                | -2.25219 | -2.20868 | 0.630148 |
| C                                | -4.09767 | 1.510568 | -1.91089 | C                                | 0.197697 | -3.35004 | 0.004921 |
| H                                | -4.09806 | -0.19394 | -3.20526 | H                                | -0.38361 | -3.11444 | -2.0419  |
| C                                | -2.61584 | 1.397938 | -0.00596 | C                                | -1.38932 | -2.60253 | 1.653264 |
| H                                | -1.49227 | -0.41507 | 0.207364 | H                                | -3.21252 | -1.7782  | 0.902398 |
| C                                | -3.56193 | 2.094841 | -0.76055 | C                                | -0.15399 | -3.17508 | 1.343545 |
| H                                | -4.83144 | 2.048738 | -2.50408 | H                                | 1.151176 | -3.80404 | -0.25209 |
| H                                | -2.18733 | 1.852183 | 0.882829 | H                                | -1.68332 | -2.46882 | 2.690939 |
| H                                | -3.87653 | 3.089234 | -0.45692 | H                                | 0.521058 | -3.48698 | 2.13543  |
| C                                | -2.30012 | -2.33861 | -3.48275 | C                                | -3.06535 | -0.19676 | -2.01701 |
| C                                | -1.99339 | -1.39276 | -4.48354 | C                                | -3.51524 | 0.39232  | -3.23306 |
| C                                | -2.6018  | -3.64962 | -3.90761 |                                  |          |          |          |

|                                  |          |          |          |   |          |          |          |
|----------------------------------|----------|----------|----------|---|----------|----------|----------|
| C                                | -2.52194 | 0.68119  | -1.03968 | C | 1.145263 | -0.63196 | 2.276991 |
| C                                | -3.47047 | 1.763769 | -3.43976 | C | 3.370377 | -2.20935 | 1.706488 |
| H                                | -3.92178 | -0.25418 | -4.00447 | H | 2.819962 | -1.97406 | -0.35489 |
| C                                | -2.46763 | 2.052028 | -1.24557 | C | 1.953213 | -1.09095 | 3.313992 |
| H                                | -2.15133 | 0.264171 | -0.10928 | H | 0.275089 | -0.02708 | 2.511875 |
| C                                | -2.94968 | 2.594956 | -2.44271 | C | 3.066007 | -1.88801 | 3.03035  |
| H                                | -3.83429 | 2.190558 | -4.36906 | H | 4.232756 | -2.83005 | 1.481295 |
| H                                | -2.05166 | 2.704065 | -0.48385 | H | 1.715472 | -0.83498 | 4.342395 |
| H                                | -2.91399 | 3.668934 | -2.6004  | H | 3.692135 | -2.25561 | 3.838231 |
| C                                | -2.72112 | -2.52678 | -3.35082 | C | -0.94381 | 2.069359 | -1.08533 |
| C                                | -1.57339 | -2.1904  | -4.09562 | C | -1.34182 | 2.74855  | -2.24361 |
| C                                | -3.63682 | -3.3977  | -3.96253 | C | 0.032797 | 2.632127 | -0.25305 |
| C                                | -1.33616 | -2.71446 | -5.36568 | C | -0.74202 | 3.95641  | -2.58678 |
| H                                | -0.85678 | -1.48826 | -3.67607 | H | -2.10777 | 2.308895 | -2.87309 |
| C                                | -3.41307 | -3.92719 | -5.23739 | C | 0.618552 | 3.851486 | -0.58849 |
| H                                | -4.54965 | -3.67035 | -3.44281 | H | 0.325273 | 2.12633  | 0.661089 |
| C                                | -2.25787 | -3.59246 | -5.9429  | C | 0.239938 | 4.509637 | -1.75968 |
| H                                | -0.4382  | -2.43324 | -5.90953 | H | -1.03769 | 4.468132 | -3.49739 |
| H                                | -4.14486 | -4.59883 | -5.6786  | H | 1.369829 | 4.286135 | 0.06337  |
| H                                | -2.08028 | -4.00169 | -6.93338 | H | 0.705181 | 5.453724 | -2.02642 |
| N                                | -4.44699 | -2.04845 | -1.36732 | C | 1.191834 | -0.05743 | -1.63079 |
| C                                | -4.8184  | -0.81322 | -1.27938 | C | 2.492847 | 0.461181 | -1.76801 |
| O                                | -5.64218 | -0.01864 | -0.97412 | C | 0.472708 | -0.33928 | -2.80816 |
| C                                | -5.20946 | -3.15032 | -0.88228 | C | 3.04265  | 0.714321 | -3.02335 |
| C                                | -6.53957 | -3.01364 | -0.47703 | H | 3.071499 | 0.685938 | -0.87701 |
| C                                | -4.58273 | -4.4003  | -0.81713 | C | 1.024049 | -0.11015 | -4.06746 |
| C                                | -7.23255 | -4.12946 | -0.00948 | H | -0.53113 | -0.74868 | -2.7356  |
| H                                | -7.03425 | -2.05046 | -0.52595 | C | 2.309188 | 0.425435 | -4.17691 |
| C                                | -5.29259 | -5.50089 | -0.3497  | H | 4.041549 | 1.132908 | -3.1051  |
| H                                | -3.55056 | -4.50304 | -1.12725 | H | 0.453294 | -0.34358 | -4.96154 |
| C                                | -6.62767 | -5.38918 | 0.064634 | H | 2.738399 | 0.615088 | -5.15649 |
| H                                | -8.26673 | -4.01431 | 0.302128 | N | -0.86604 | -0.16216 | -0.0326  |
| H                                | -4.79685 | -6.46663 | -0.30378 | C | -1.62861 | 0.78731  | -0.74327 |
| C                                | -7.37732 | -6.59159 | 0.577738 | O | -2.81023 | 0.607151 | -1.00855 |
| H                                | -7.36083 | -7.41029 | -0.15034 | C | -1.6099  | -1.07927 | 0.785838 |
| H                                | -6.926   | -6.97491 | 1.500434 | C | -2.47538 | -0.60456 | 1.777606 |
| H                                | -8.42172 | -6.349   | 0.790915 | C | -1.4436  | -2.45351 | 0.621259 |
|                                  |          |          |          | C | -3.15217 | -1.5009  | 2.596529 |
|                                  |          |          |          | H | -2.60591 | 0.464744 | 1.908174 |
|                                  |          |          |          | C | -2.11733 | -3.34515 | 1.45706  |
|                                  |          |          |          | H | -0.78223 | -2.8238  | -0.1557  |
|                                  |          |          |          | C | -2.98249 | -2.88769 | 2.455634 |
|                                  |          |          |          | H | -3.81806 | -1.12045 | 3.36665  |
|                                  |          |          |          | H | -1.97111 | -4.41336 | 1.323818 |
| <b>IM2</b>                       |          |          |          |   |          |          |          |
| Gibbs Free Energy = -1159.010212 |          |          |          |   |          |          |          |
| B                                | 0.565165 | -0.36241 | -0.23331 | C |          |          |          |
| C                                | 1.434404 | -0.93417 | 0.931003 | H |          |          |          |
| C                                | 2.56892  | -1.72655 | 0.671973 | H |          |          |          |



|                                  |          |          |          |                                  |          |          |          |
|----------------------------------|----------|----------|----------|----------------------------------|----------|----------|----------|
| C                                | -3.72301 | -3.84603 | 3.353022 | O                                | 1.510135 | 1.980396 | 1.4249   |
| H                                | -3.41618 | -4.87954 | 3.171635 | C                                | -0.44648 | -0.69082 | 2.86963  |
| H                                | -3.5441  | -3.61957 | 4.410136 | C                                | 0.557029 | -1.64681 | 3.080981 |
| H                                | -4.80572 | -3.784   | 3.191273 | C                                | -1.78708 | -1.03345 | 3.057711 |
| <b>IM3</b>                       |          |          |          | C                                | 0.206477 | -2.93599 | 3.467846 |
| Gibbs Free Energy = -1158.975056 |          |          |          | H                                | 1.596441 | -1.37535 | 2.928211 |
| B                                | 0.32696  | 0.890331 | -1.48047 | C                                | -2.11899 | -2.33009 | 3.44555  |
| C                                | 0.840315 | 2.217539 | -2.12749 | H                                | -2.5541  | -0.28917 | 2.877311 |
| C                                | -0.02815 | 3.053726 | -2.85916 | C                                | -1.13457 | -3.30271 | 3.658006 |
| C                                | 2.181443 | 2.634452 | -1.99799 | H                                | 0.98978  | -3.67286 | 3.623864 |
| C                                | 0.420674 | 4.234194 | -3.44976 | H                                | -3.16479 | -2.59125 | 3.580415 |
| H                                | -1.06866 | 2.7649   | -2.97416 | C                                | -1.49626 | -4.69824 | 4.097286 |
| C                                | 2.631333 | 3.827434 | -2.56114 | H                                | -0.90789 | -5.45004 | 3.561324 |
| H                                | 2.873443 | 2.021132 | -1.42966 | H                                | -1.29988 | -4.83861 | 5.167516 |
| C                                | 1.752197 | 4.626733 | -3.29595 | H                                | -2.55576 | -4.90736 | 3.926221 |
| H                                | -0.26603 | 4.851666 | -4.02175 | <b>TS2</b>                       |          |          |          |
| H                                | 3.665451 | 4.133628 | -2.43152 | Gibbs Free Energy = -1158.913464 |          |          |          |
| H                                | 2.102771 | 5.551913 | -3.74449 | B                                | -3.76829 | 1.555979 | 1.686063 |
| C                                | -1.12009 | 0.832729 | -0.89006 | C                                | -3.24336 | 3.051493 | 1.507267 |
| C                                | -1.8876  | -0.35065 | -0.90271 | C                                | -3.70303 | 3.862333 | 0.45545  |
| C                                | -1.69937 | 1.970409 | -0.28944 | C                                | -2.25168 | 3.583917 | 2.346559 |
| C                                | -3.16622 | -0.39726 | -0.35023 | C                                | -3.18916 | 5.142438 | 0.240258 |
| H                                | -1.47732 | -1.24443 | -1.3623  | H                                | -4.48429 | 3.488734 | -0.20262 |
| C                                | -2.96597 | 1.925052 | 0.290392 | C                                | -1.73674 | 4.86625  | 2.146234 |
| H                                | -1.13341 | 2.896194 | -0.25702 | H                                | -1.87942 | 2.986416 | 3.174652 |
| C                                | -3.70536 | 0.740414 | 0.255522 | C                                | -2.20255 | 5.64989  | 1.088482 |
| H                                | -3.73915 | -1.31937 | -0.38263 | H                                | -3.56245 | 5.746144 | -0.58266 |
| H                                | -3.37932 | 2.810811 | 0.763979 | H                                | -0.97312 | 5.254658 | 2.8149   |
| H                                | -4.69715 | 0.703807 | 0.697208 | H                                | -1.80451 | 6.648105 | 0.929765 |
| C                                | 1.257687 | -0.36385 | -1.41107 | C                                | -5.42281 | 1.39793  | 1.62646  |
| C                                | 2.287376 | -0.57312 | -2.35302 | C                                | -6.0596  | 0.286283 | 1.003534 |
| C                                | 1.112663 | -1.33147 | -0.39417 | C                                | -6.25786 | 2.476789 | 2.041639 |
| C                                | 3.122616 | -1.68718 | -2.28705 | C                                | -7.43562 | 0.222696 | 0.878606 |
| H                                | 2.425512 | 0.144948 | -3.15527 | H                                | -5.44407 | -0.53625 | 0.654244 |
| C                                | 1.958004 | -2.43558 | -0.30607 | C                                | -7.63931 | 2.413114 | 1.921735 |
| H                                | 0.329339 | -1.21258 | 0.344271 | H                                | -5.79458 | 3.348375 | 2.493588 |
| C                                | 2.964446 | -2.61805 | -1.25719 | C                                | -8.22672 | 1.280744 | 1.352229 |
| H                                | 3.89934  | -1.82892 | -3.03303 | H                                | -7.9072  | -0.63985 | 0.418579 |
| H                                | 1.827871 | -3.15248 | 0.499401 | H                                | -8.25953 | 3.233045 | 2.269032 |
| H                                | 3.62113  | -3.4814  | -1.19829 | H                                | -9.30772 | 1.221956 | 1.264992 |
| N                                | -0.14093 | 0.609465 | 2.457087 | C                                | -2.97491 | 0.424166 | 0.880779 |
| C                                | 0.739554 | 1.241632 | 1.931659 | C                                | -2.53289 | 0.661533 | -0.43264 |

|                                  |          |          |          |                                  |          |          |          |
|----------------------------------|----------|----------|----------|----------------------------------|----------|----------|----------|
| C                                | -2.72753 | -0.85122 | 1.418148 | H                                | 3.326387 | -0.31791 | 0.474243 |
| C                                | -1.88411 | -0.32354 | -1.17792 | C                                | 2.948041 | -2.99755 | 2.524473 |
| H                                | -2.69236 | 1.640085 | -0.8775  | H                                | 1.110239 | -4.08964 | 2.810754 |
| C                                | -2.07372 | -1.84301 | 0.683436 | H                                | 4.616775 | -1.71971 | 2.044684 |
| H                                | -3.04427 | -1.07625 | 2.432794 | H                                | 3.516583 | -3.61667 | 3.212629 |
| C                                | -1.65141 | -1.5832  | -0.62112 | C                                | 1.248907 | 0.368235 | -1.39074 |
| H                                | -1.55403 | -0.10718 | -2.19049 | C                                | 0.660069 | 1.596792 | -1.74757 |
| H                                | -1.8937  | -2.8173  | 1.13004  | C                                | 2.383318 | -0.04432 | -2.11446 |
| H                                | -1.14271 | -2.35169 | -1.19621 | C                                | 1.183073 | 2.384957 | -2.77184 |
| N                                | -5.74057 | 0.291855 | 4.107843 | H                                | -0.21399 | 1.951276 | -1.20486 |
| C                                | -4.87873 | 0.813858 | 3.411954 | C                                | 2.903131 | 0.730129 | -3.15178 |
| O                                | -3.67589 | 1.17931  | 3.284782 | H                                | 2.856748 | -0.9902  | -1.86881 |
| C                                | -5.59849 | -0.38914 | 5.335819 | C                                | 2.306413 | 1.949647 | -3.4787  |
| C                                | -4.35676 | -0.55838 | 5.967859 | H                                | 0.718108 | 3.334779 | -3.01964 |
| C                                | -6.75285 | -0.91172 | 5.924601 | H                                | 3.773195 | 0.385725 | -3.70329 |
| C                                | -4.28859 | -1.24606 | 7.174634 | H                                | 2.714582 | 2.558273 | -4.28038 |
| H                                | -3.45824 | -0.1496  | 5.517889 | O                                | -0.72883 | -0.53535 | -0.06181 |
| C                                | -6.667   | -1.59614 | 7.135251 | H                                | -1.20573 | -0.03429 | -0.73956 |
| H                                | -7.70625 | -0.77319 | 5.425561 |                                  |          |          |          |
| C                                | -5.43764 | -1.77824 | 7.780306 | <b>3a</b>                        |          |          |          |
| H                                | -3.32389 | -1.37144 | 7.659088 | Gibbs Free Energy = -671.3860386 |          |          |          |
| H                                | -7.57077 | -1.99613 | 7.58617  |                                  |          |          |          |
| C                                | -5.33934 | -2.53658 | 9.078945 | C                                | -1.00351 | 2.227066 | -0.97432 |
| H                                | -4.87645 | -3.51946 | 8.927405 | C                                | -1.57168 | 3.120689 | -1.89212 |
| H                                | -4.72155 | -2.00055 | 9.807139 | C                                | 0.379501 | 2.265723 | -0.74522 |
| H                                | -6.32559 | -2.69903 | 9.521917 | C                                | -0.7694  | 4.019365 | -2.58985 |
|                                  |          |          |          | H                                | -2.64456 | 3.094575 | -2.04692 |
| <b>H<sub>2</sub>O</b>            |          |          |          | C                                | 1.180256 | 3.172542 | -1.43867 |
| Gibbs Free Energy = -76.46416249 |          |          |          | H                                | 0.83749  | 1.616674 | -0.00469 |
|                                  |          |          |          | C                                | 0.609352 | 4.045957 | -2.36581 |
| O                                | -0.79718 | -0.20389 | 0        | H                                | -1.21794 | 4.700481 | -3.30644 |
| H                                | 0.168678 | -0.14992 | 0        | H                                | 2.248429 | 3.202004 | -1.24754 |
| H                                | -1.06875 | 0.724623 | 0        | H                                | 1.235191 | 4.749727 | -2.90606 |
|                                  |          |          |          | N                                | -1.36043 | 0.143768 | 0.211128 |
| <b>Ph<sub>2</sub>BOH</b>         |          |          |          | C                                | -1.93497 | 1.29681  | -0.25382 |
| Gibbs Free Energy = -564.1051826 |          |          |          | O                                | -3.12851 | 1.570585 | -0.11598 |
|                                  |          |          |          | C                                | -1.9468  | -0.89824 | 0.955017 |
| B                                | 0.627514 | -0.51062 | -0.24842 | C                                | -3.27863 | -0.89637 | 1.392287 |
| C                                | 1.471392 | -1.39197 | 0.731609 | C                                | -1.12524 | -1.98984 | 1.279082 |
| C                                | 0.86836  | -2.46418 | 1.417678 | C                                | -3.75887 | -1.97552 | 2.134787 |
| C                                | 2.834916 | -1.14514 | 0.977253 | H                                | -3.91862 | -0.06111 | 1.150057 |
| C                                | 1.594528 | -3.26299 | 2.298714 | C                                | -1.62468 | -3.05526 | 2.017966 |
| H                                | -0.1848  | -2.67047 | 1.250338 | H                                | -0.08894 | -1.99296 | 0.951173 |
| C                                | 3.566901 | -1.93337 | 1.865843 | C                                | -2.95501 | -3.07287 | 2.460836 |

|   |          |          |          |
|---|----------|----------|----------|
| H | -4.79314 | -1.95792 | 2.468401 |
| H | -0.96832 | -3.88772 | 2.257533 |
| C | -3.49929 | -4.24441 | 3.237837 |
| H | -3.75021 | -5.08069 | 2.572942 |
| H | -2.76834 | -4.61856 | 3.962087 |
| H | -4.40925 | -3.97383 | 3.780985 |
| H | -0.40098 | -0.023   | -0.05985 |

## 8. References

1. R. J. Mayer, N. Hampel and A. R. Ofial, Lewis Acidic Boranes, Lewis Bases, and Equilibrium Constants: A Reliable Scaffold for a Quantitative Lewis Acidity/Basicity Scale, *Chem. Eur. J.*, 2021, **27**, 4070–4080.
2. M. Wang, F. Nudelman, R. R. Matthes and M. P. Shaver, Frustrated Lewis Pair Polymers as Responsive Self-Healing Gels, *J. Am. Chem. Soc.*, 2017, **139**, 14232–14236.
3. D. Liu, Z. Tian, Z. Yan, L. Wu, Y. Ma, Q. Wang, W. Liu, H. Zhou and C. Yang, Design, synthesis and evaluation of 1,2-benzisothiazol-3-one derivatives as potent caspase-3 inhibitors, *Bioorg. Med. Chem.*, 2013, **21**, 2960–2967.
4. X. Zhou, G. Dong, T. Song, G. Wang, Z. Li, X. Qin, L. Du and M. Li, Environment-sensitive fluorescent inhibitors of histone deacetylase, *Bioorg. Med. Chem. Lett.*, 2020, **30**, 127128.
5. T. M. E. Dine, J. Rouden and J. Blanchet, Borinic acid catalysed peptide synthesis, *Chem. Commun.*, 2015, **51**, 16084–16087.
6. Y. Qiao, Q. Yang and E. J. Schelter, Photoinduced Miyaura Borylation by a Rare-Earth-Metal Photoreductant: The Hexachlorocerate(III) Anion, *Angew. Chem., Int. Ed.*, 2018, **57**, 10999–11003.
7. A. Sen, R. N. Dhital, T. Sato, A. Ohno and Y. M. A. Yamada, Switching from Biaryl Formation to Amidation with Convuluted Polymeric Nickel Catalysis, *ACS Catal.*, 2020, **10**, 14410–14418.
8. J.-B. Peng, D. Li, H.-Q. Geng and X.-F. Wu, Palladium-Catalyzed Amide Synthesis via Aminocarbonylation of Arylboronic Acids with Nitroarenes, *Org. Lett.*, 2019, **21**, 4878–4881.
9. N. Shen, C. W. Cheung and J.-A. Ma, Direct amide synthesis via Ni-mediated aminocarbonylation of arylboronic acids with CO and nitroarenes, *Chem. Commun.*, 2019, **55**, 13709–13712.
10. W.-T. Xu, B. Huang, J.-J. Dai, J. Xu and H.-J. Xu, Catalyst-Free Singlet Oxygen-Promoted Decarboxylative Amidation of  $\alpha$ -Keto Acids with Free Amines, *Org. Lett.*, 2016, **18**, 3114–3117.
11. Q.-H. Teng, G.-X. Sun, F.-P. Huang, K. Wang and F.-P. Liang, Visible-light Induced Cerium-Catalyzed *N*-Demethylation of *N*-Methyl Amides under Air Conditions, *Adv. Synth. Catal.*, 2023, **365**, 307–311.
12. I. A. P. S. Rajan, M. Subramani, G. Pushparathinam and D. S. Rajendran, Environmentally Benign Transamidation Protocol for Weakly Nucleophilic Aromatic Amines with *N*-Acyl-2-piperidinones: Catalyst-, Additive-, Base- and Solvent-Free Condition, *Asian J. Org. Chem.*, 2022, **11**, e202200378.
13. E. Qu, S. Li, J. Bai, Y. Zheng and W. Li, Nickel-Catalyzed Reductive Cross-Coupling of *N*-Acyl and *N*-Sulfonyl Benzotriazoles with Diverse Nitro Compounds: Rapid Access to Amides and Sulfonamides, *Org. Lett.*, 2022, **24**, 58–63.
14. H. Gao, L. Guo, Y. Zhu, C. Yang and W. Xia, Visible-light-induced dehydrogenative amidation of aldehydes

- enabled by iron salts, *Chem. Commun.*, 2023, **59**, 2771–2774.
15. R. D. Bradley and A. Bahamonde, Mild Amide *N*-Arylation Enabled by Nickel-Photoredox Catalysis, *Org. Lett.*, 2022, **24**, 7134–7139.
16. W. C. Fu and T. F. Jamison, Modular Continuous Flow Synthesis of Imatinib and Analogues, *Org. Lett.*, 2019, **21**, 6112–6116.
17. Y. Zhang, X. Ye, S. Liu, W. Chen, I. Majeed, T. Liu, Y. Zhu and Z. Zeng, NaOTs-promoted transition metal-free C–N bond cleavage to form C–X (X = N, O, S) bonds, *Org. Biomol. Chem.*, 2021, **19**, 8566–8571.
18. G. Liu, F. Hao, L. Liang, Z. Jin and J. Wu, Reductive Hydrodehalogenation of Halogenated Carboxylic Acid Derivatives Using a DMSO/HCOONa · 2H<sub>2</sub>O System, *Org. Lett.*, 2023, **25**, 2691–2695.
19. T. Zhou, G. Li, S. P. Nolan and M. Szostak, [Pd(NHC)(acac)Cl]: Well-Defined, Air-Stable, and Readily Available Precatalysts for Suzuki and Buchwald-Hartwig Cross-coupling (Transamidation) of Amides and Esters by N–C/O–C Activation, *Org. Lett.*, 2019, **21**, 3304–3309.
20. T. B. Gontijo, P. S. Lima, M. Y. Icimoto, R. L. Neves, É. C. Alvarenga, A. K. Carmona, A. A. Castro, T. C. Ramalho, E. N. S. Júnior and R. P. Freitas, Cathepsin K inhibitors based on 2-amino-1,3,4-oxadiazole derivatives, *Bioorg. Chem.*, 2021, **109**, 104662.
21. T. Alam, A. Rakshit, H. N. Dhara, A. Palai and B. K. Patel, Electrochemical Amidation: Benzoyl Hydrazine/Carbazate and Amine as Coupling Partners, *Org. Lett.*, 2022, **24**, 6619–6624.
22. M. J. Frisch, G. W. Trucks, H. B. Schlegel, G. E. Scuseria, M. A. Robb, J. R. Cheeseman, G. Scalmani, V. Barone, B. Mennucci, G. A. Petersson and et al., Gaussian 16, Revision A.03, *Gaussian, Inc., Wallingford, CT*, 2016.
23. C. Y. Legault, CYLview, 1.0b, Université de Sherbrooke, Sherbrooke (Québec) Canada, 2009, <http://www.cylview.org>.
24. A. D. Becke, Density-functional thermochemistry. III. The role of exact exchange, *J. Chem. Phys.*, 1993, **98**, 5648–5652.
25. C. Lee, W. Yang and R. G. Parr, Development of the Colle-Salvetti correlation-energy formula into a functional of the electron density, *Phys. Rev. B: Condens. Matter Mater. Phys.*, 1988, **37**, 785.
26. B. Miehlich, A. Savin, H. Stoll and H. Preuss, Results obtained with the correlation energy density functionals of becke and Lee, Yang and Parr, *Chem. Phys. Lett.*, 1989, **157**, 200–206.
27. G. A. Petersson, A. Bennett, T. G. Tensfeldt, M. A. Al-Laham, W. A. Shirley and J. Mantzaris, A complete basis set model chemistry. I. The total energies of closed-shell atoms and hydrides of the first-row elements. *J.*

*Chem. Phys.*, 1988, **89**, 2193–2218.

28. S. Grimme, J. Antony, S. Ehrlich and H. Krieg, A consistent and accurate *ab initio* parametrization of density functional dispersion correction (DFT-D) for the 94 elements H-Pu, *J. Chem. Phys.*, 2010, **132**, 154104.

29. A. V. Marenich, C. J. Cramer and D. G. Truhlar, Universal solvation model based on solute electron density and on a continuum model of the solvent defined by the bulk dielectric constant and atomic surface tensions, *J. Phys. Chem. B.*, 2009, **113**, 6378–6396.

30. K. Fukui, The Path of Chemical Reactions - the IRC Approach, *Acc. Chem. Res.*, 1981, **14**, 363–368.

31. M. J. Frisch, J. A. Pople and J. S. Binkley, Self-consistent molecular orbital methods 25. Supplementary functions for Gaussian basis sets, *J. Chem. Phys.*, 1984, **80**, 3265–3269.

32. R. Ditchfield, W. J. Hehre and J. A. Pople, Self-consistent molecular-orbital methods. IX. An extended Gaussian-type basis for molecular-orbital studies of organic molecules, *J. Chem. Phys.*, 1971, **54**, 724–728.

33. A. D. Becke, Density-functional exchange-energy approximation with correct asymptotic behavior, *Phys. Rev. A.*, 1988, **38**, 3098–3100.

34. J. P. Perdew, Density-functional approximation for the correlation energy of the inhomogeneous electron gas, *Phys. Rev. B.*, 1986, **33**, 8822–8824.

35. Y. Zhao and D. G. Truhlar, The M06 suite of density functionals for main group thermochemistry, thermochemical kinetics, noncovalent interactions, excited states, and transition elements: two new functionals and systematic testing of four M06-class functionals and 12 other functionals, *Theor. Chem. Acc.*, 2008, **120**, 215–241.

36. A. Schäfer, H. Horn and R. Ahlrichs, Fully optimized contracted Gaussian basis sets for atoms Li to Kr, *J. Chem. Phys.*, 1992, **97**, 2571–2577.

37. F. Weigend and R. Ahlrichs, Balanced basis sets of split valence, triple zeta valence and quadruple zeta valence quality for H to Rn: design and assessment of accuracy, *Phys. Chem. Chem. Phys.*, 2005, **7**, 3297–3305.

## 9. NMR spectra of the products

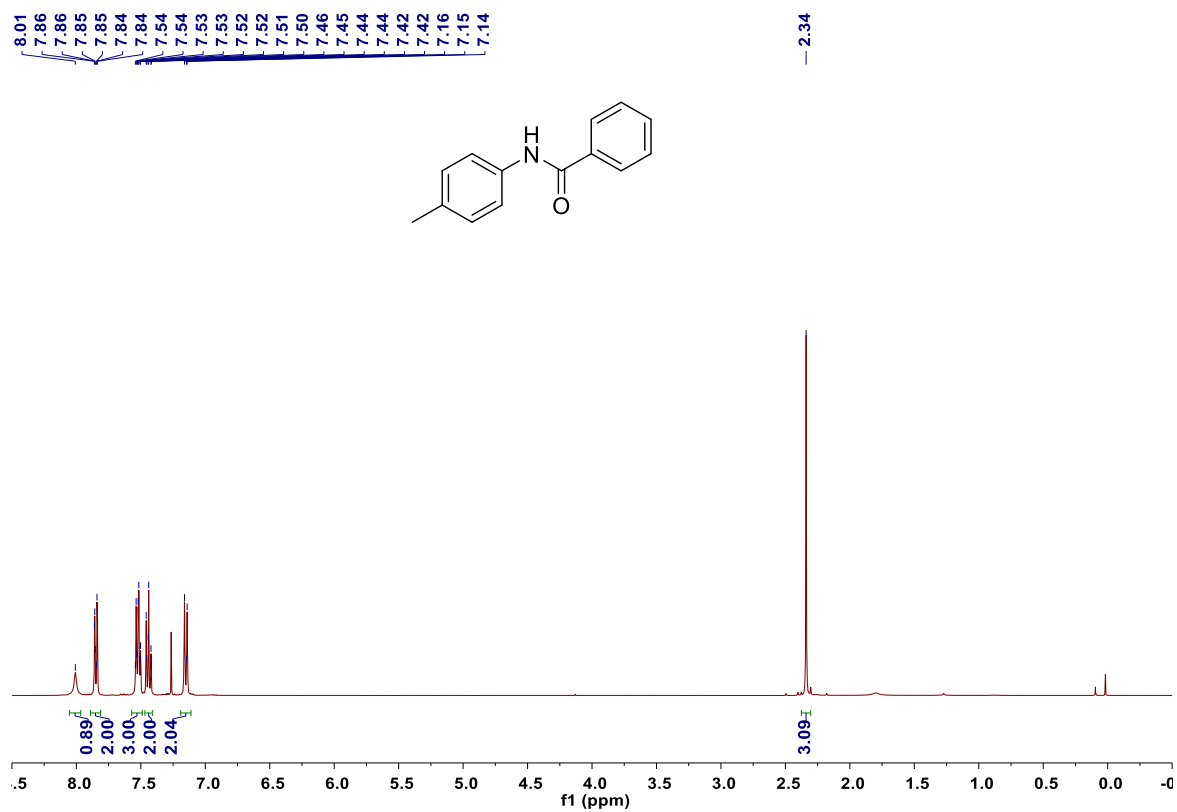

<sup>1</sup>H NMR spectrum for compound **3a** (CDCl<sub>3</sub>)

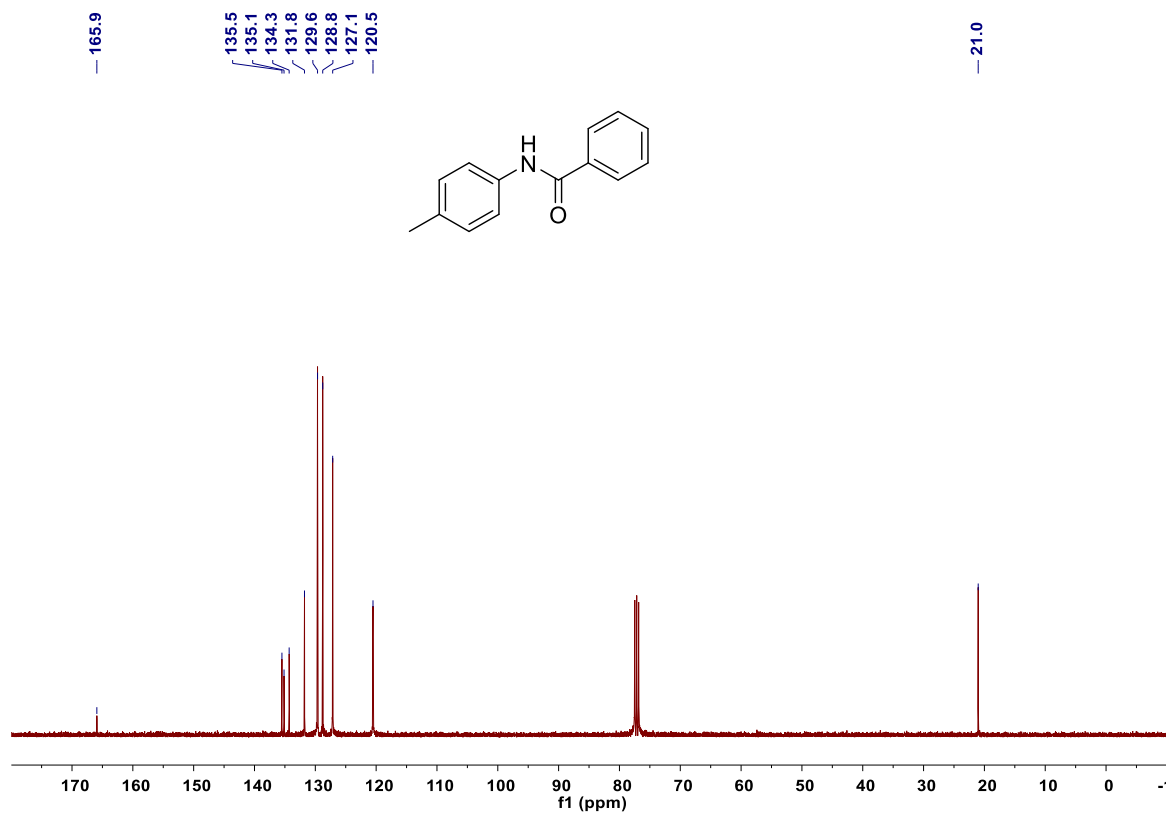

<sup>13</sup>C NMR spectrum for compound **3a** (CDCl<sub>3</sub>)

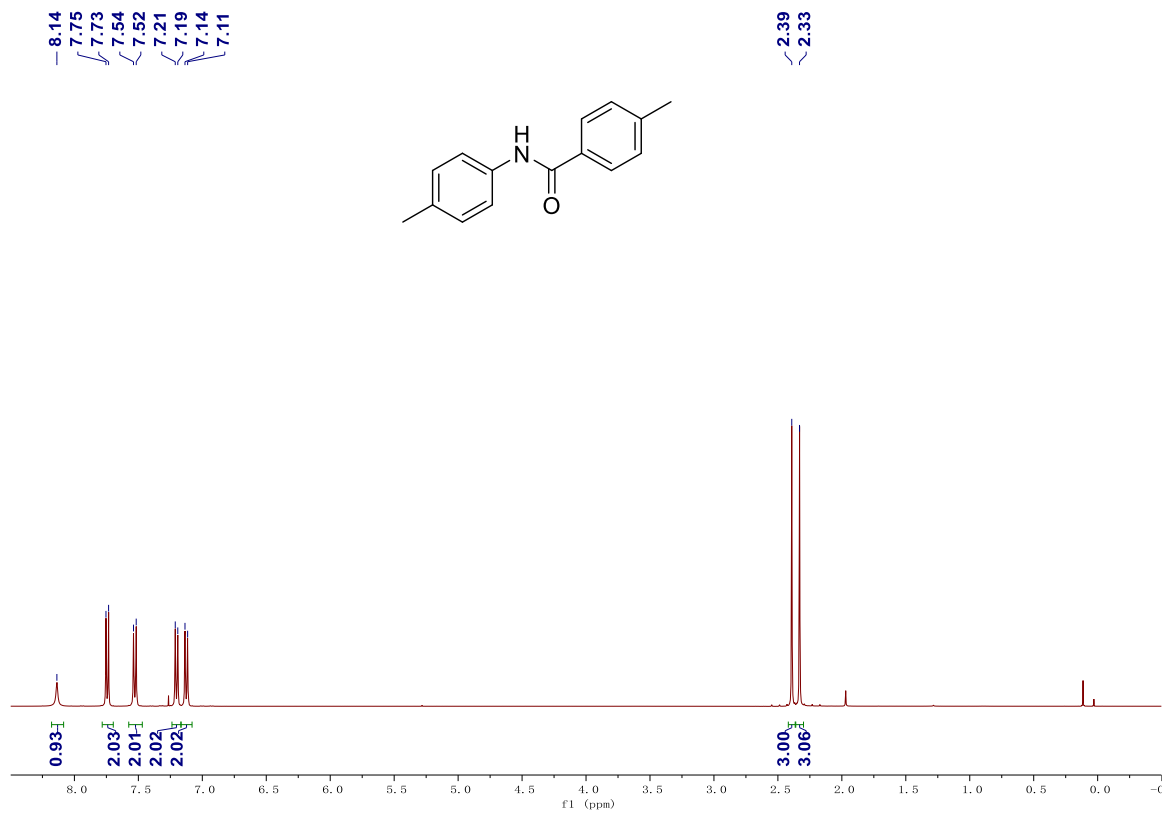

<sup>1</sup>H NMR spectrum for compound 3b (CDCl<sub>3</sub>)

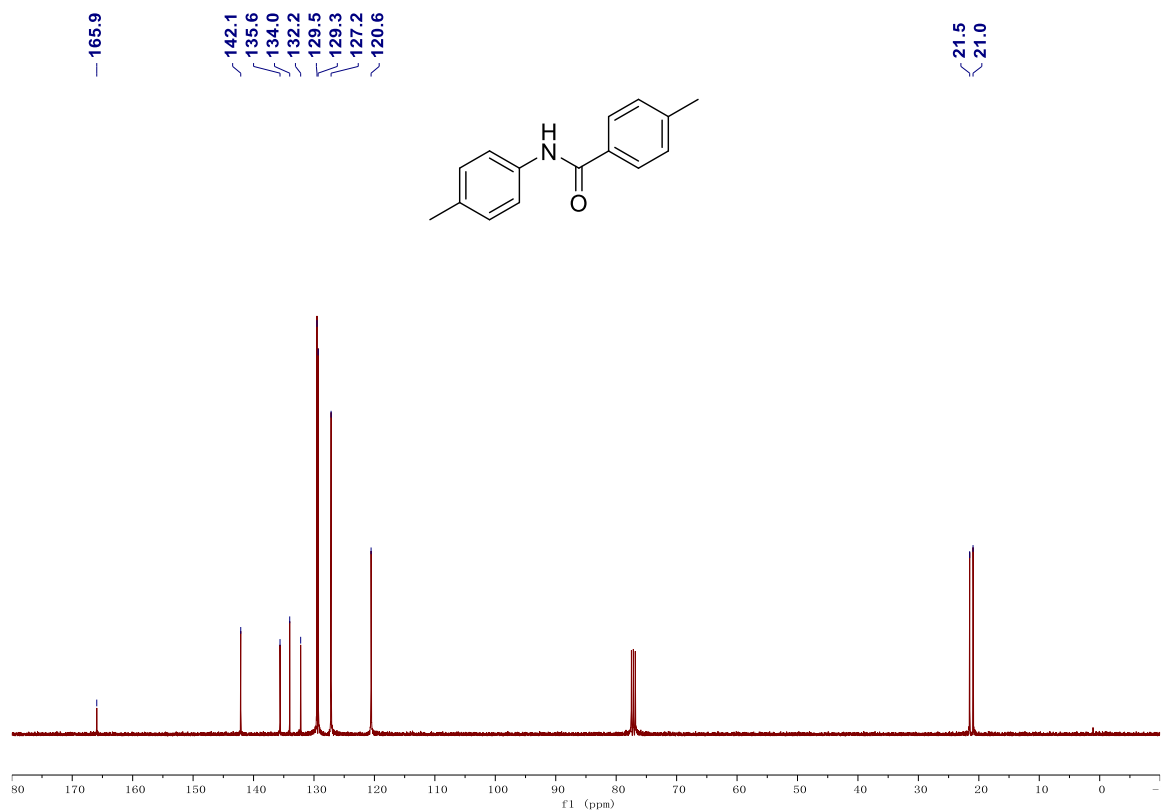

<sup>13</sup>C NMR spectrum for compound 3b (CDCl<sub>3</sub>)



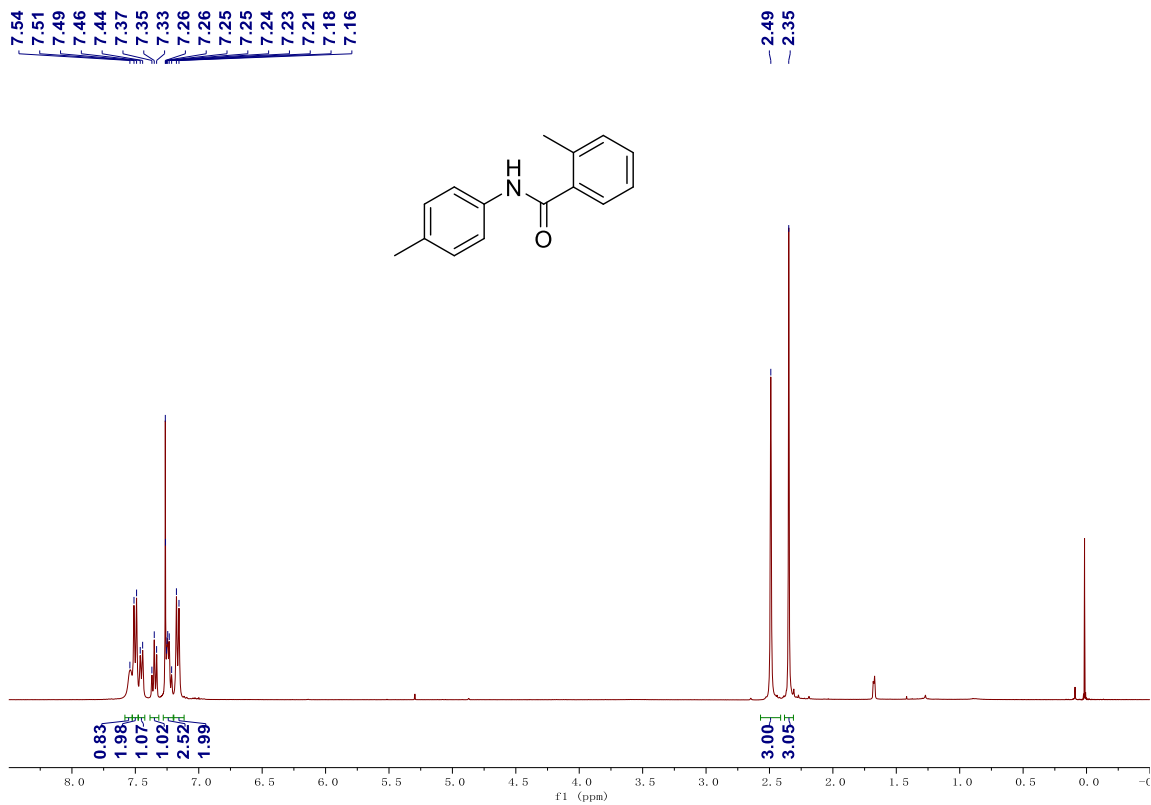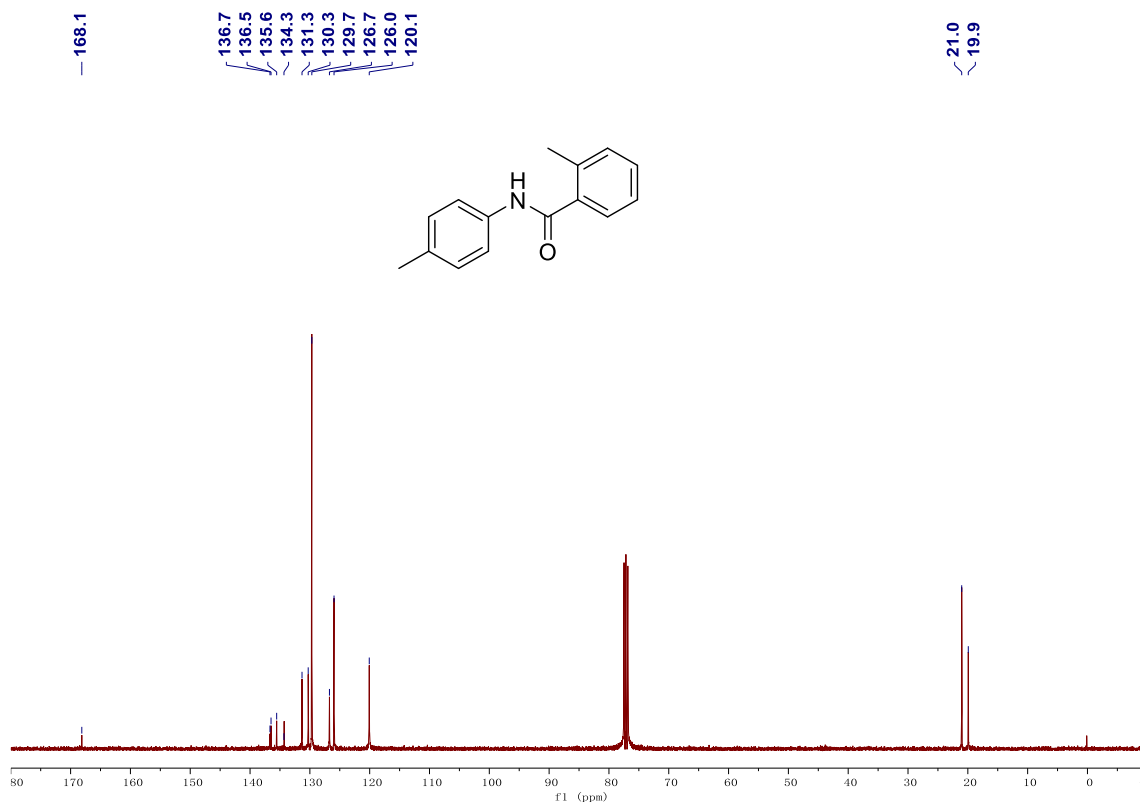

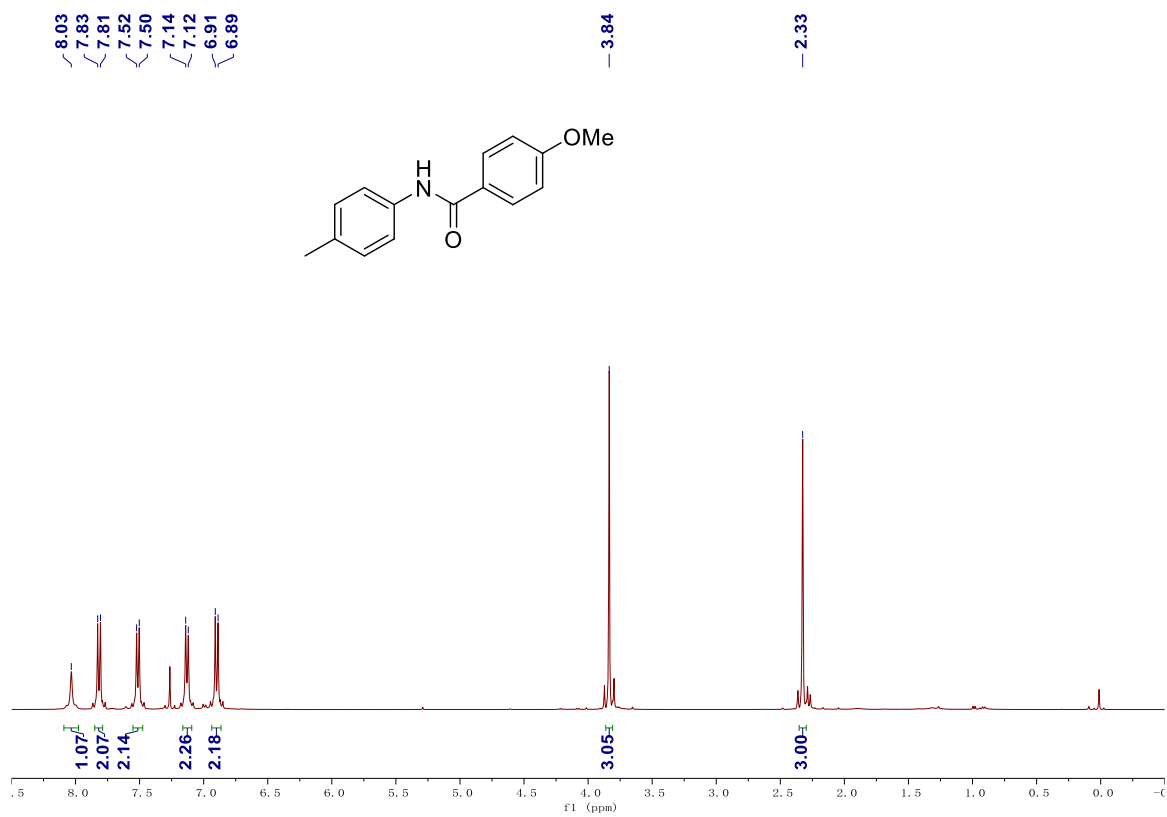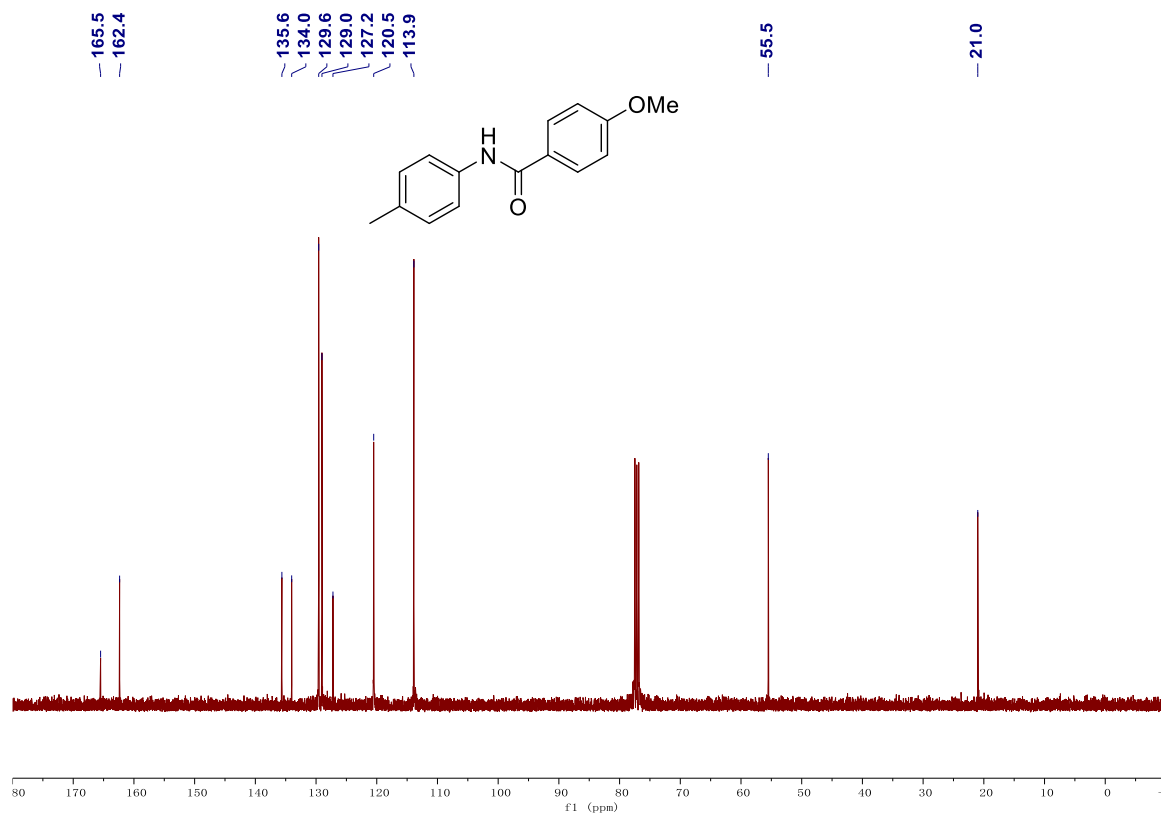

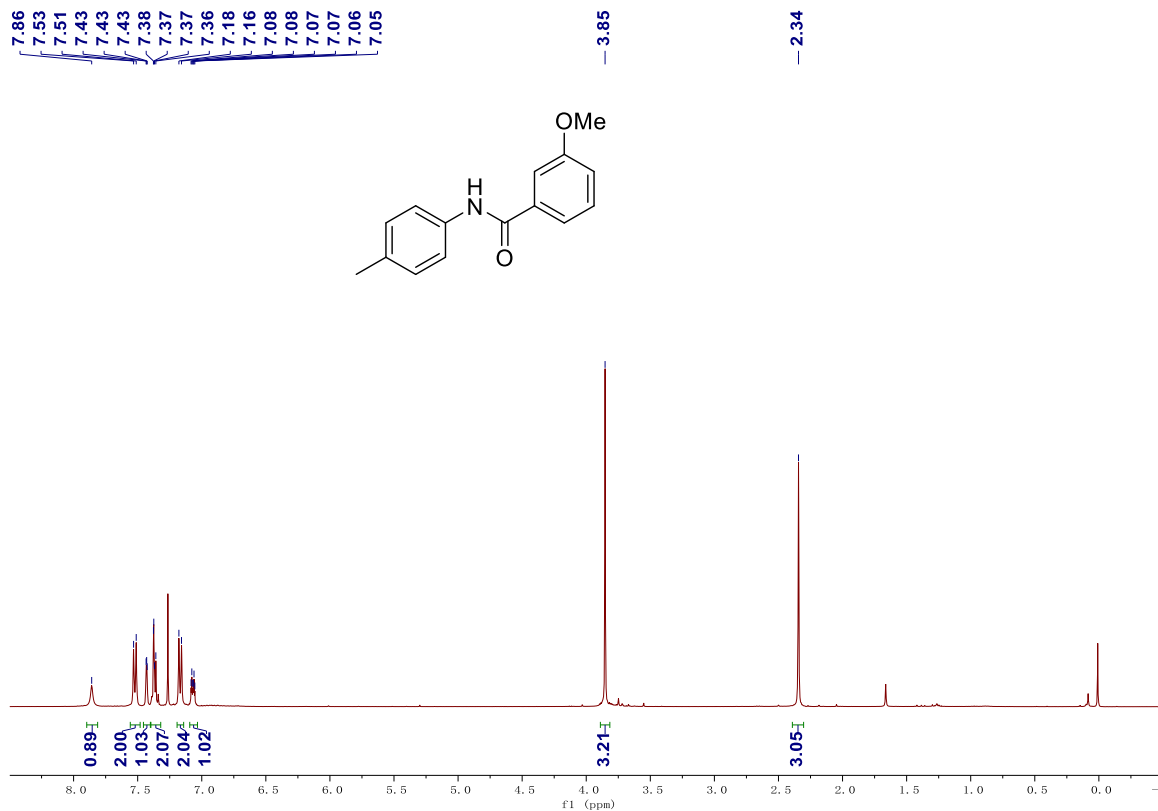

<sup>1</sup>H NMR spectrum for compound 3e (CDCl<sub>3</sub>)

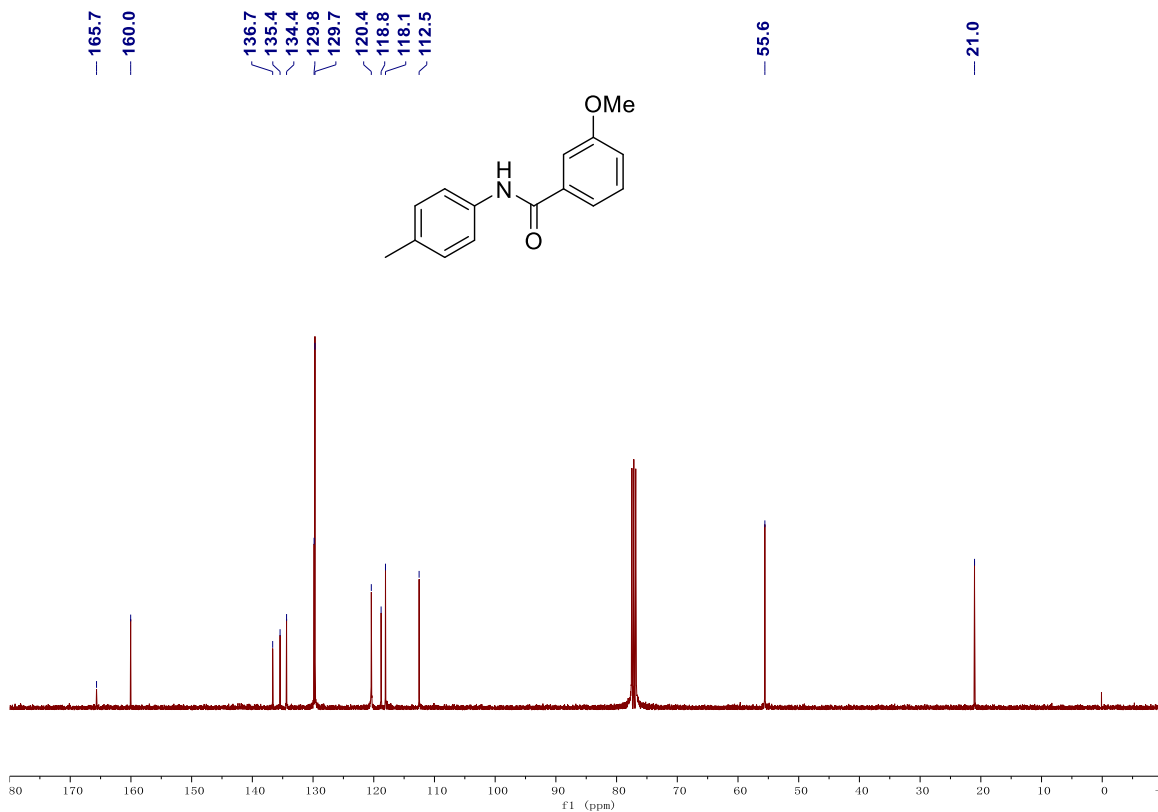

<sup>13</sup>C NMR spectrum for compound 3e (CDCl<sub>3</sub>)

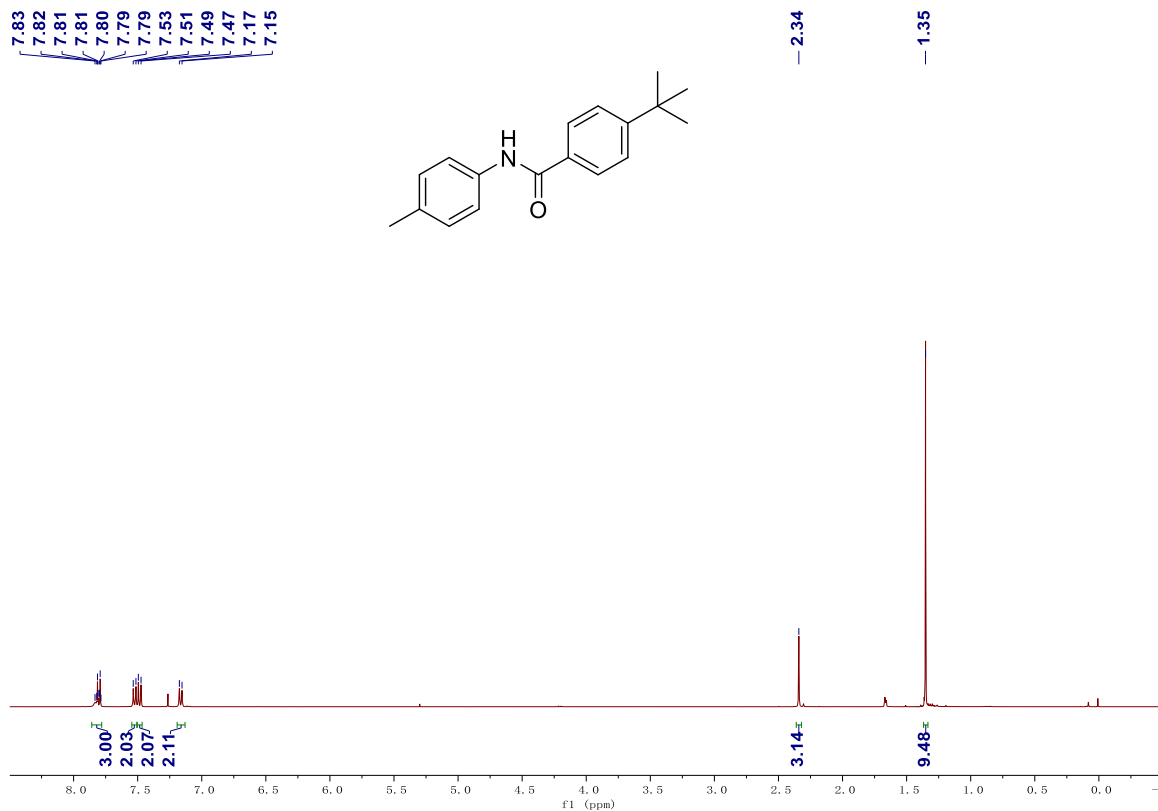

<sup>1</sup>H NMR spectrum for compound 3f (CDCl<sub>3</sub>)

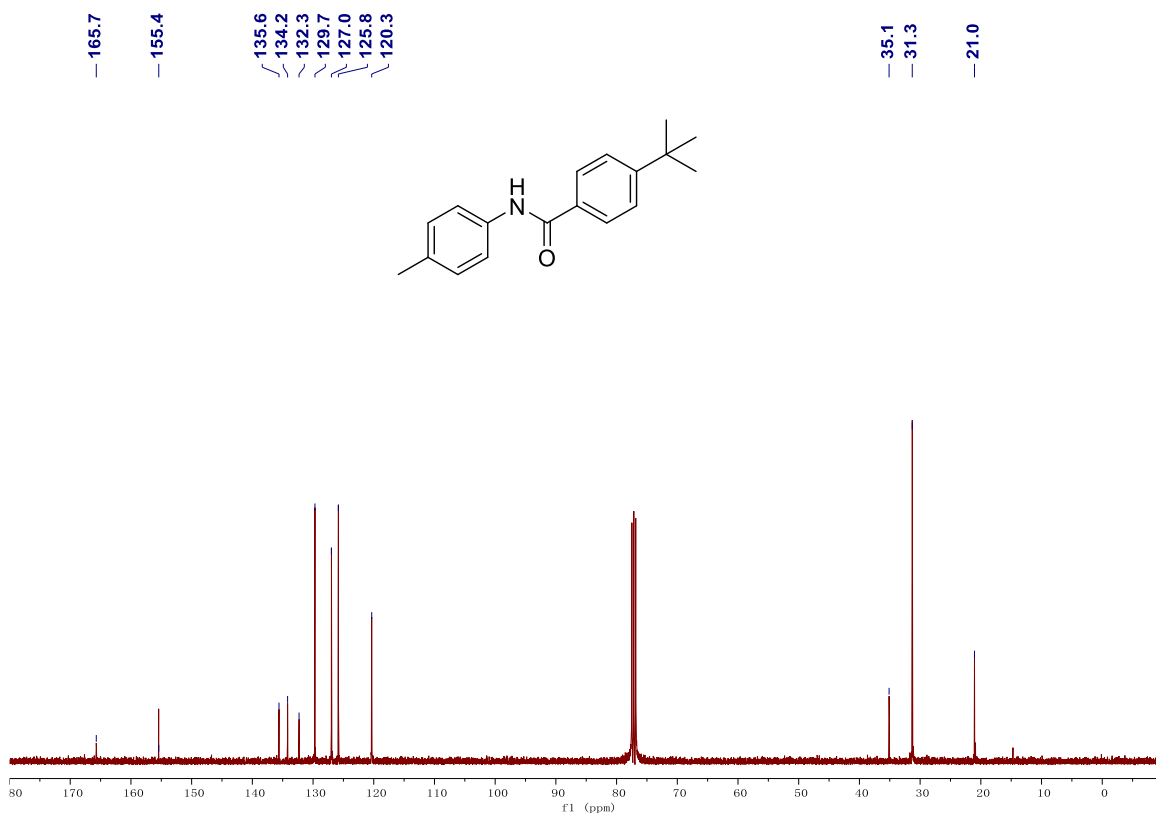

<sup>13</sup>C NMR spectrum for compound 3f (CDCl<sub>3</sub>)

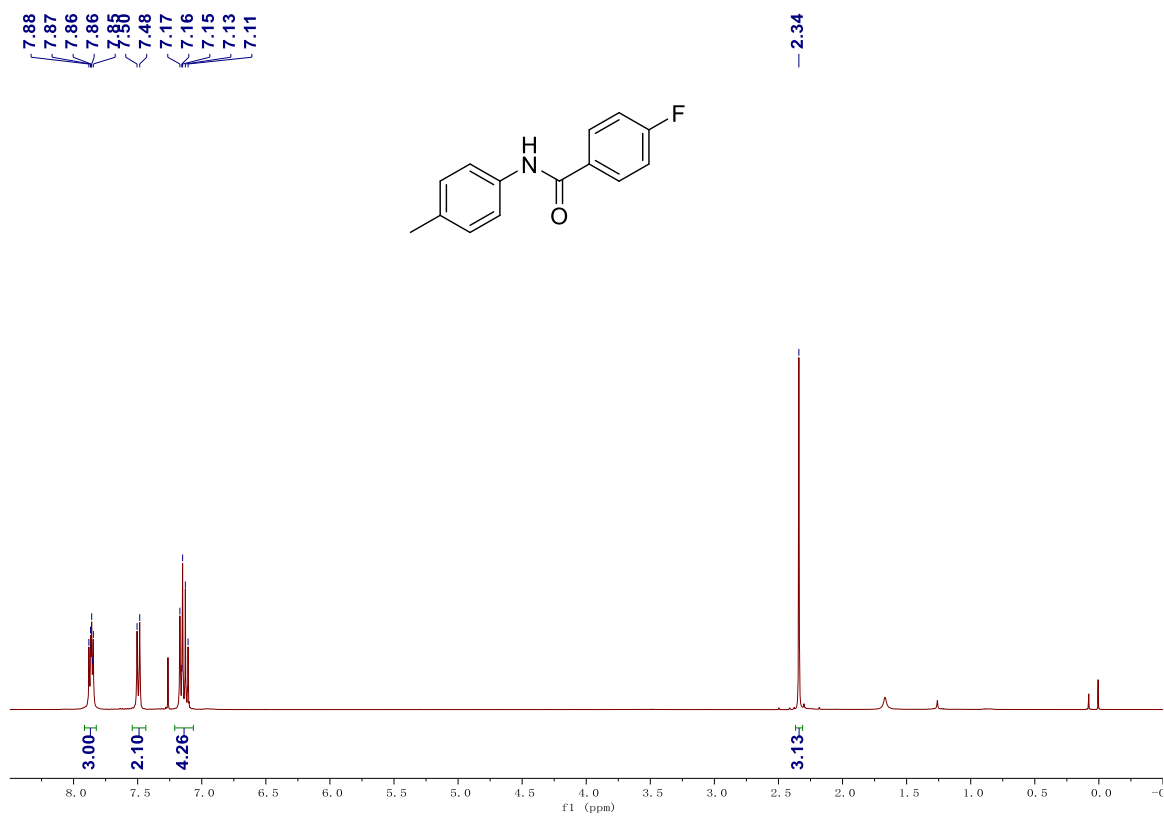

<sup>1</sup>H NMR spectrum for compound **3g** (CDCl<sub>3</sub>)

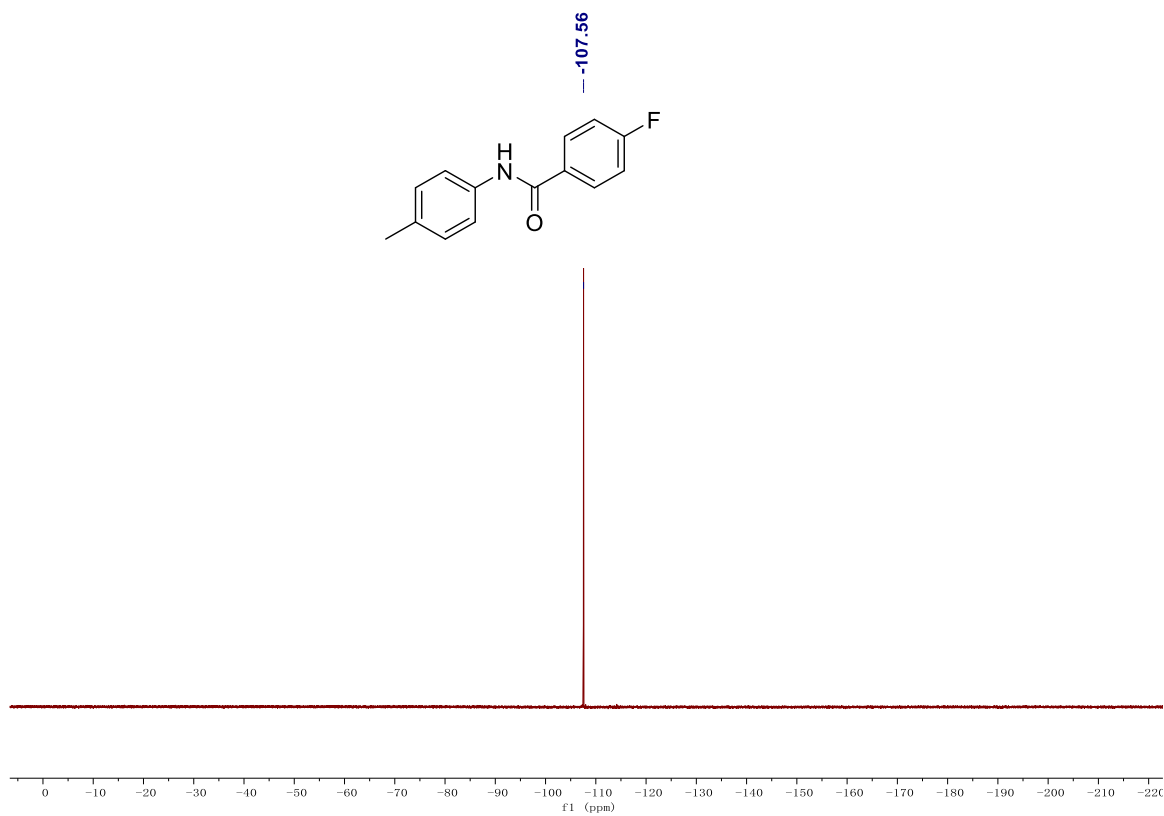

<sup>19</sup>F NMR spectrum for compound **3g** (CDCl<sub>3</sub>)

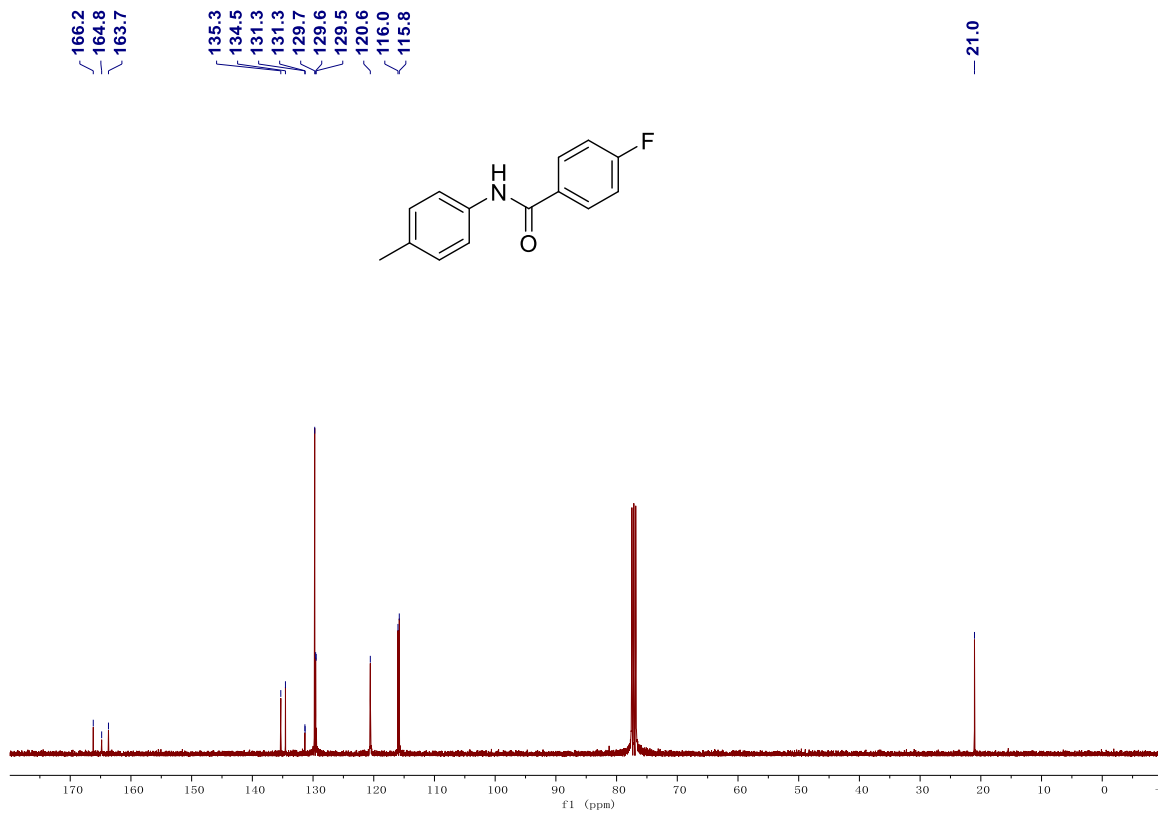

<sup>13</sup>C NMR spectrum for compound **3g** (CDCl<sub>3</sub>)

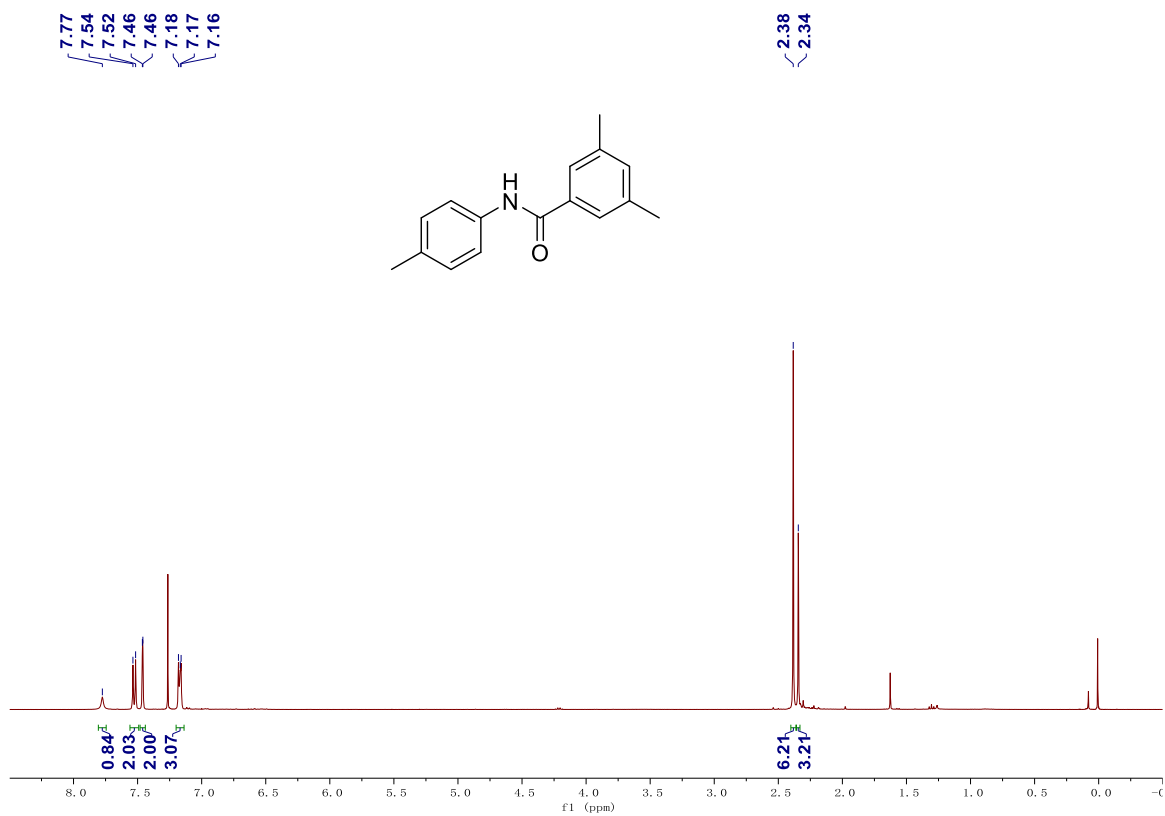

<sup>1</sup>H NMR spectrum for compound **3h** (CDCl<sub>3</sub>)

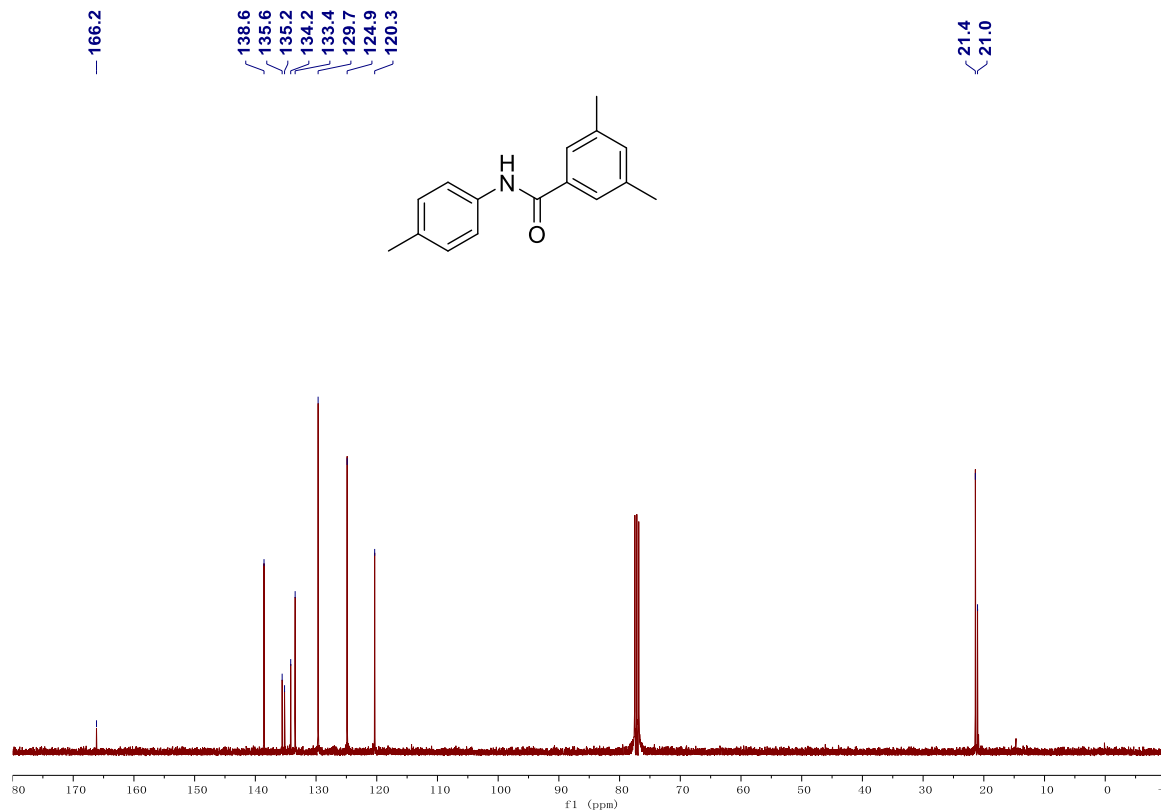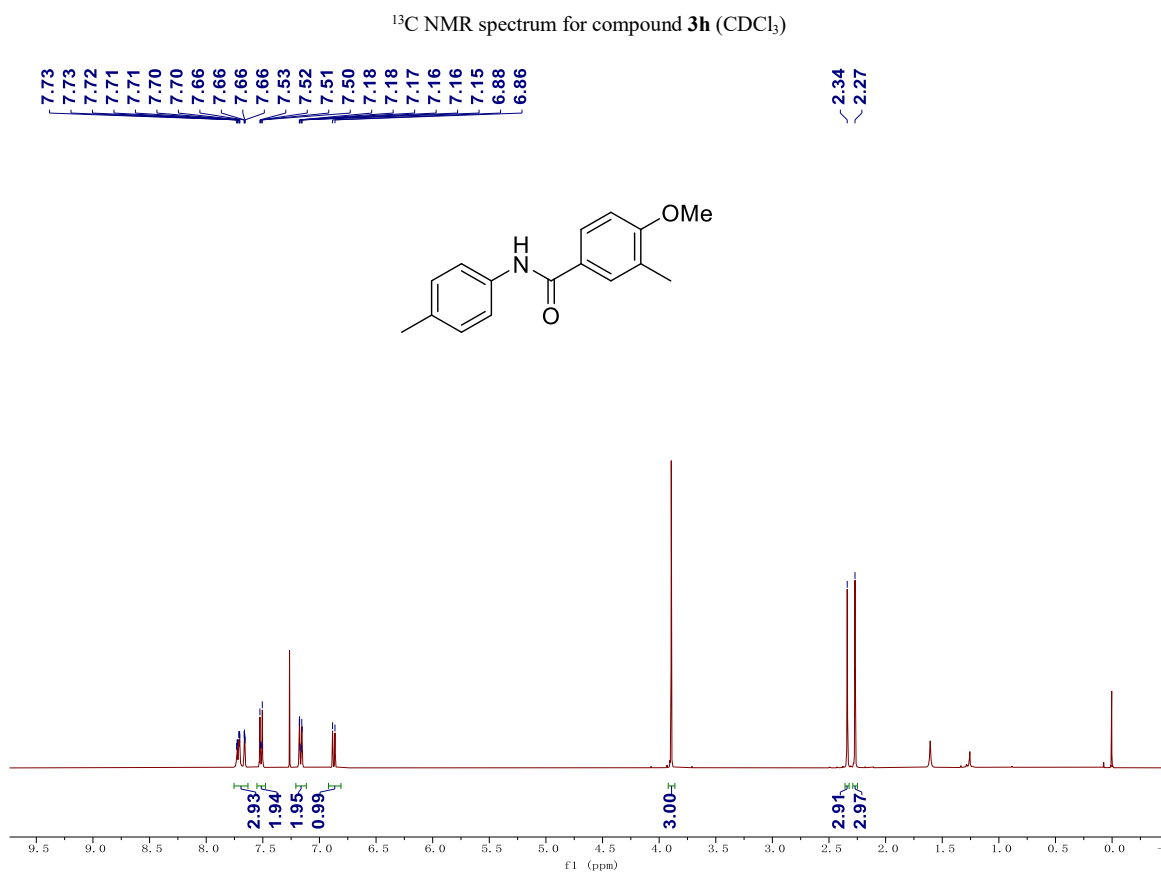

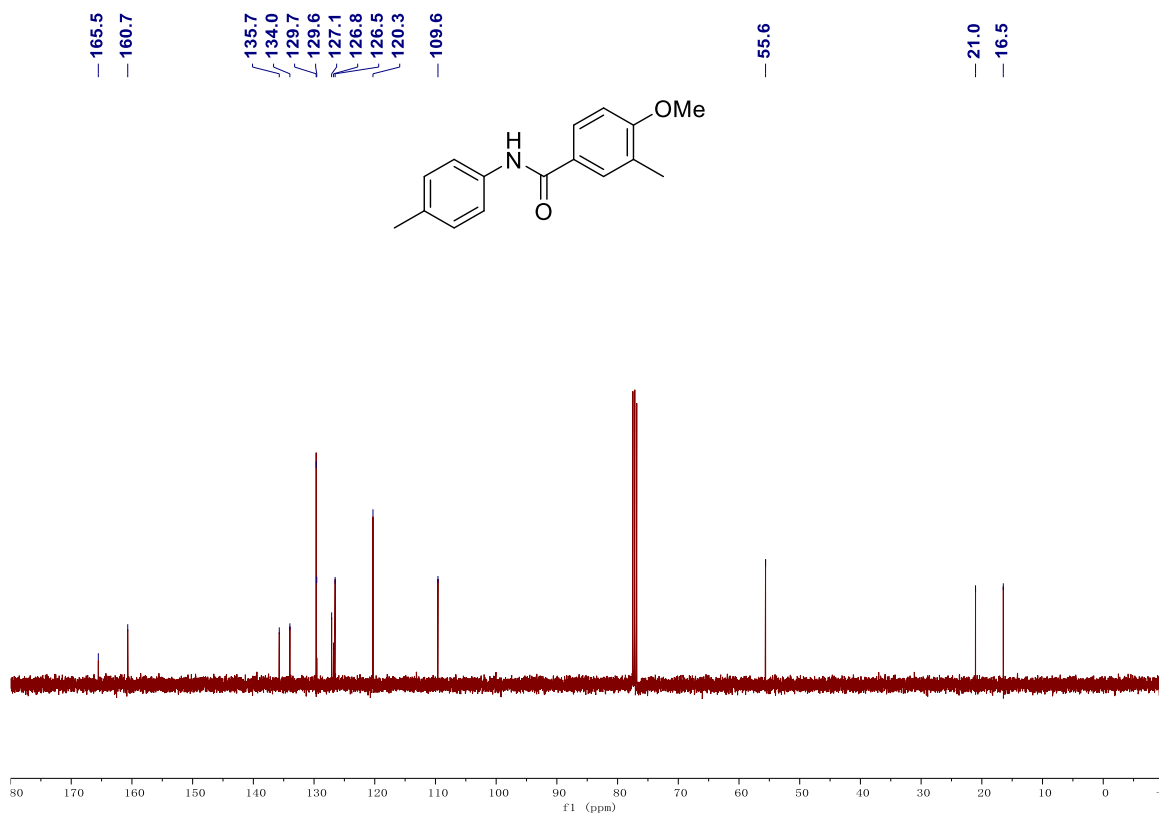

$^{13}\text{C}$  NMR spectrum for compound 3i ( $\text{CDCl}_3$ )

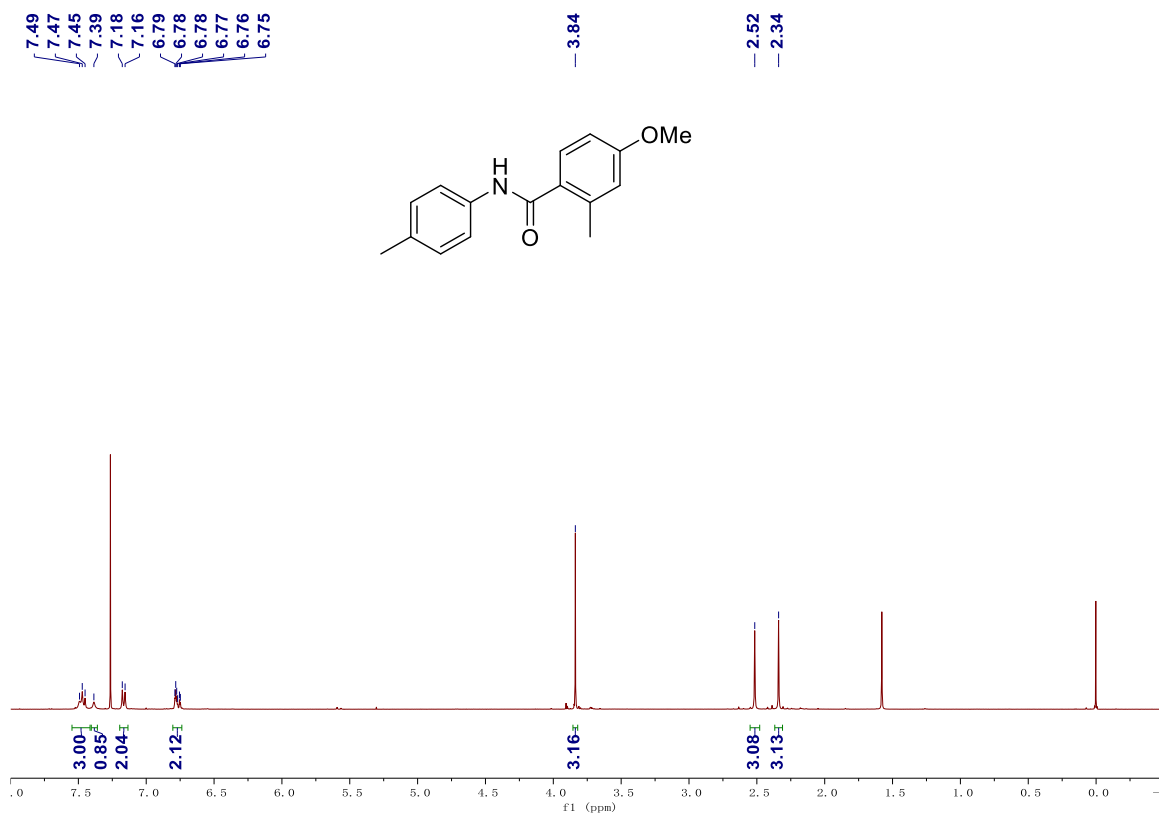

$^1\text{H}$  NMR spectrum for compound 3j ( $\text{CDCl}_3$ )



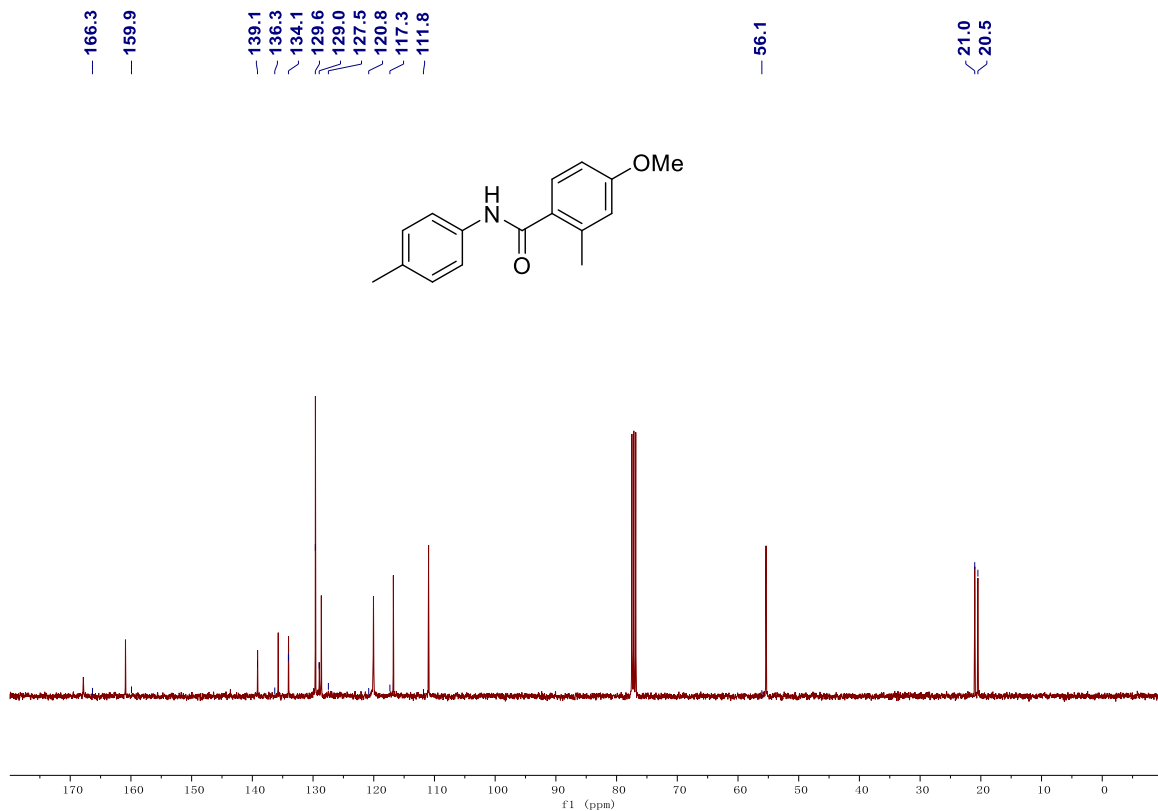

<sup>13</sup>C NMR spectrum for compound 3j (CDCl<sub>3</sub>)

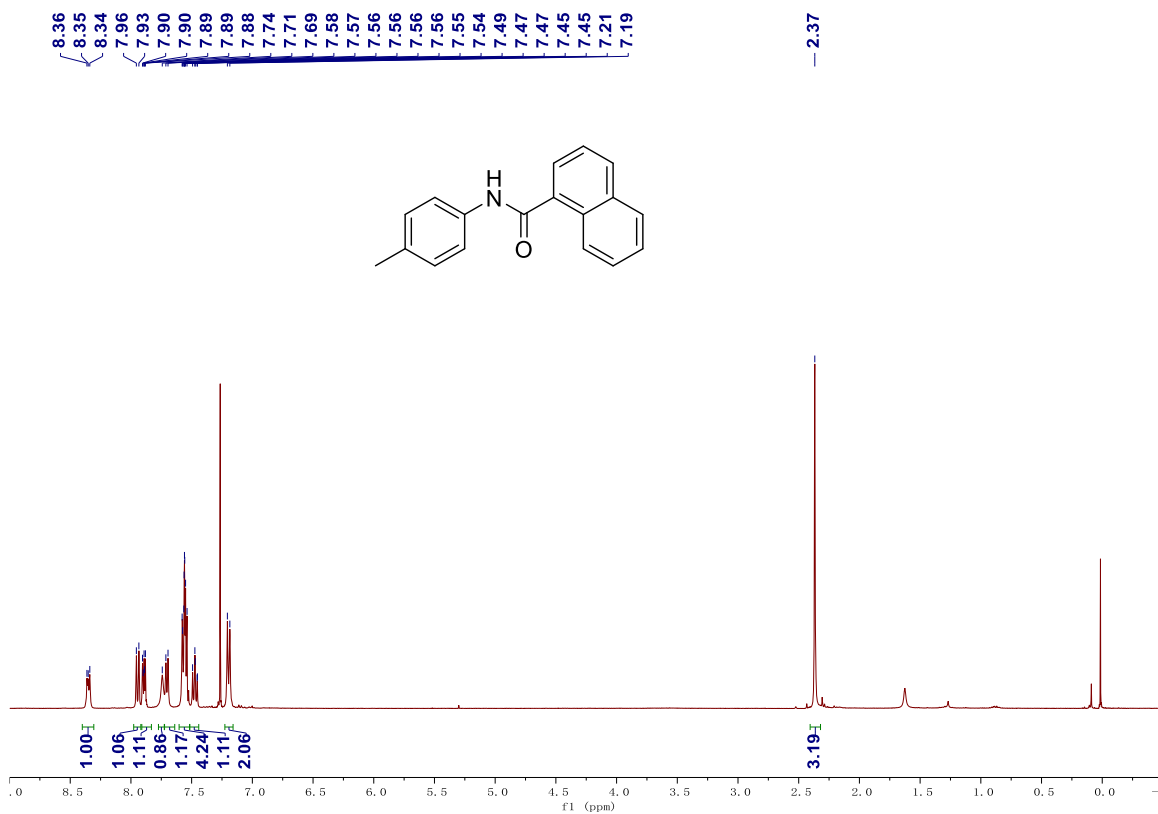

<sup>1</sup>H NMR spectrum for compound 3k (CDCl<sub>3</sub>)

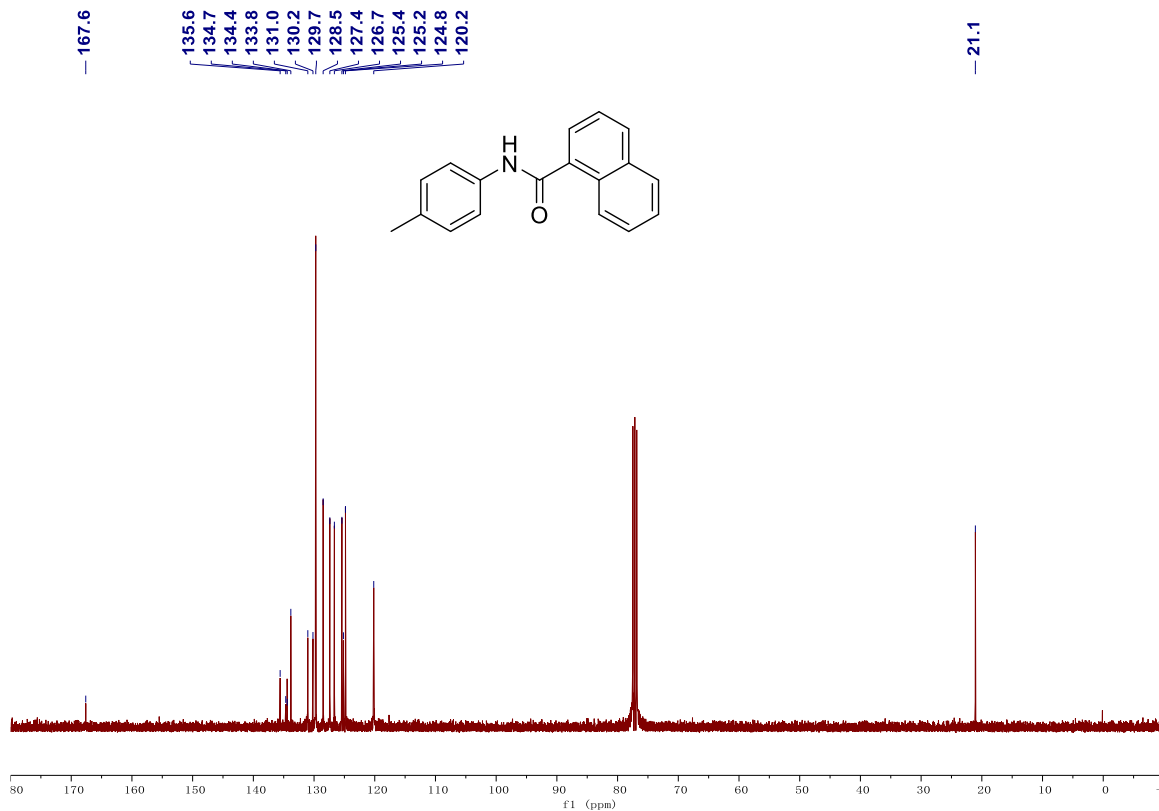

$^{13}\text{C}$  NMR spectrum for compound **3k** ( $\text{CDCl}_3$ )

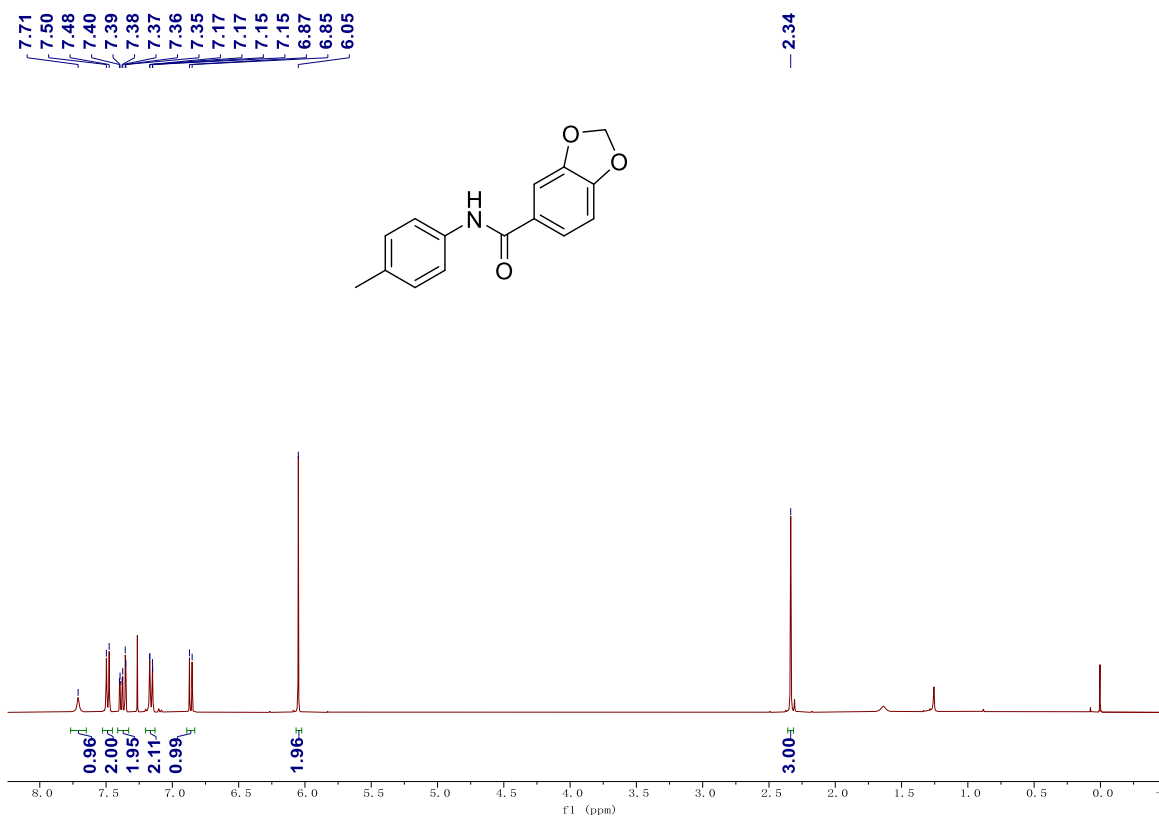

$^1\text{H}$  NMR spectrum for compound **31** ( $\text{CDCl}_3$ )

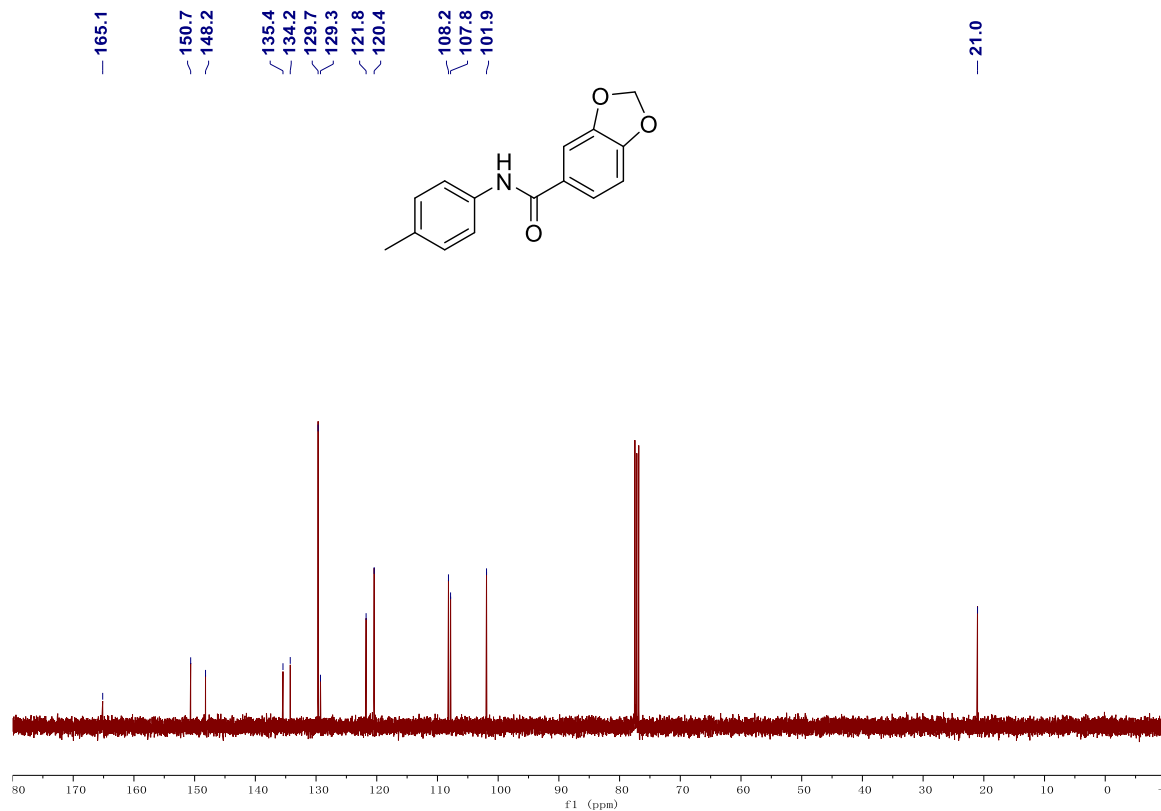

<sup>13</sup>C NMR spectrum for compound **3l** (CDCl<sub>3</sub>)

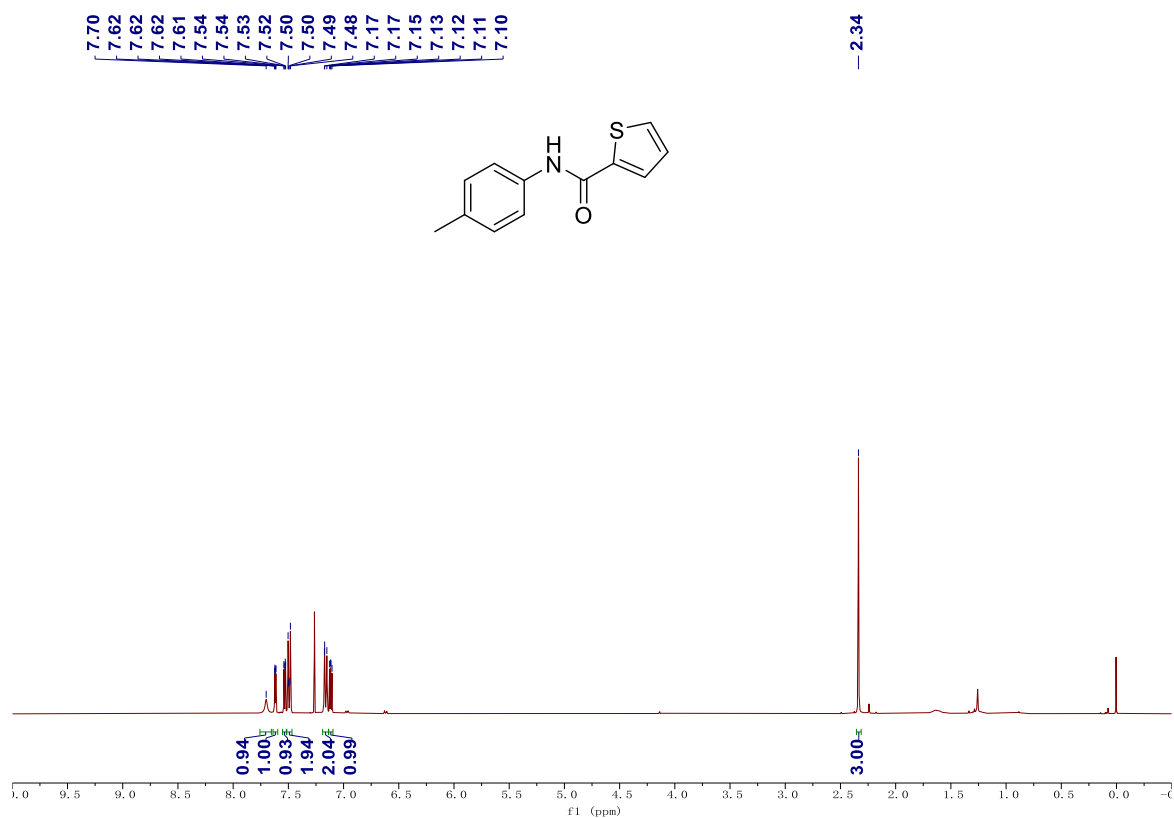

<sup>1</sup>H NMR spectrum for compound **3m** (CDCl<sub>3</sub>)

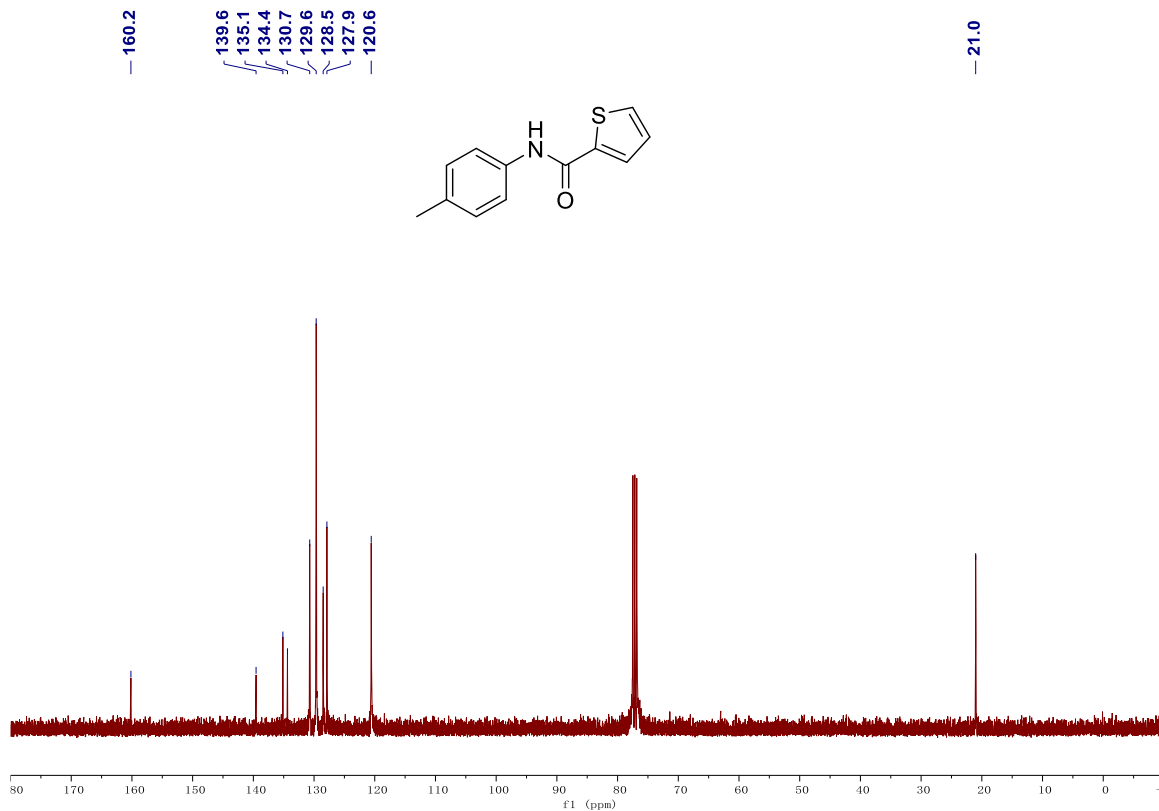

$^{13}\text{C}$  NMR spectrum for compound **3m** ( $\text{CDCl}_3$ )

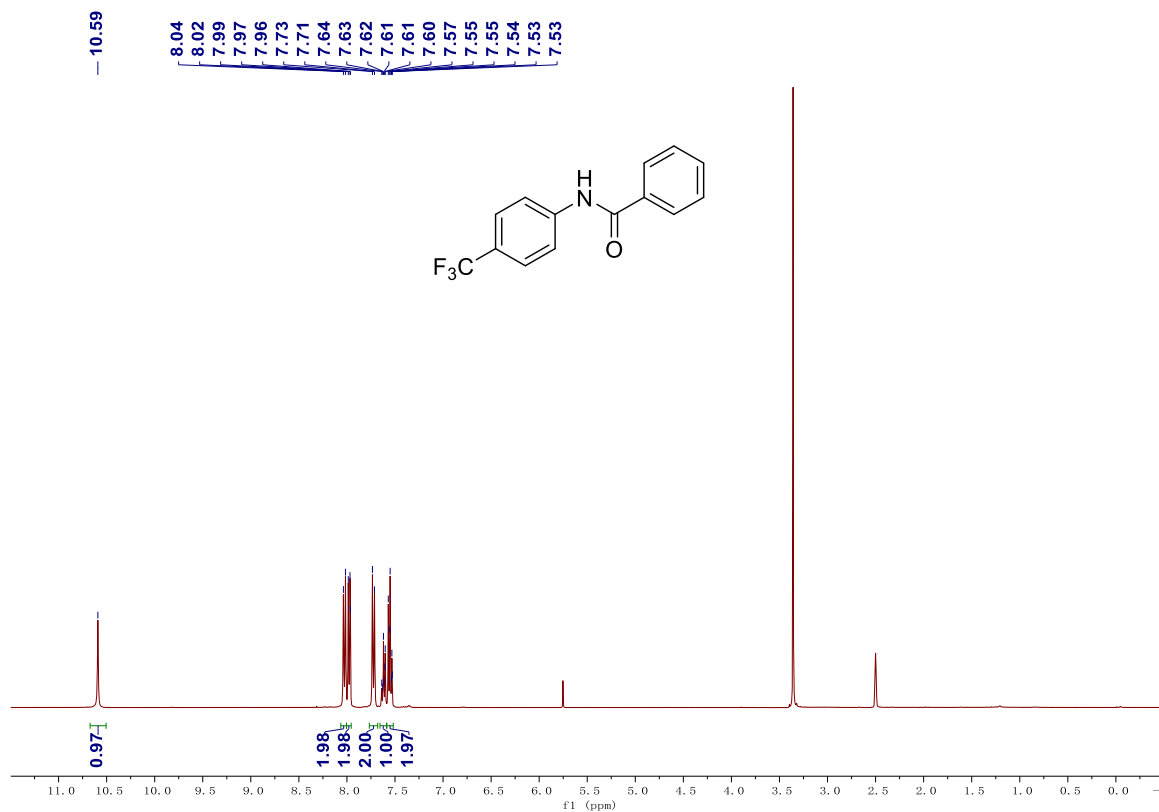

$^1\text{H}$  NMR spectrum for compound **3n** ( $\text{DMSO-}d_6$ )

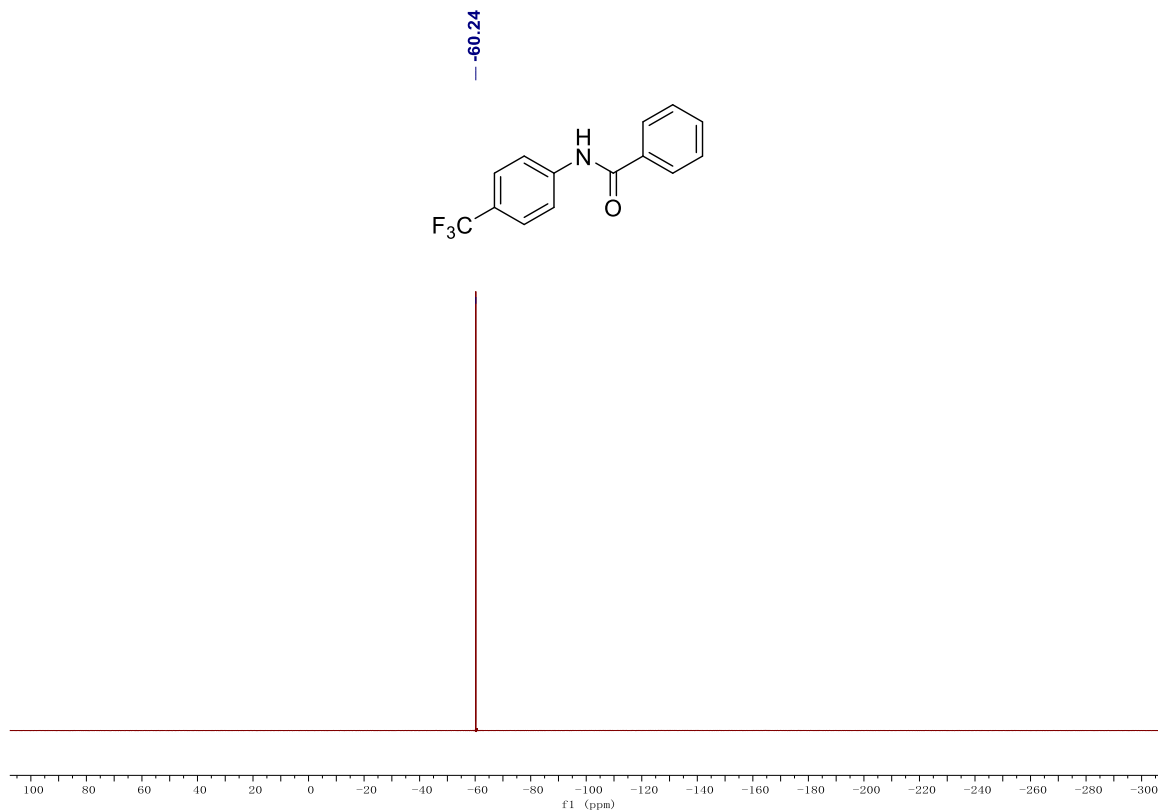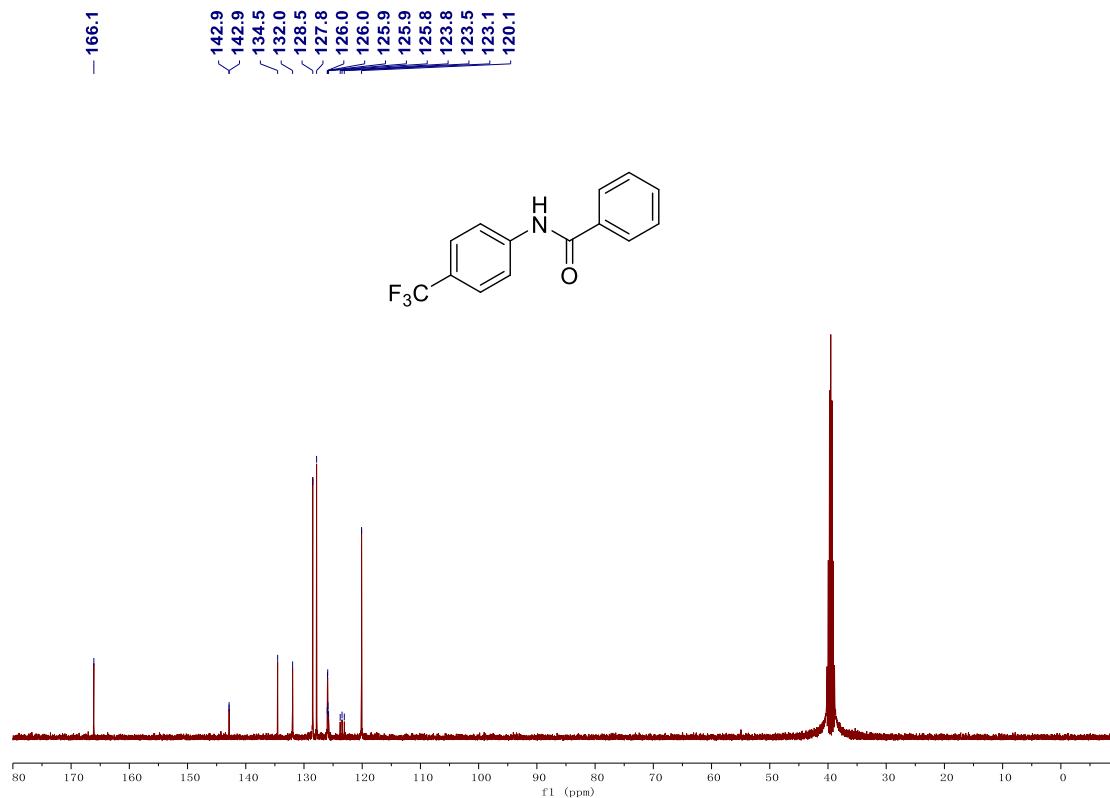

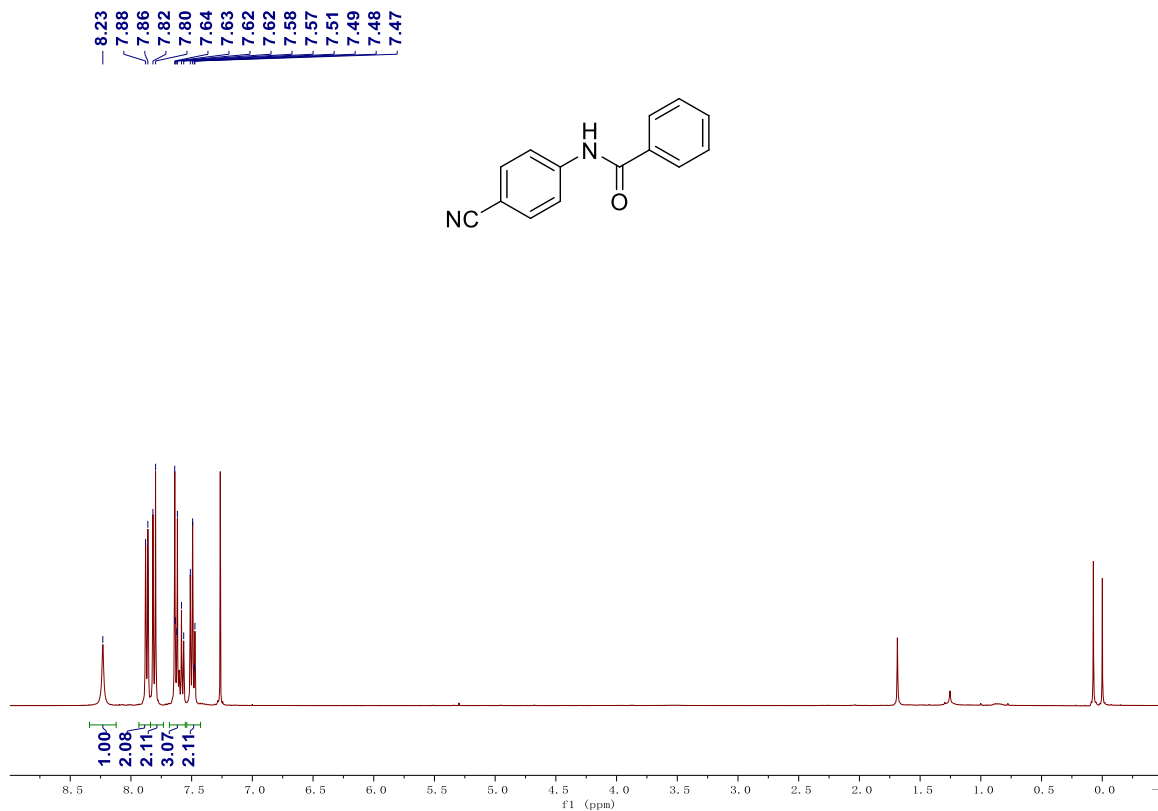

<sup>1</sup>H NMR spectrum for compound **3o** (CDCl<sub>3</sub>)

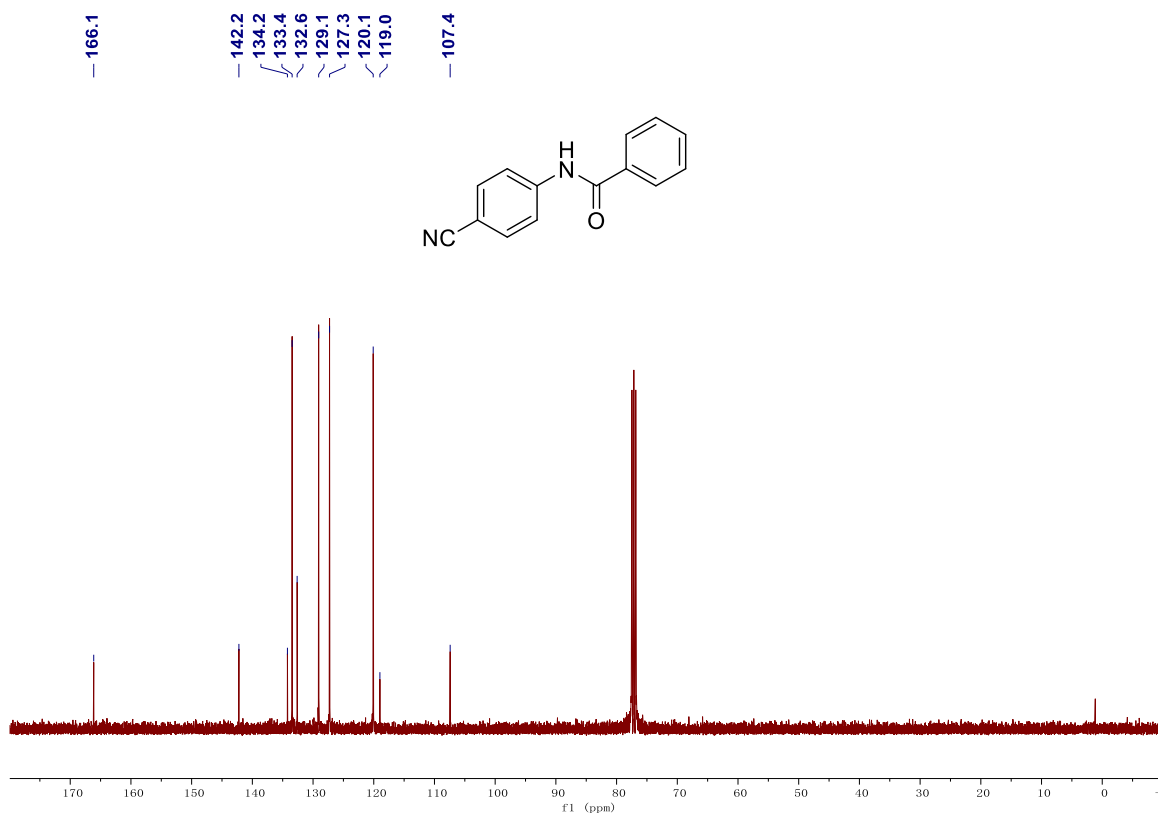

<sup>13</sup>C NMR spectrum for compound **3o** (CDCl<sub>3</sub>)

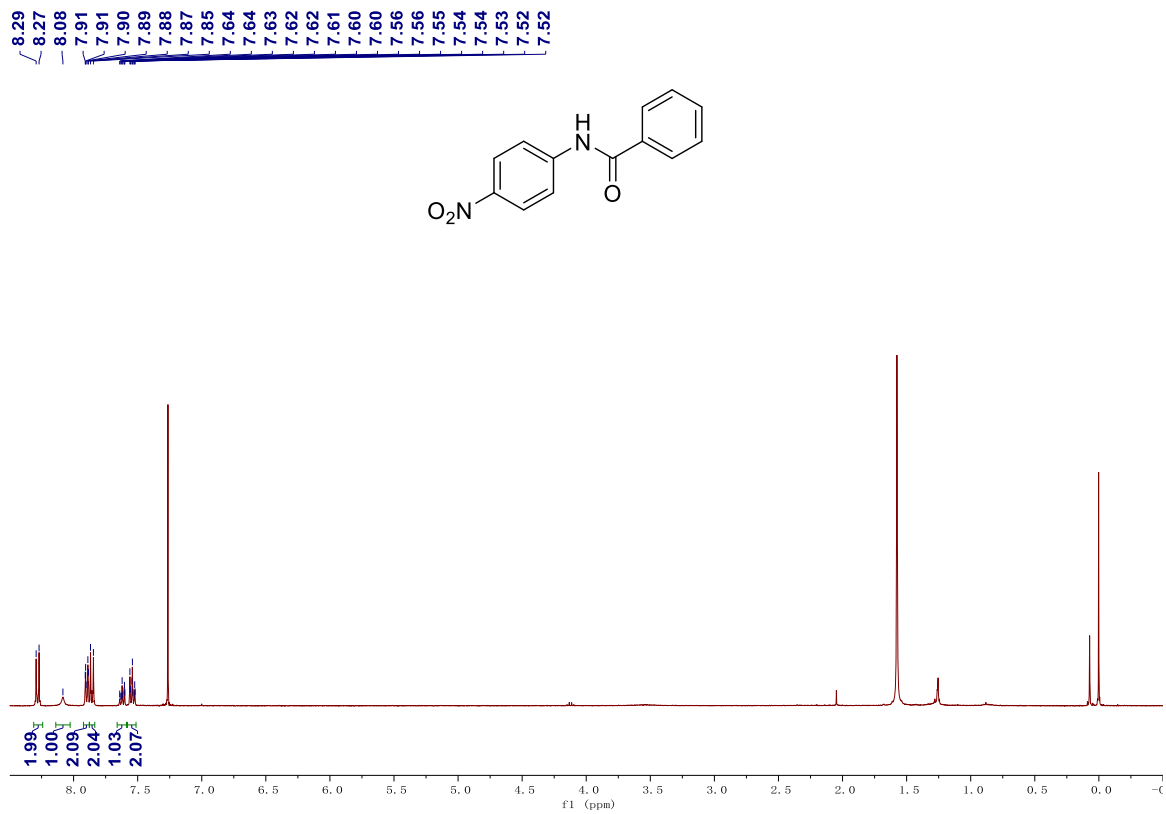

<sup>1</sup>H NMR spectrum for compound **3p** (CDCl<sub>3</sub>)

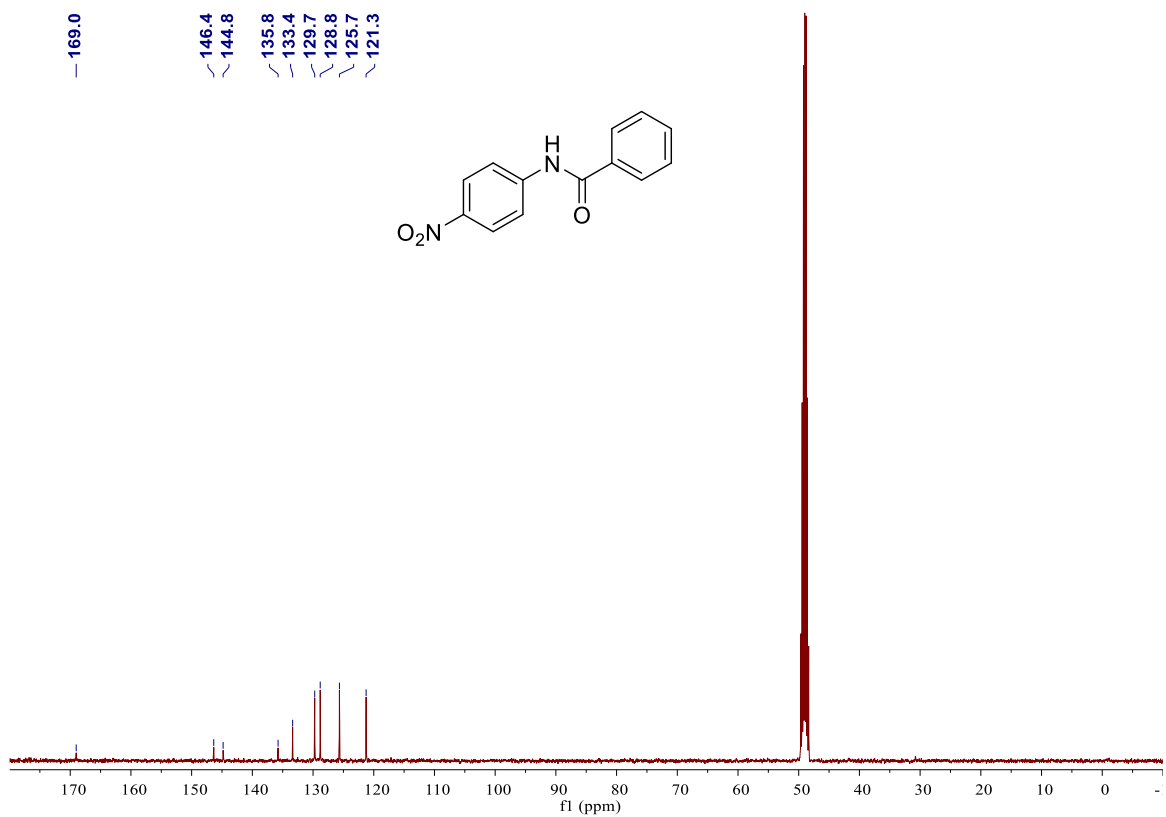

<sup>13</sup>C NMR spectrum for compound **3p** (CD<sub>3</sub>OD)

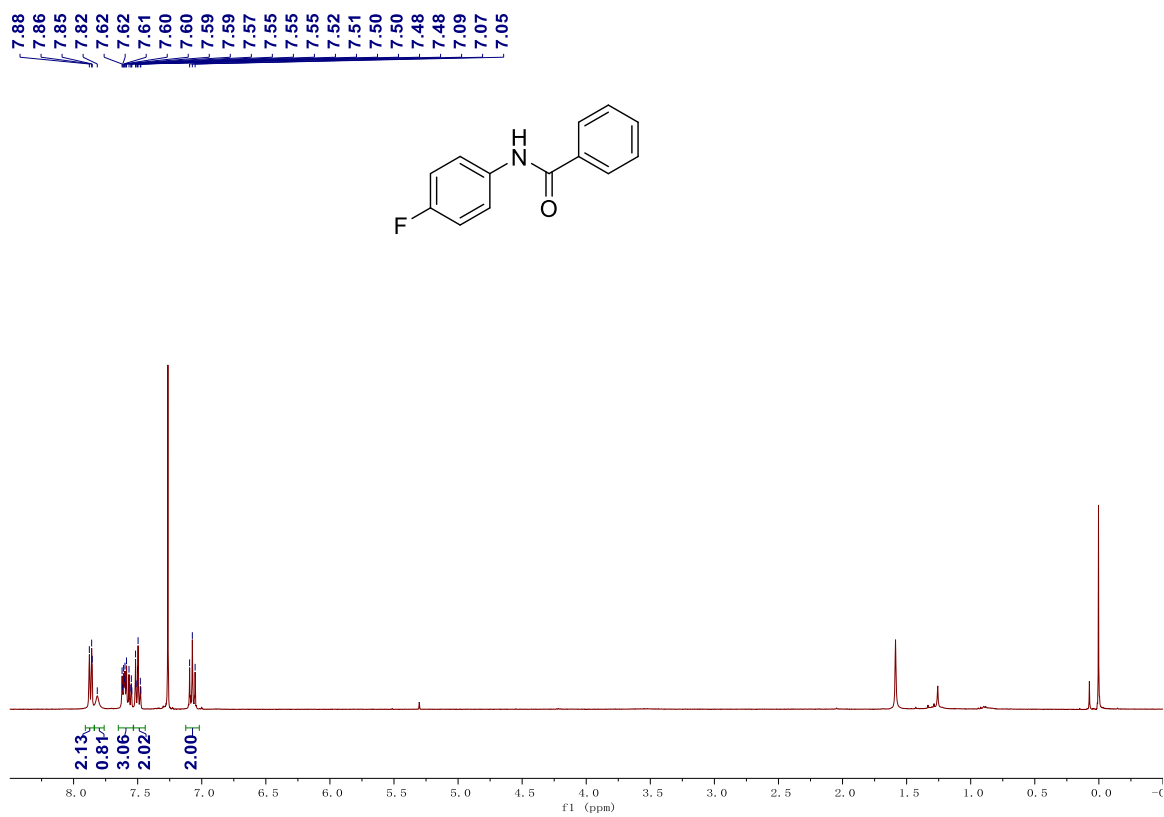

<sup>1</sup>H NMR spectrum for compound **3q** (CDCl<sub>3</sub>)

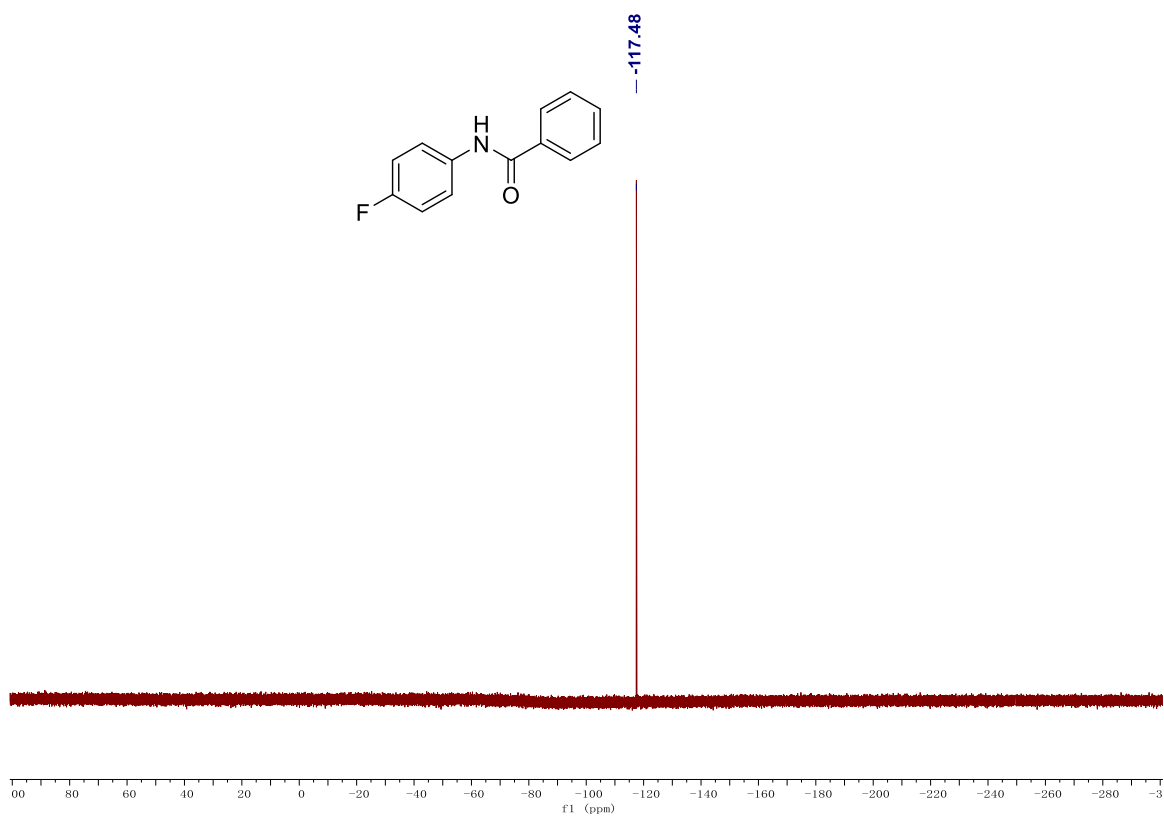

<sup>19</sup>F NMR spectrum for compound **3q** (CDCl<sub>3</sub>)



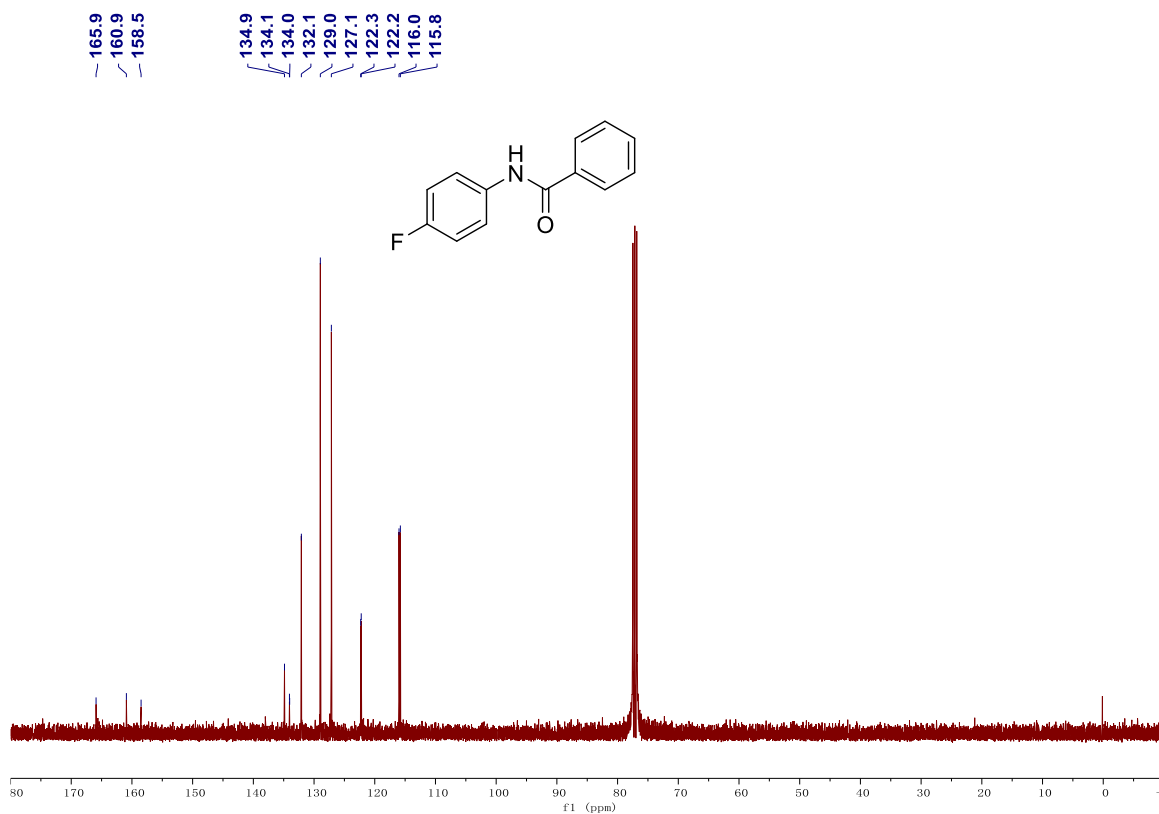

<sup>13</sup>C NMR spectrum for compound 3q (CDCl<sub>3</sub>)

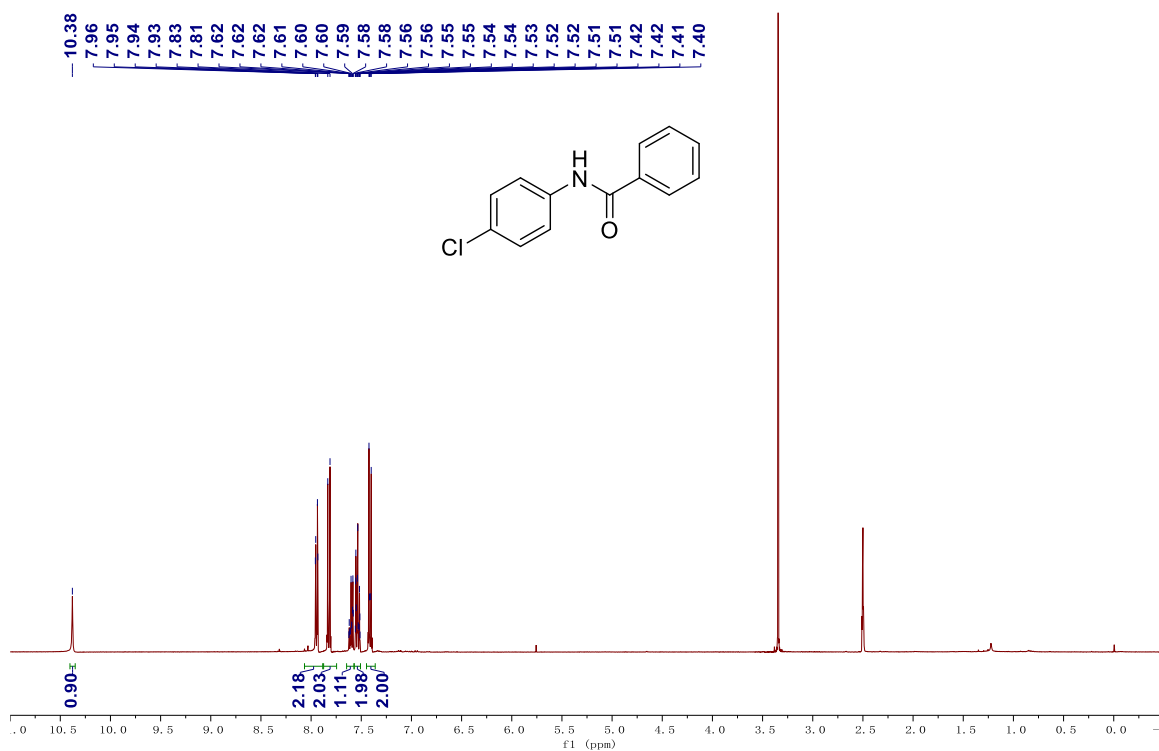

<sup>1</sup>H NMR spectrum for compound 3r (DMSO-*d*<sub>6</sub>)

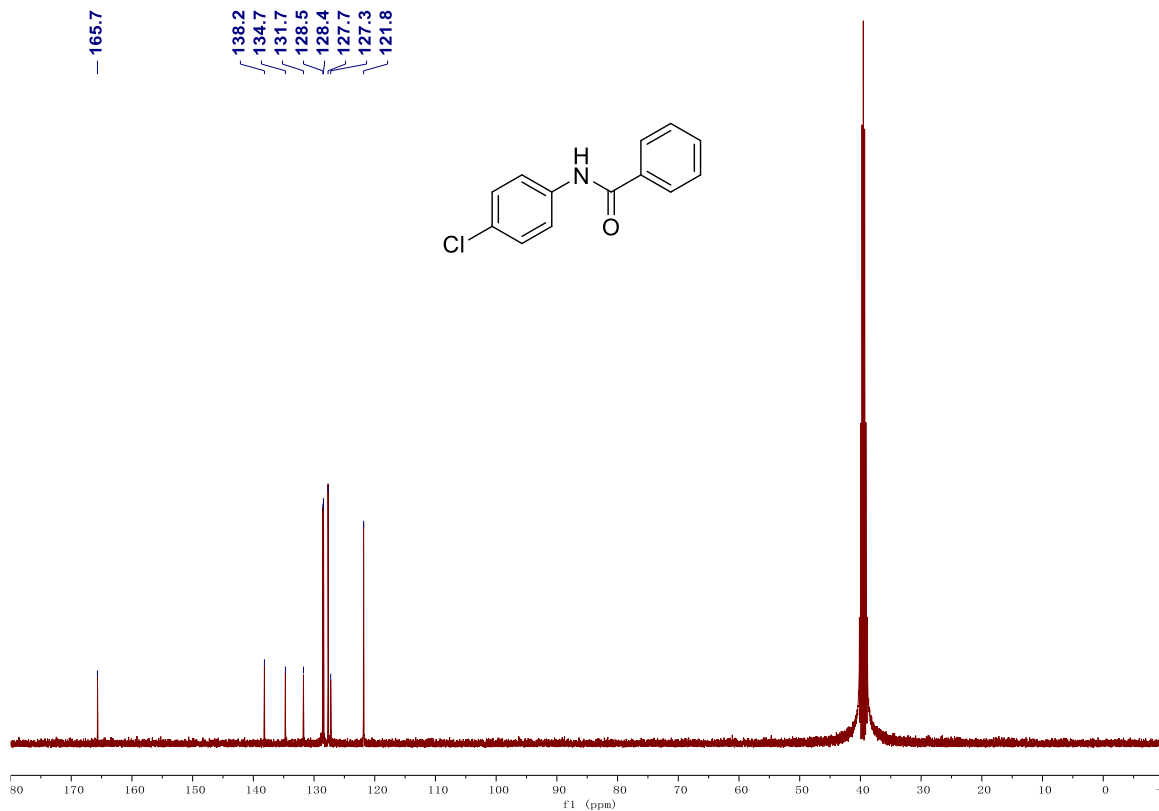

<sup>13</sup>C NMR spectrum for compound 3r (DMSO-*d*<sub>6</sub>)

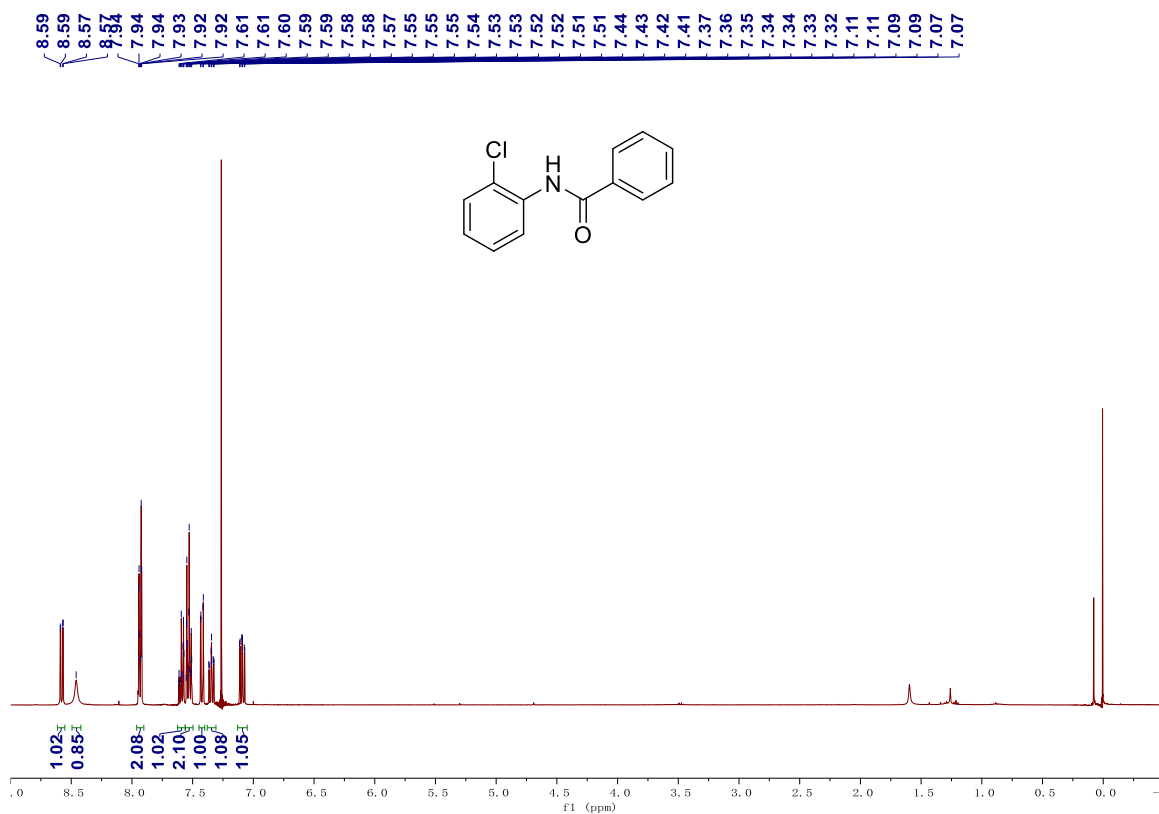

<sup>1</sup>H NMR spectrum for compound 3s (CDCl<sub>3</sub>)

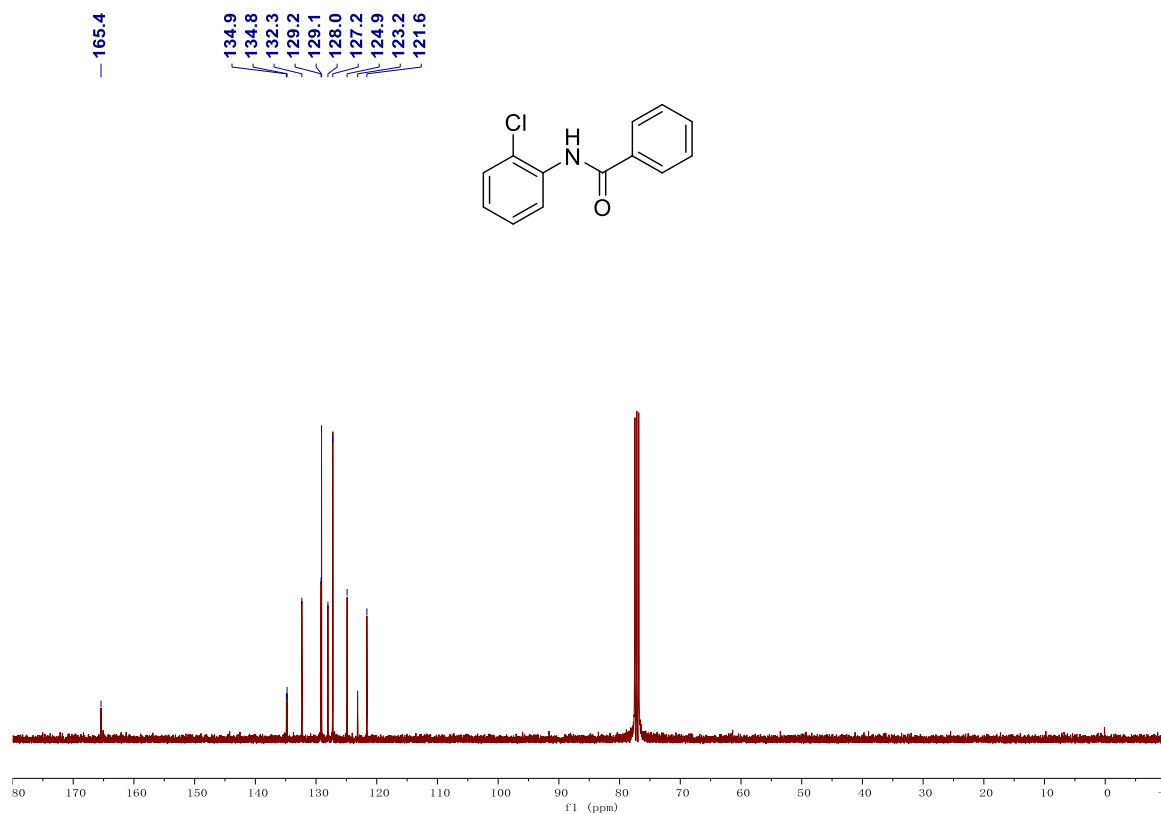

$^{13}\text{C}$  NMR spectrum for compound **3s** ( $\text{CDCl}_3$ )

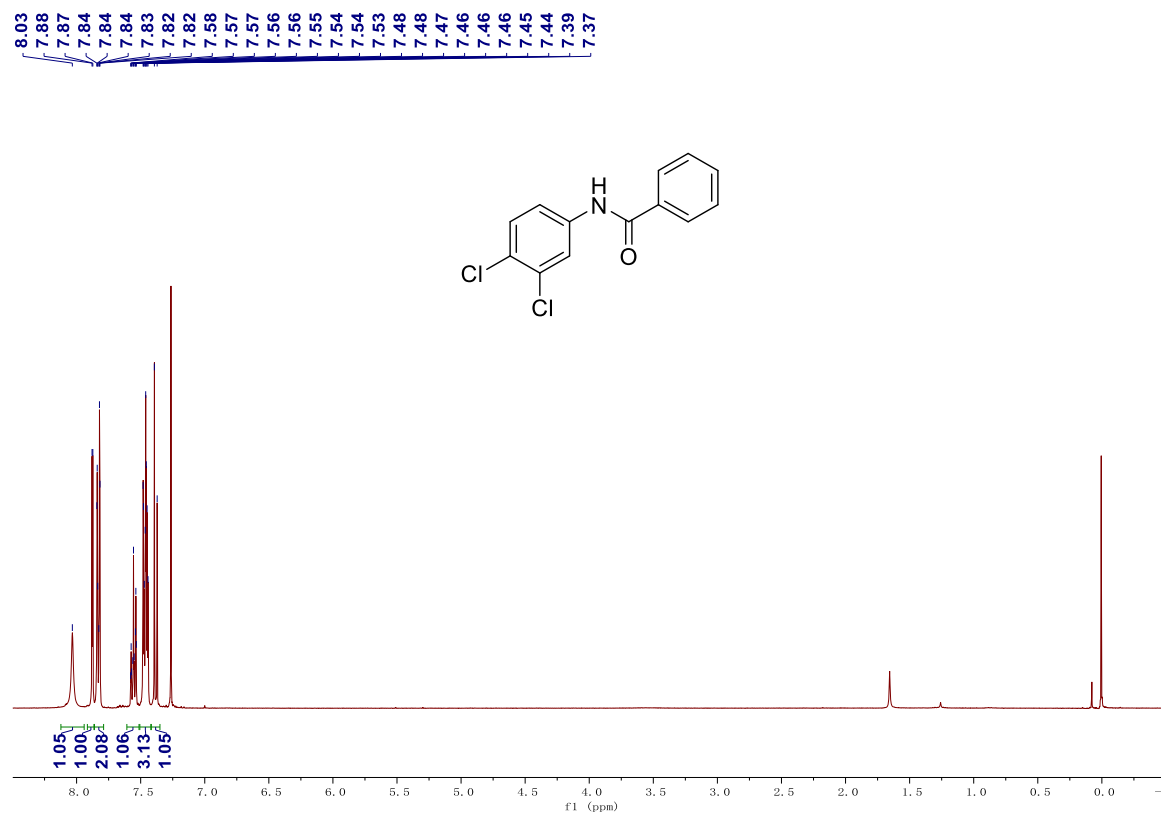

$^1\text{H}$  NMR spectrum for compound **3t** ( $\text{CDCl}_3$ )

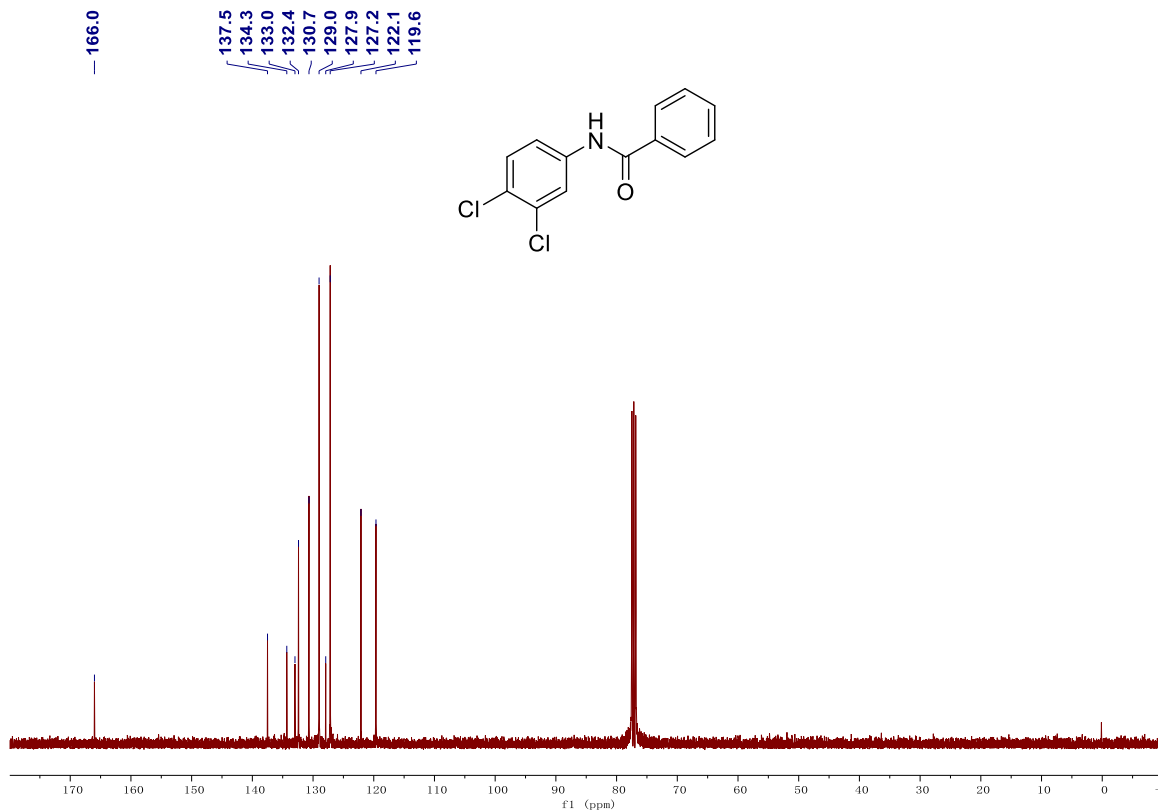

<sup>13</sup>C NMR spectrum for compound **3t** (CDCl<sub>3</sub>)

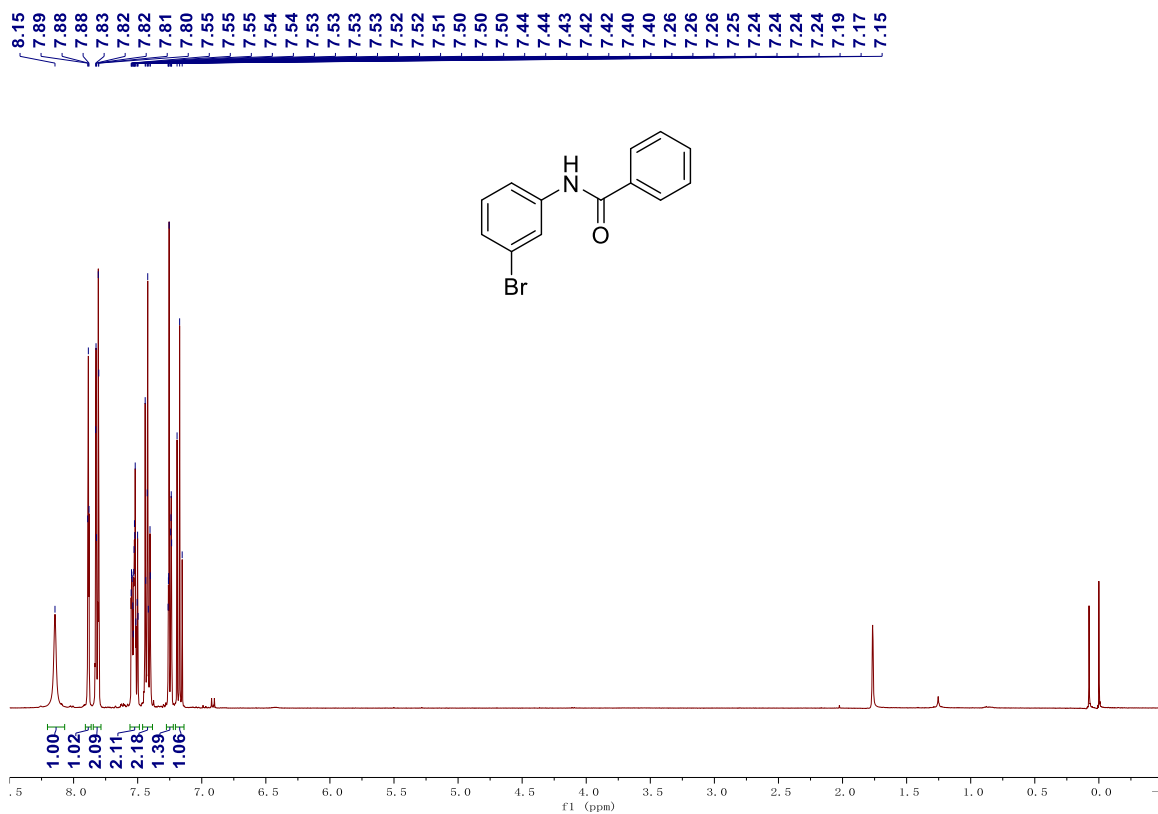

<sup>1</sup>H NMR spectrum for compound **3u** (CDCl<sub>3</sub>)

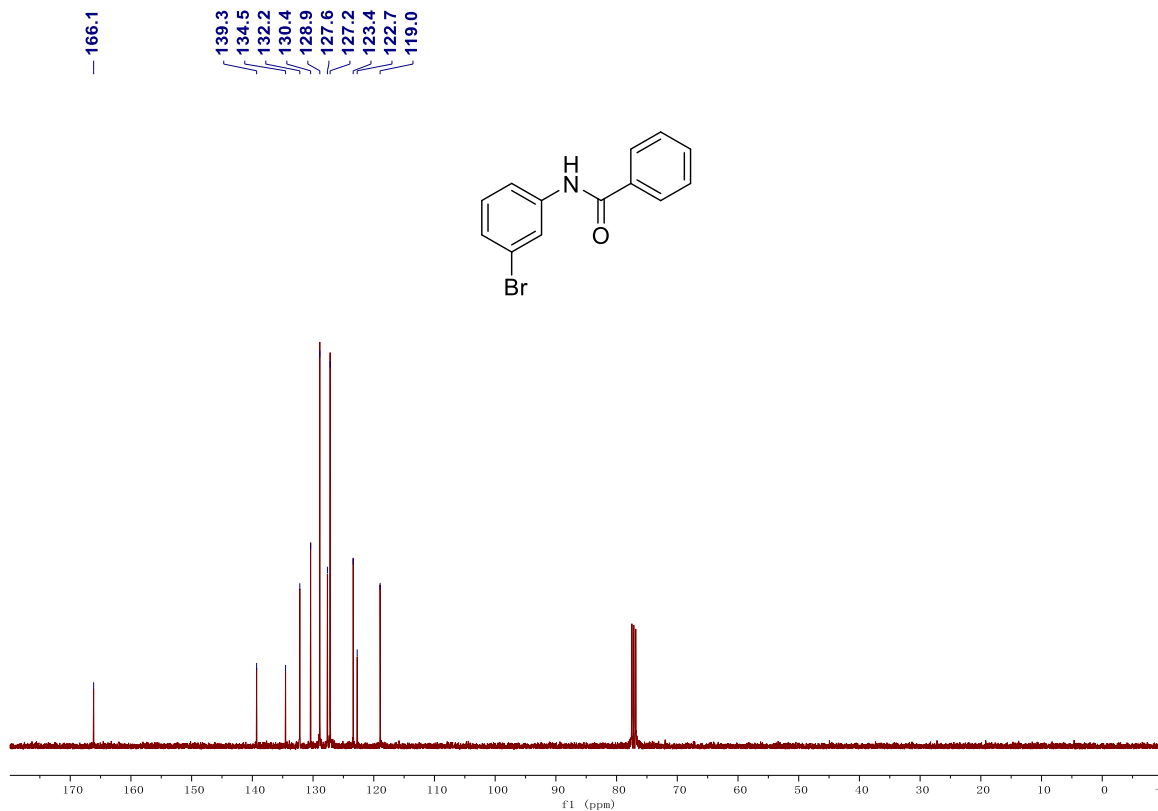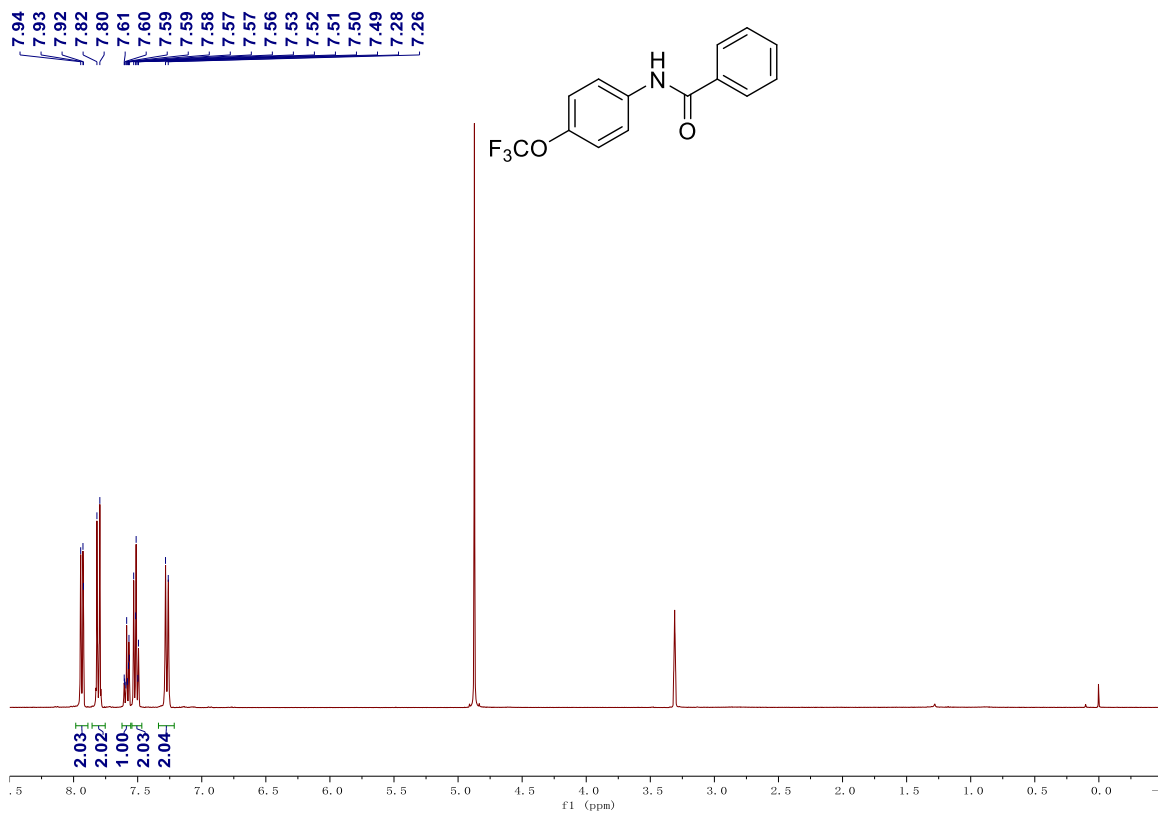

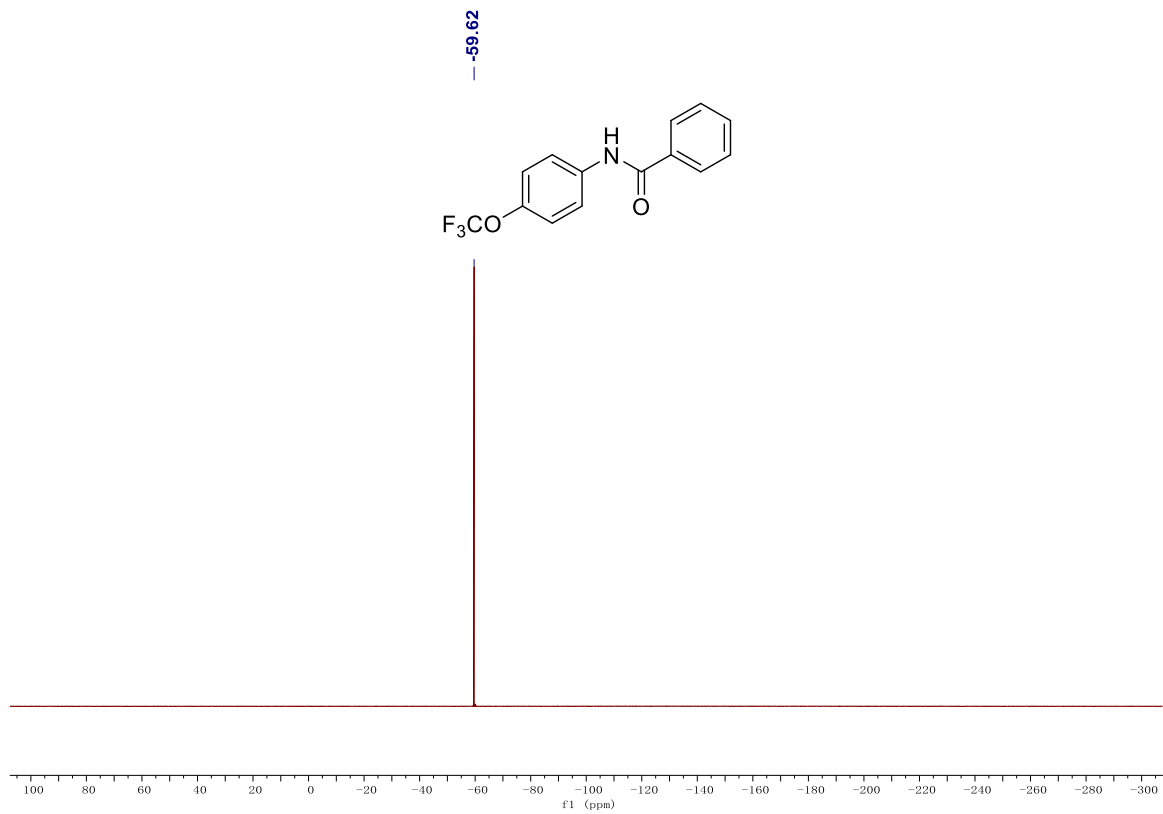

$^{19}\text{F}$  NMR spectrum for compound **3v** ( $\text{CD}_3\text{OD}$ )

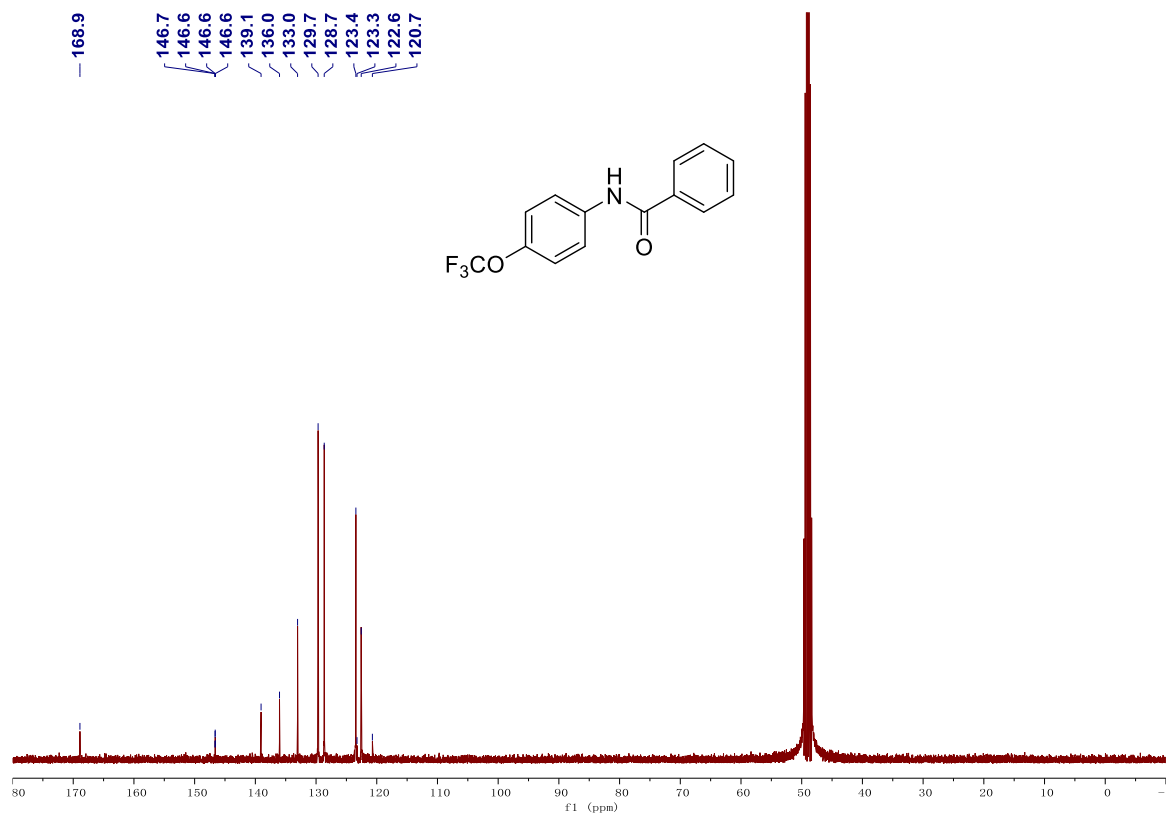

$^{13}\text{C}$  NMR spectrum for compound **3v** ( $\text{CD}_3\text{OD}$ )

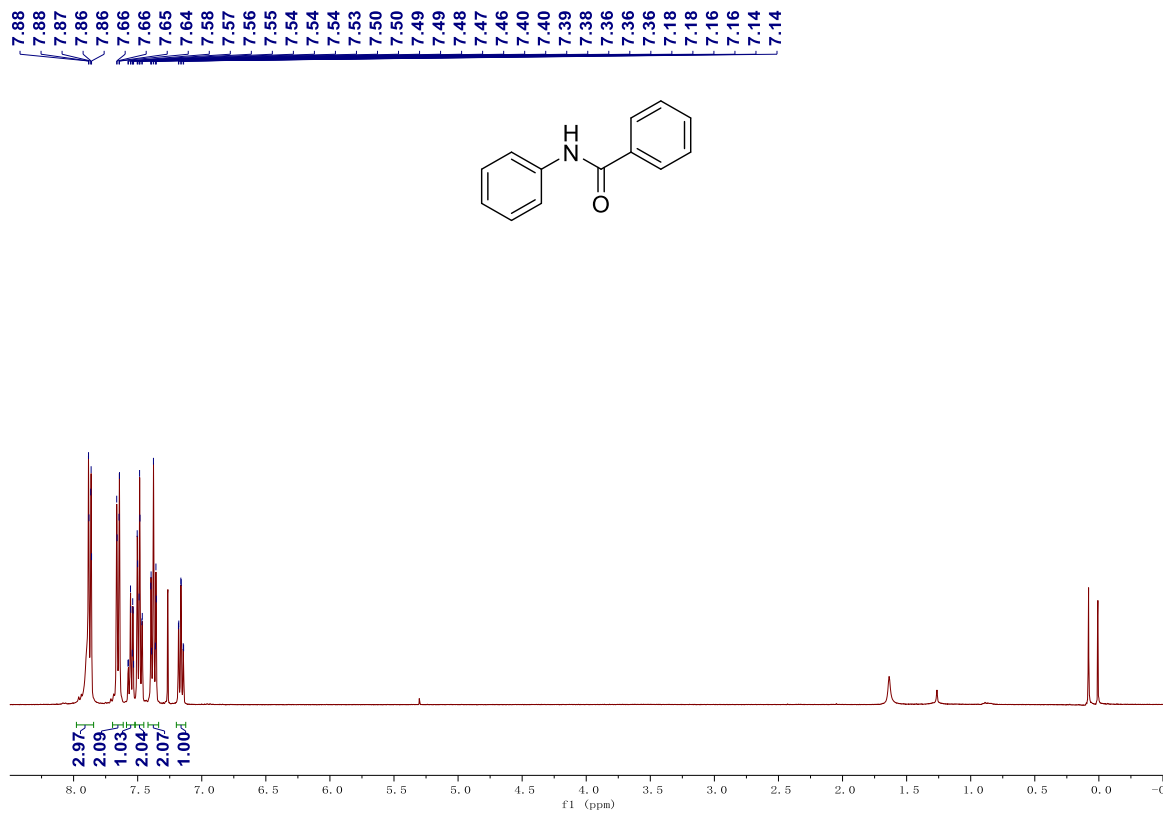

<sup>1</sup>H NMR spectrum for compound **3w** (CDCl<sub>3</sub>)

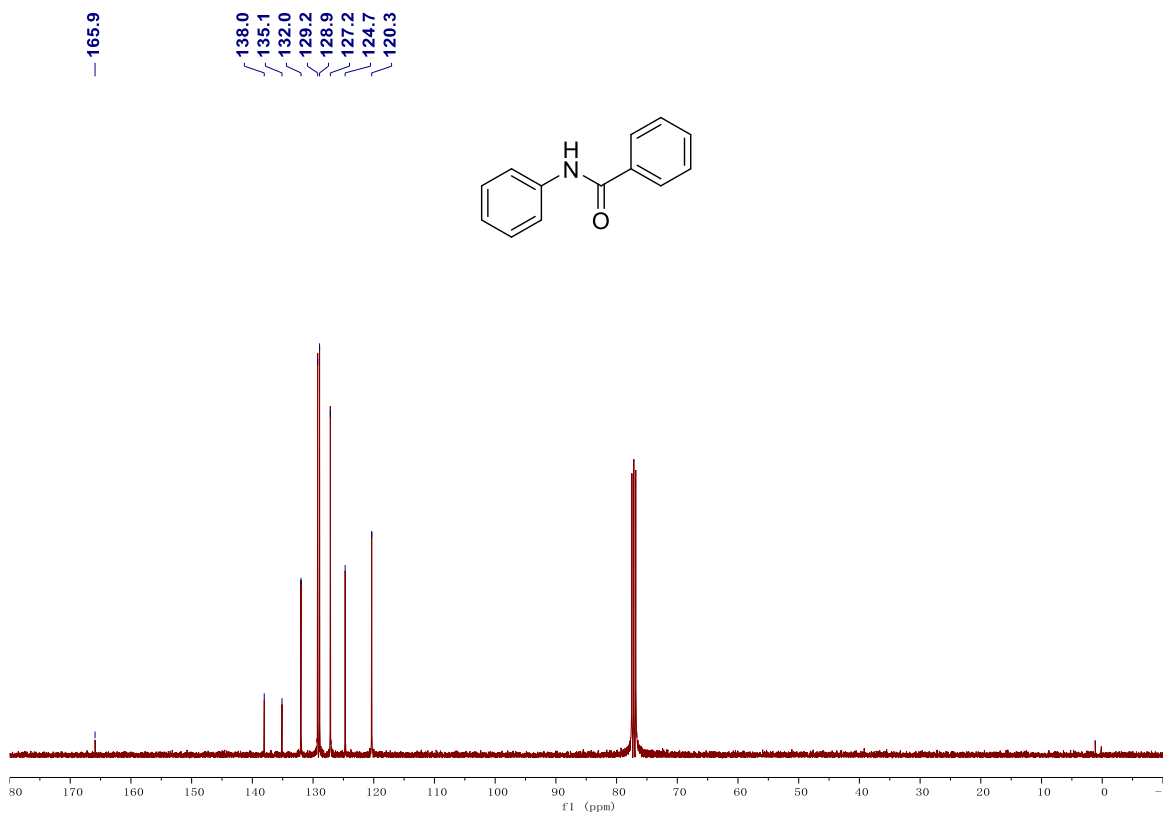

<sup>13</sup>C NMR spectrum for compound **3w** (CDCl<sub>3</sub>)

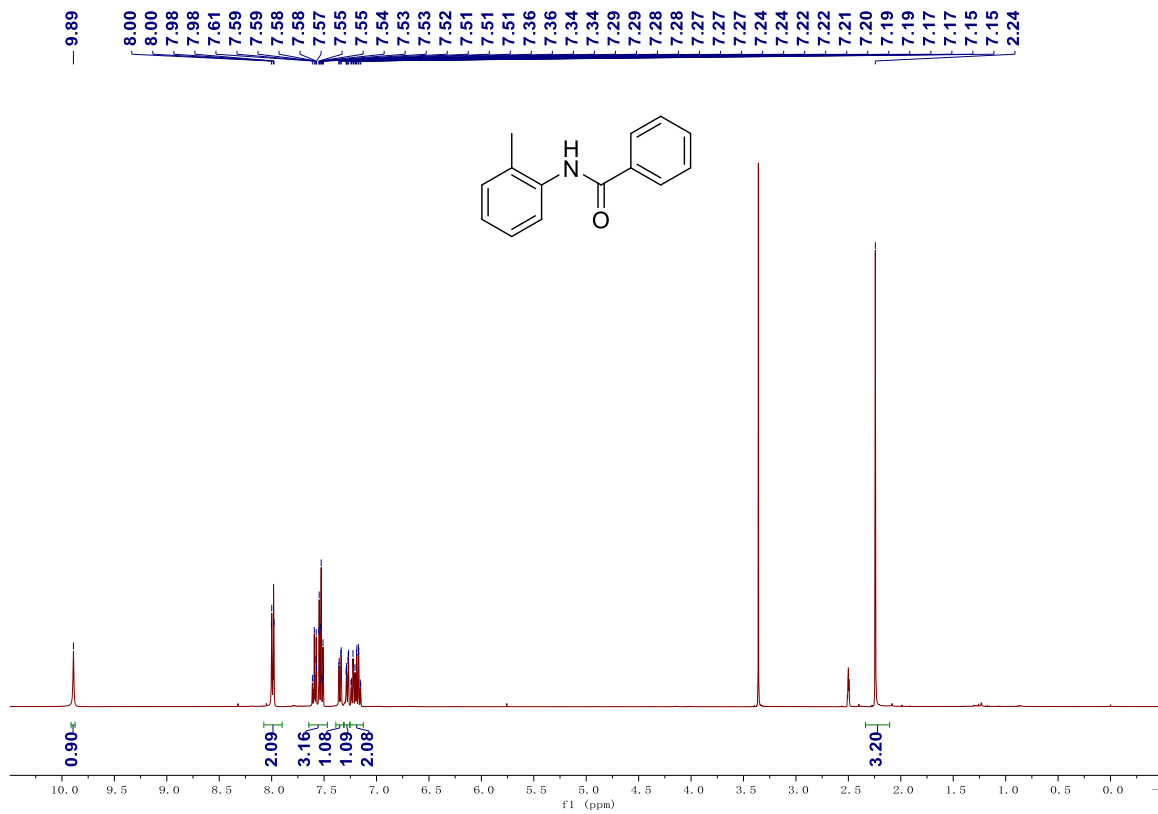

<sup>1</sup>H NMR spectrum for compound 3x (DMSO-*d*<sub>6</sub>)

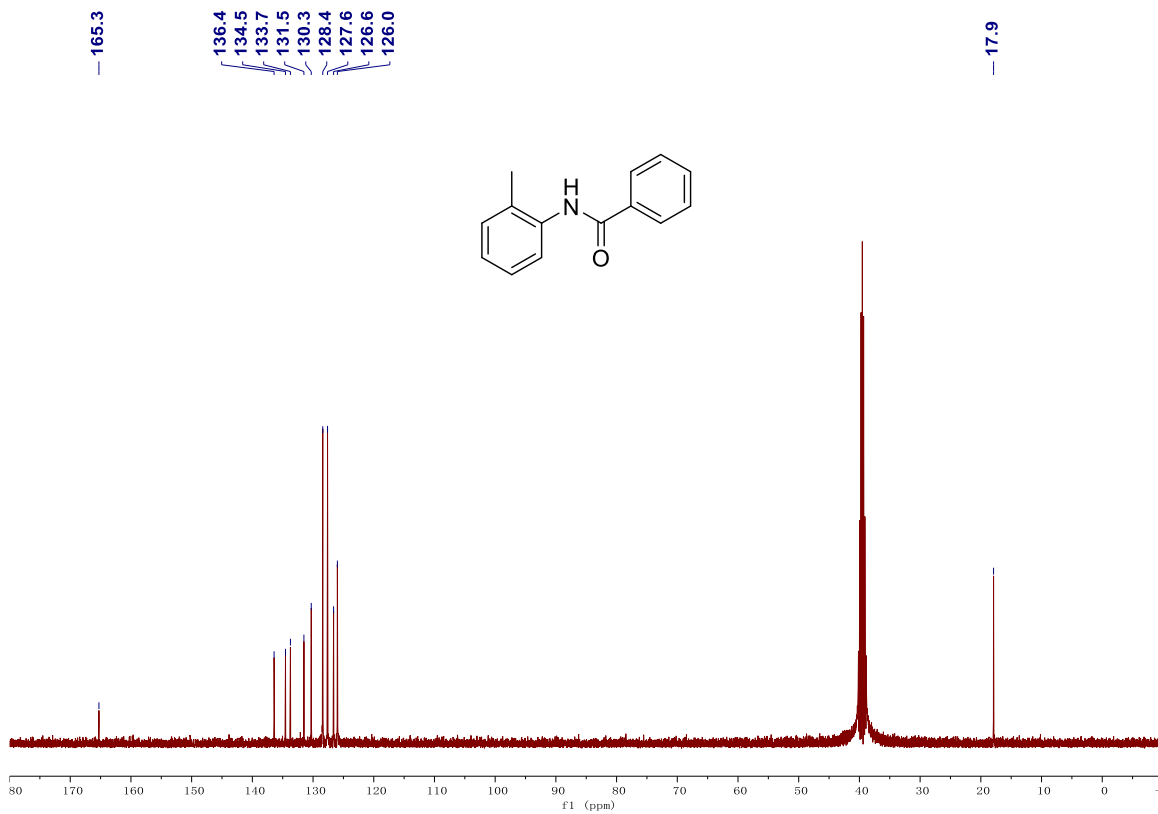

<sup>13</sup>C NMR spectrum for compound 3x (DMSO-*d*<sub>6</sub>)



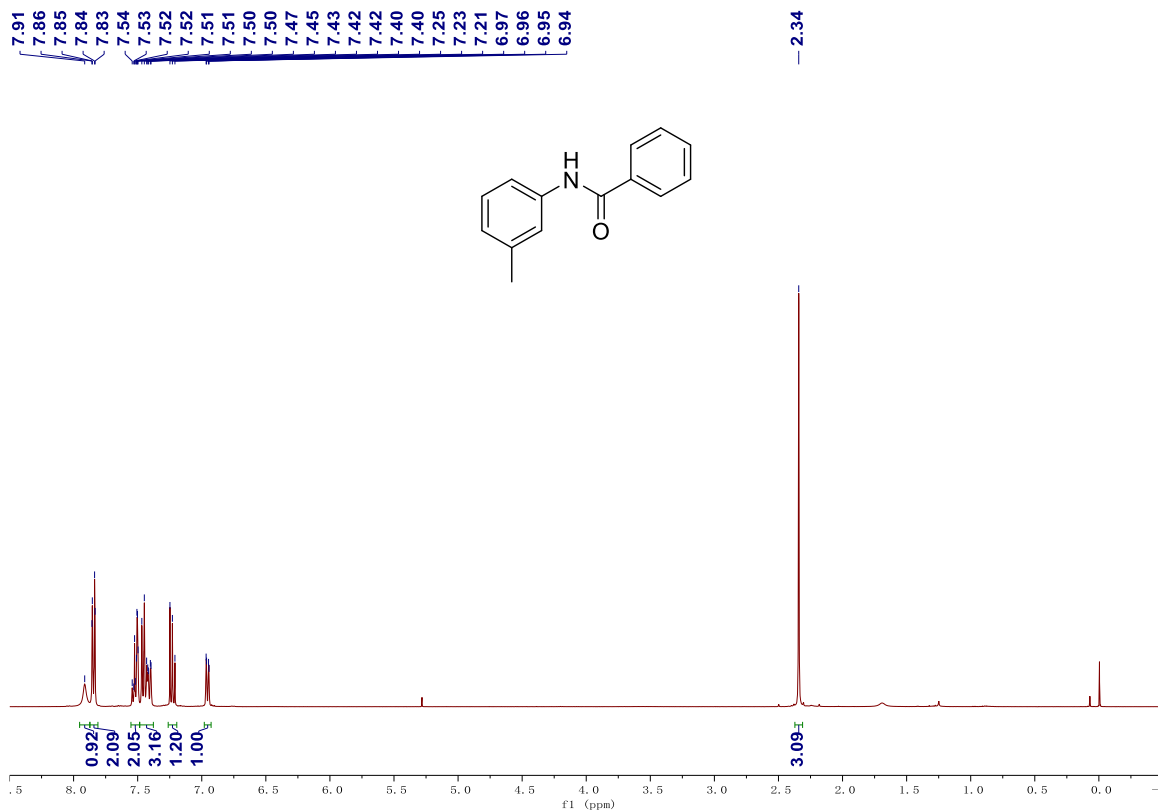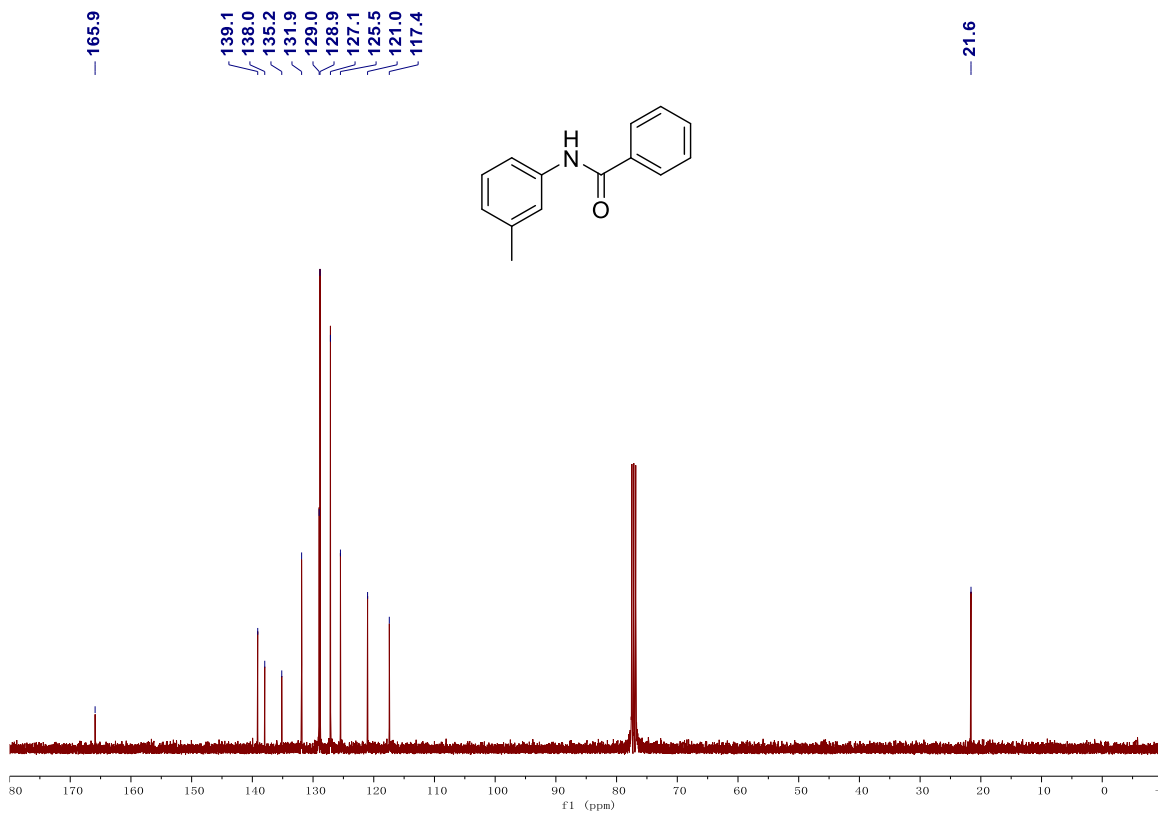

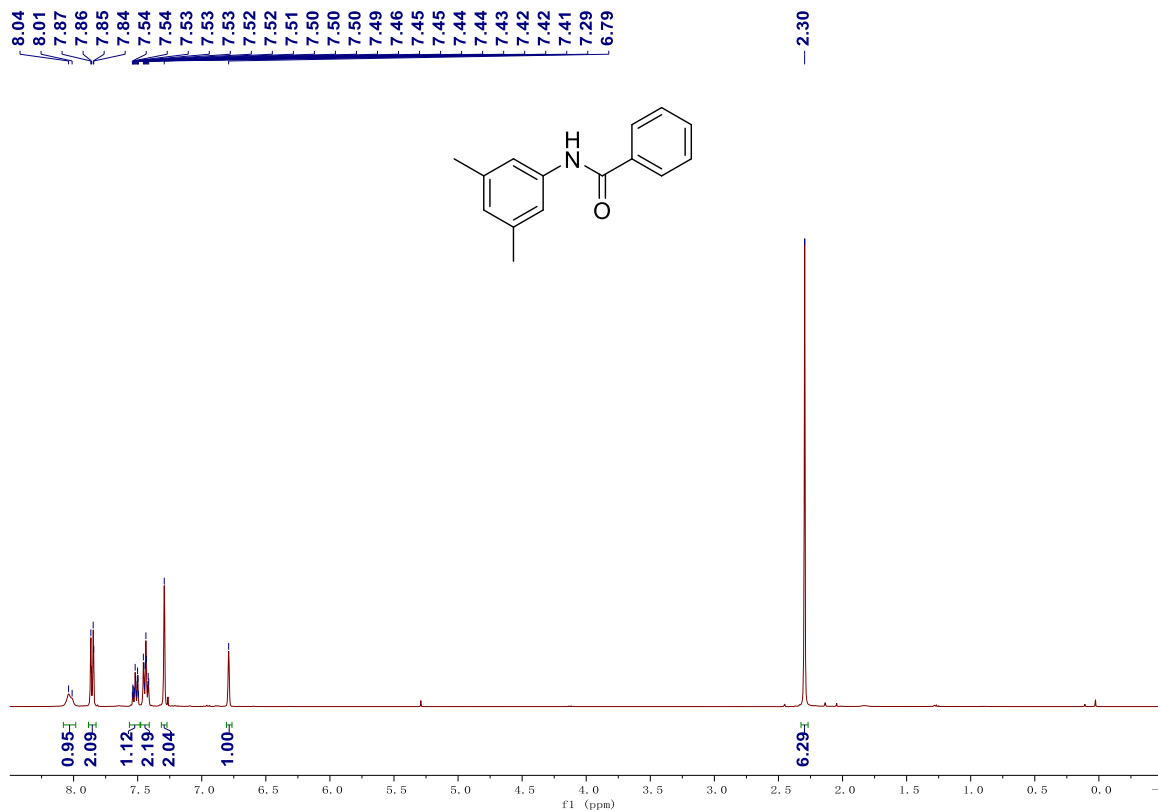

<sup>1</sup>H NMR spectrum for compound **3z** (CDCl<sub>3</sub>)

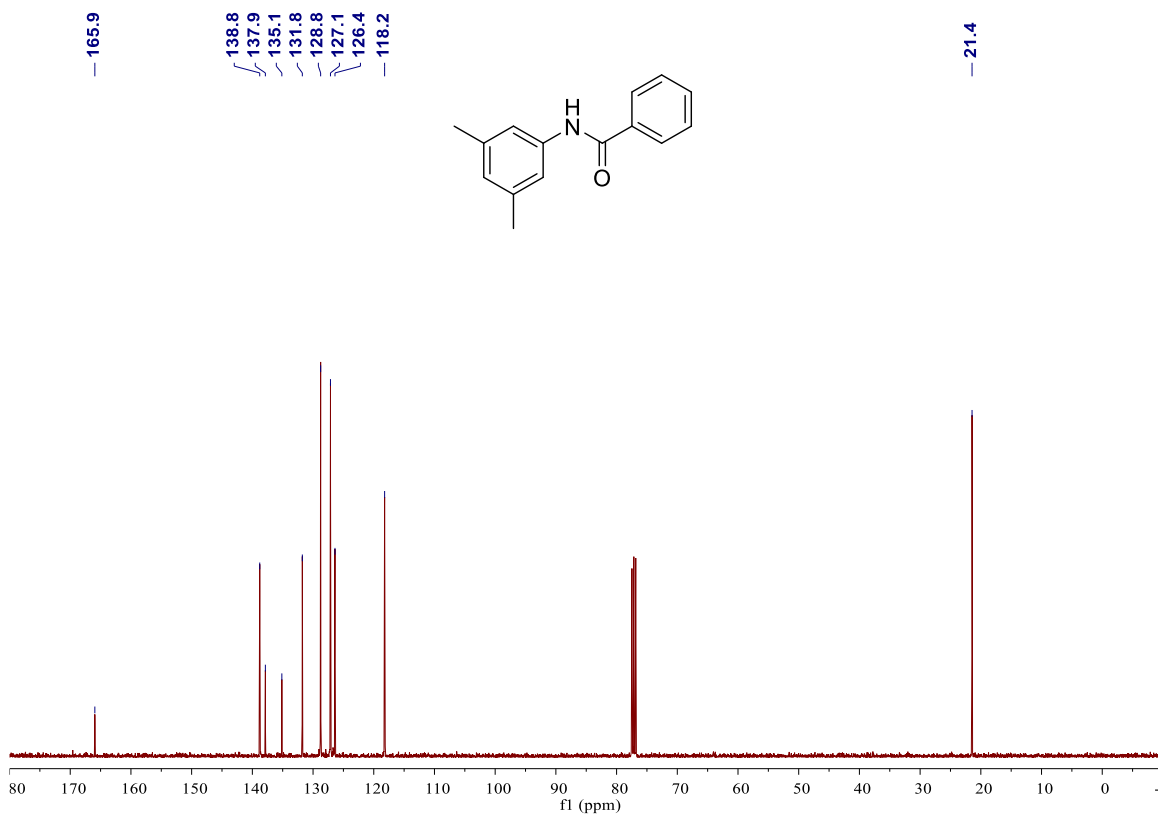

<sup>13</sup>C NMR spectrum for compound **3z** (CDCl<sub>3</sub>)

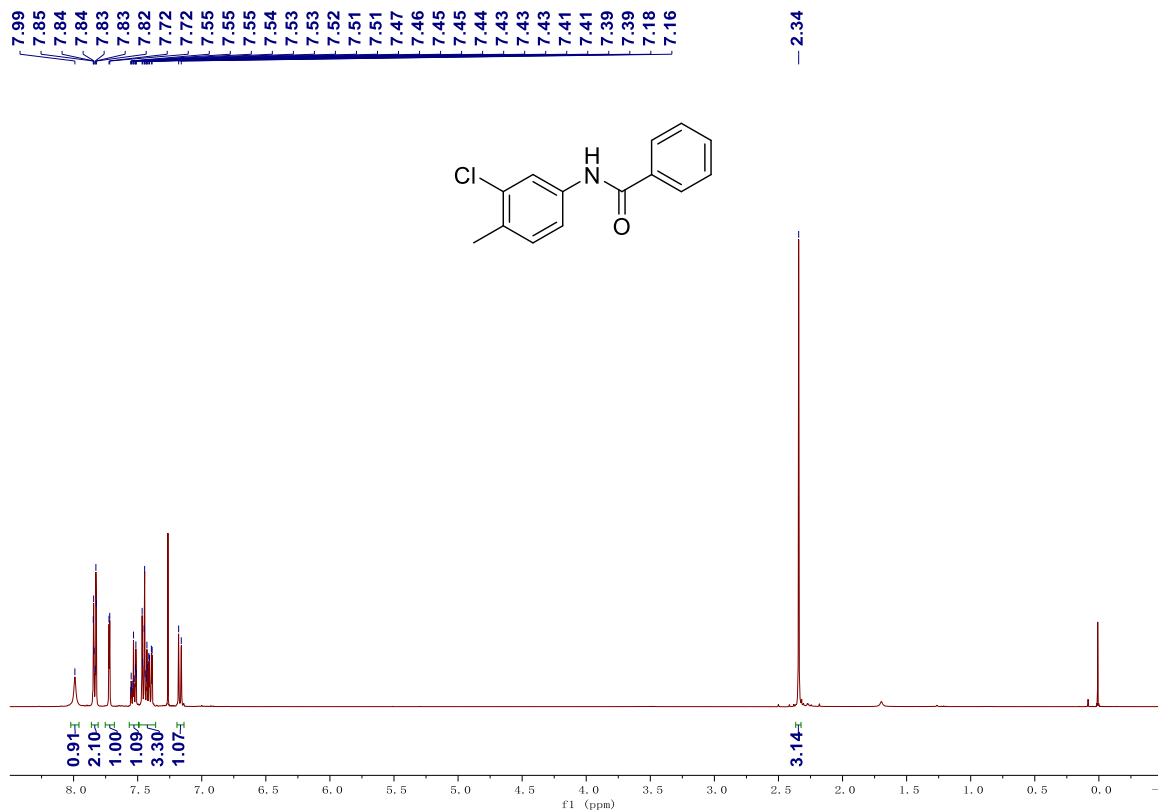

<sup>1</sup>H NMR spectrum for compound 3aa (CDCl<sub>3</sub>)

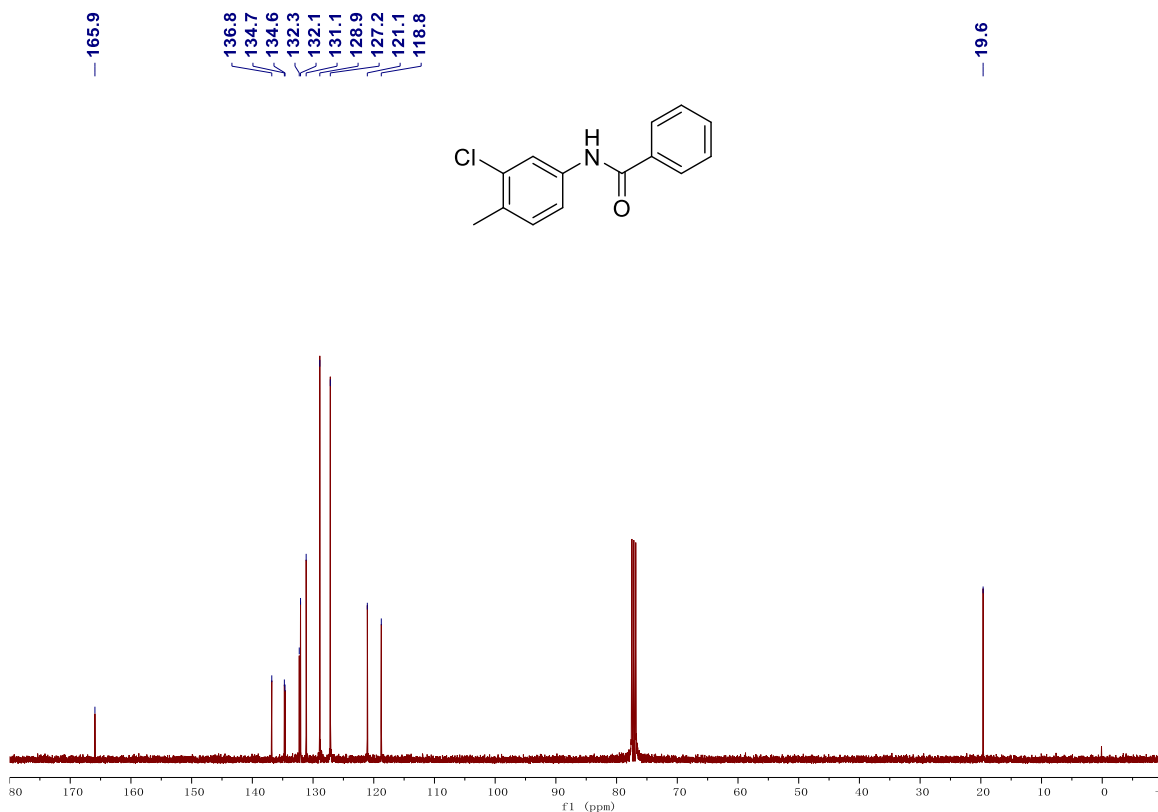

<sup>13</sup>C NMR spectrum for compound 3aa (CDCl<sub>3</sub>)

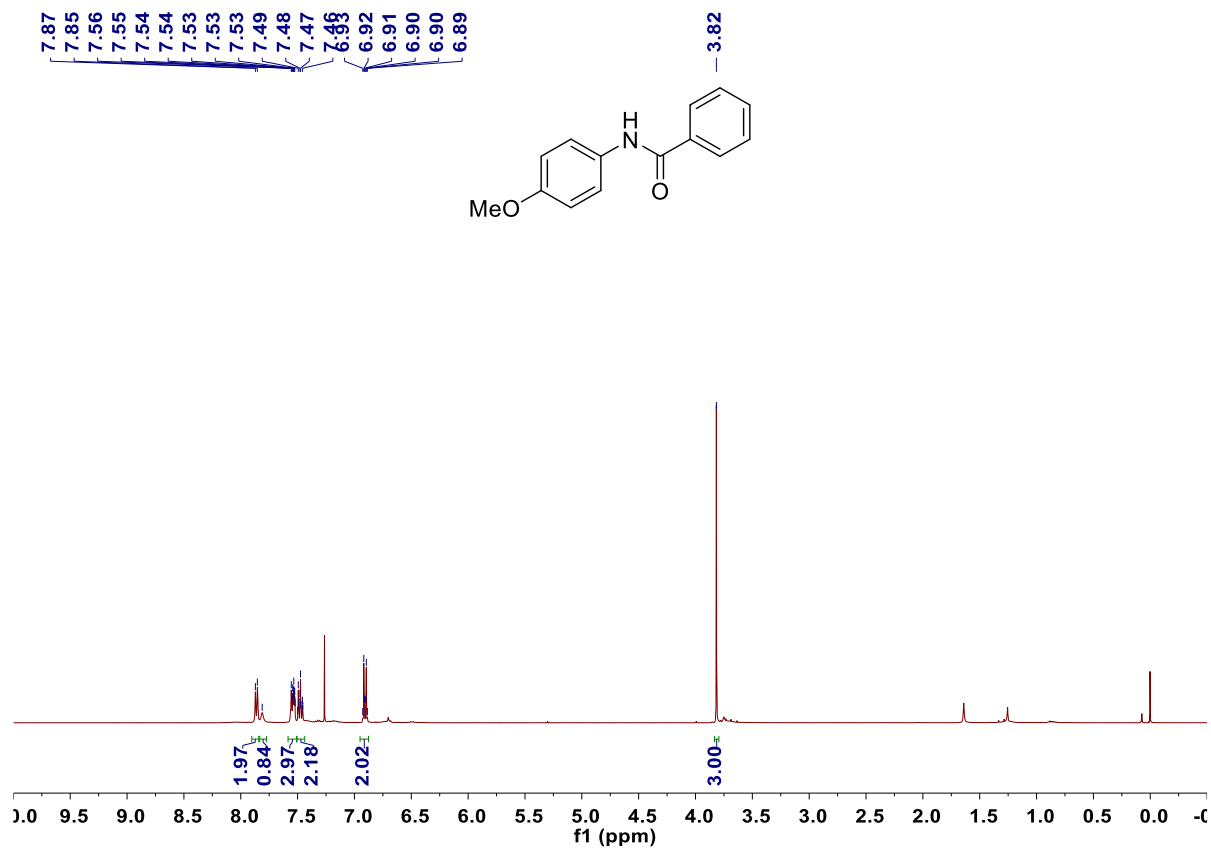

<sup>1</sup>H NMR spectrum for compound **3ab** (CDCl<sub>3</sub>)

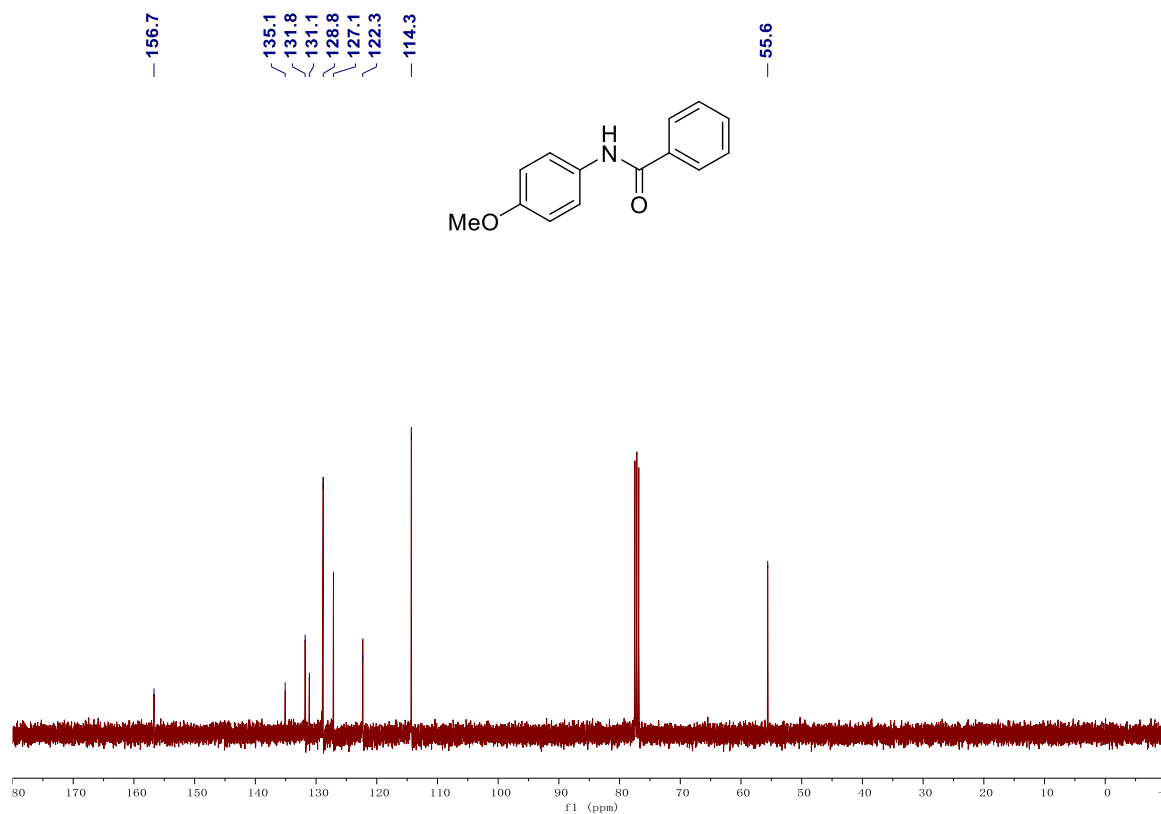

<sup>13</sup>C NMR spectrum for compound **3ab** (CDCl<sub>3</sub>)

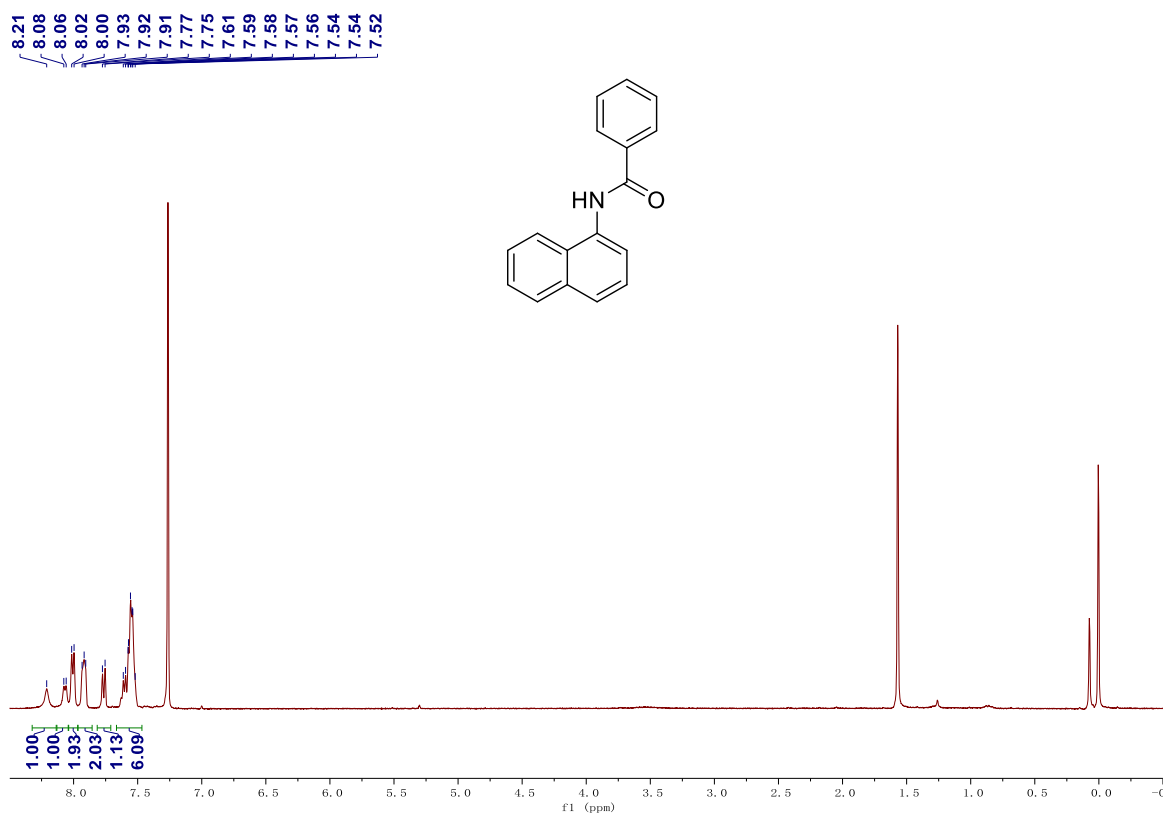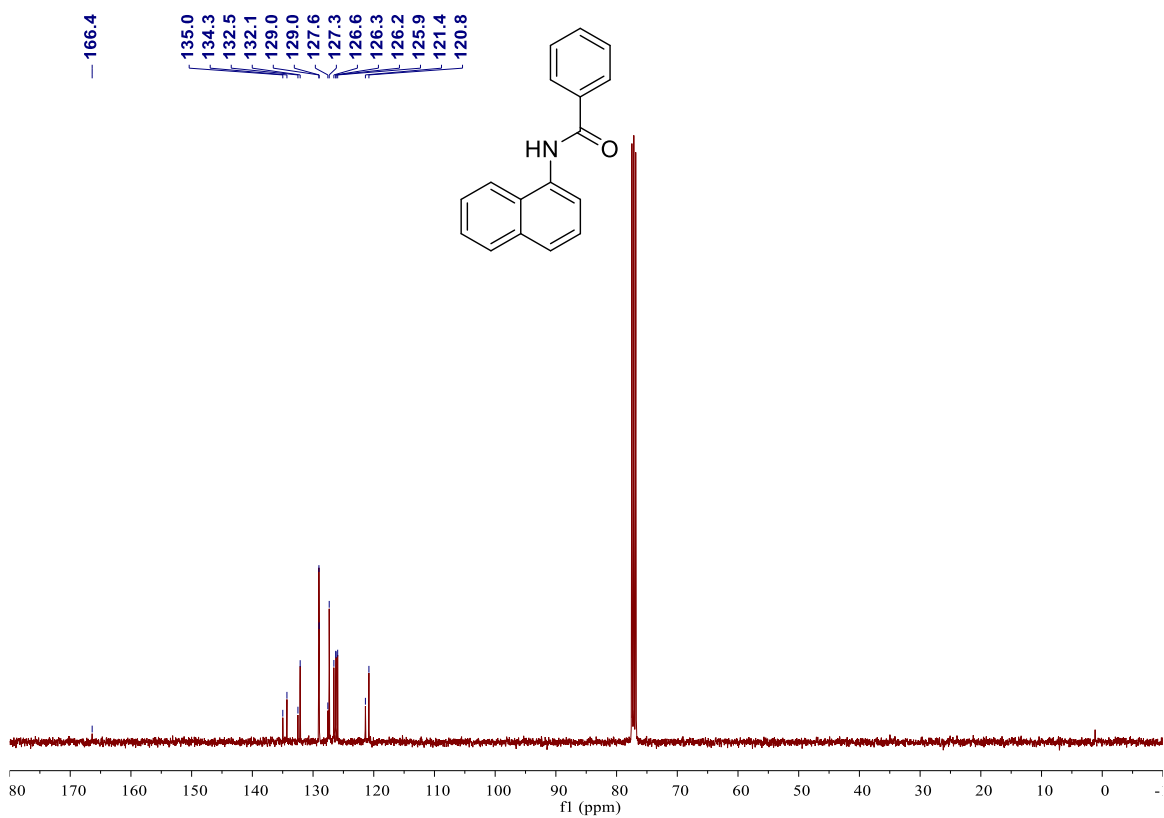

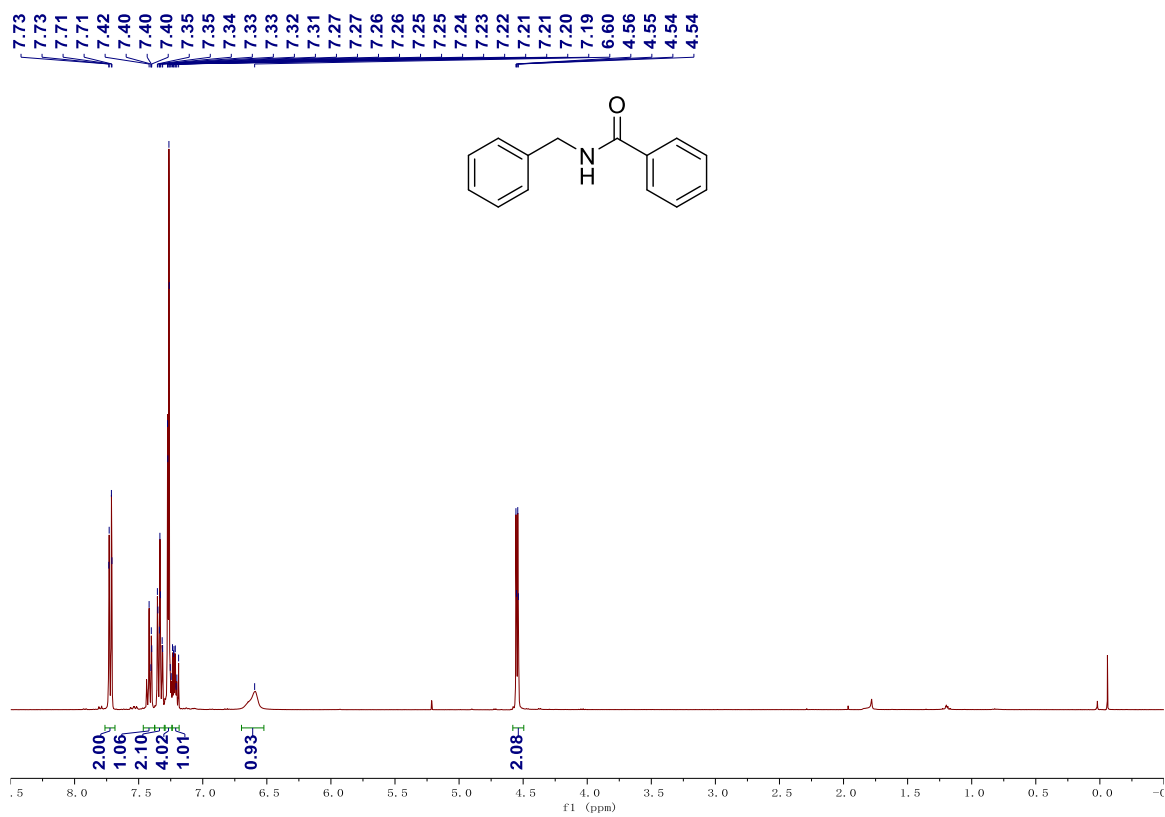

<sup>1</sup>H NMR spectrum for compound **3ad** (CDCl<sub>3</sub>)

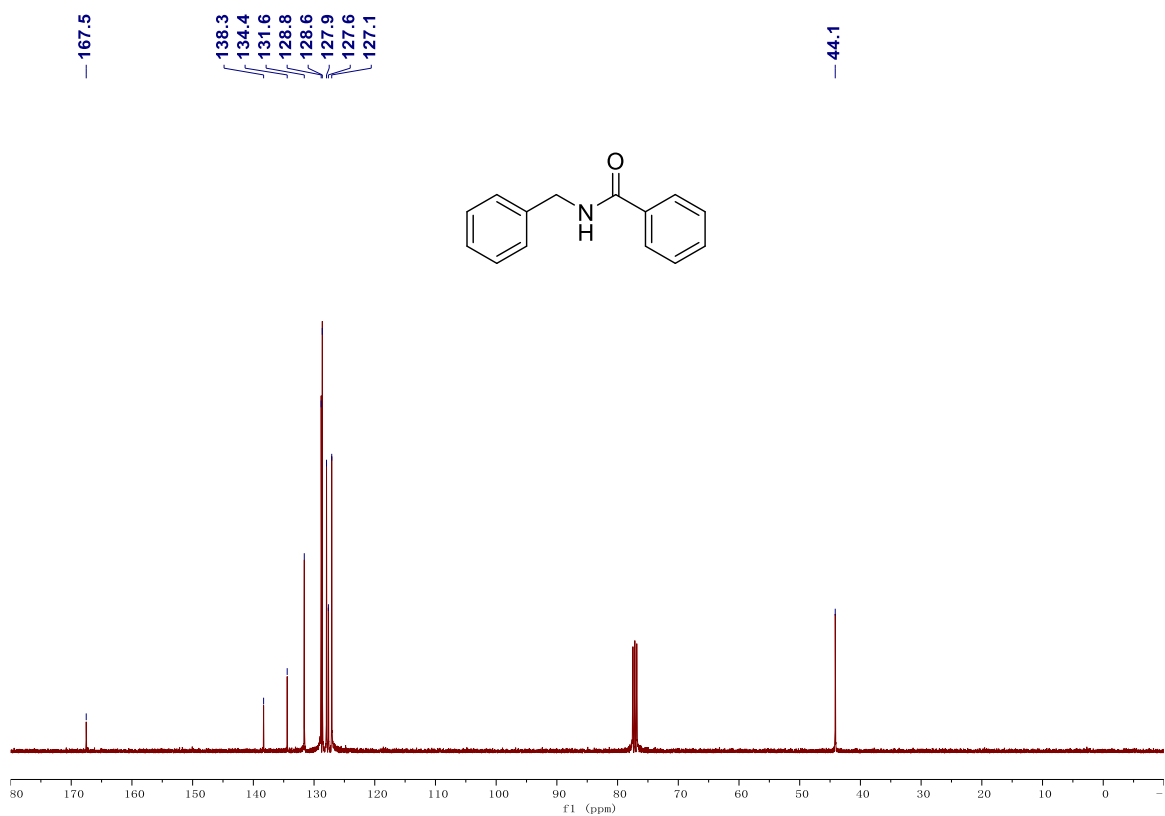

<sup>13</sup>C NMR spectrum for compound **3ad** (CDCl<sub>3</sub>)

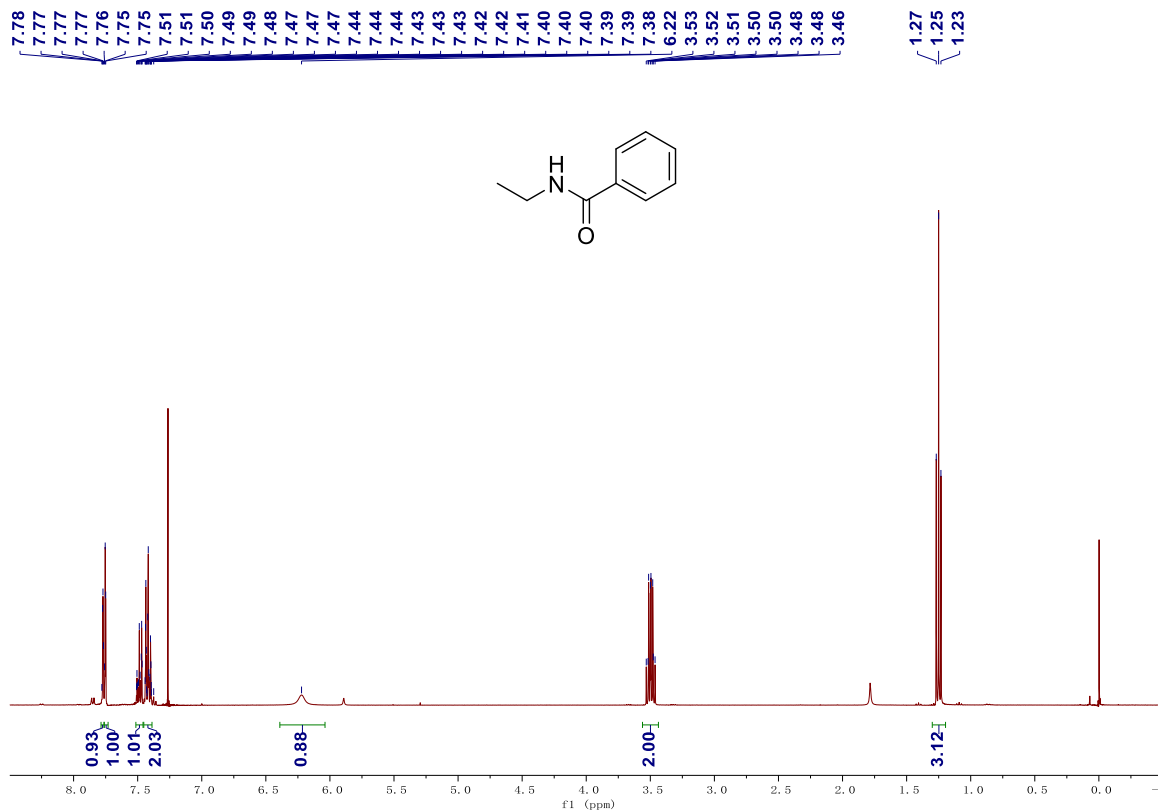

<sup>1</sup>H NMR spectrum for compound 3ae (CDCl<sub>3</sub>)

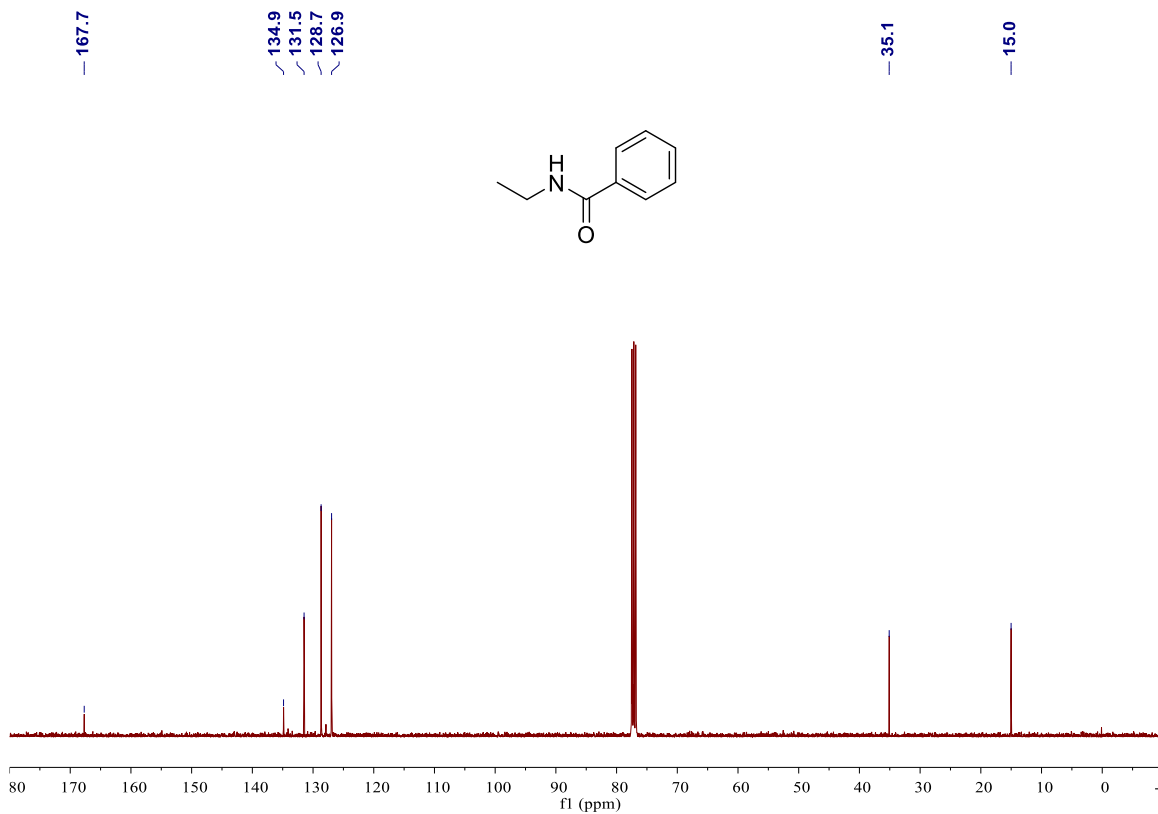

<sup>13</sup>C NMR spectrum for compound 3ae (CDCl<sub>3</sub>)

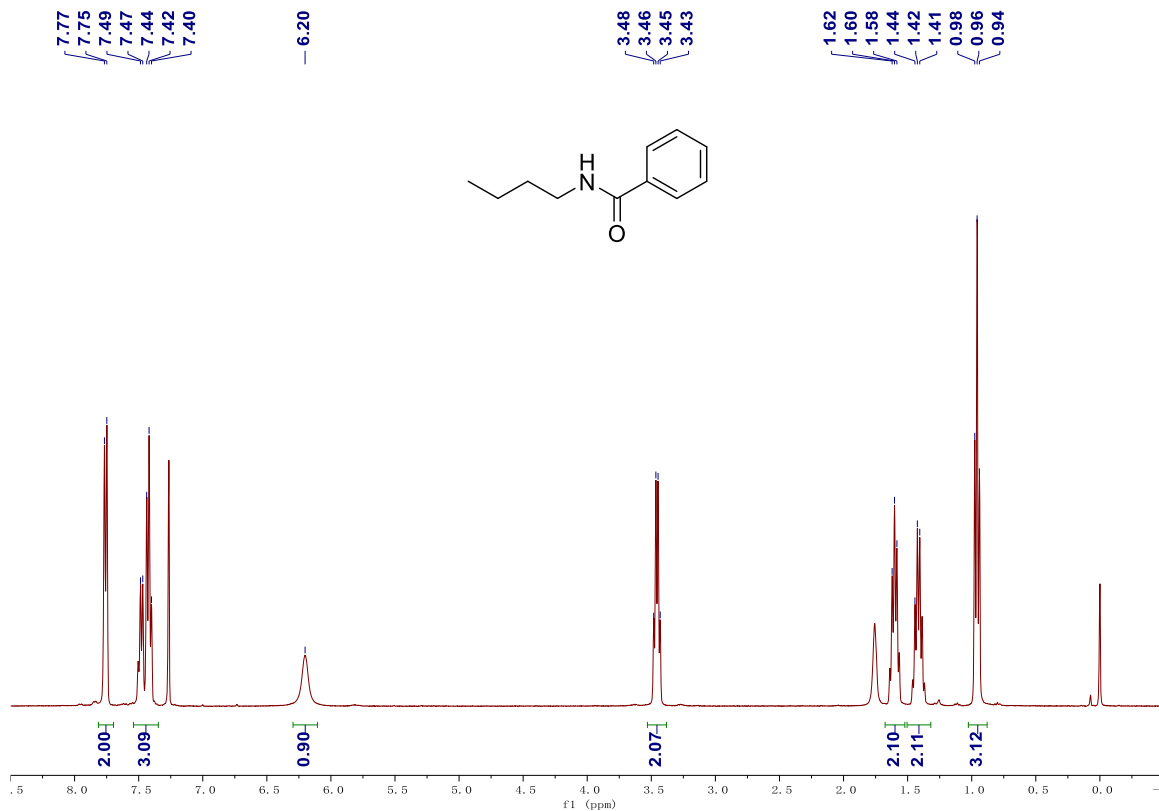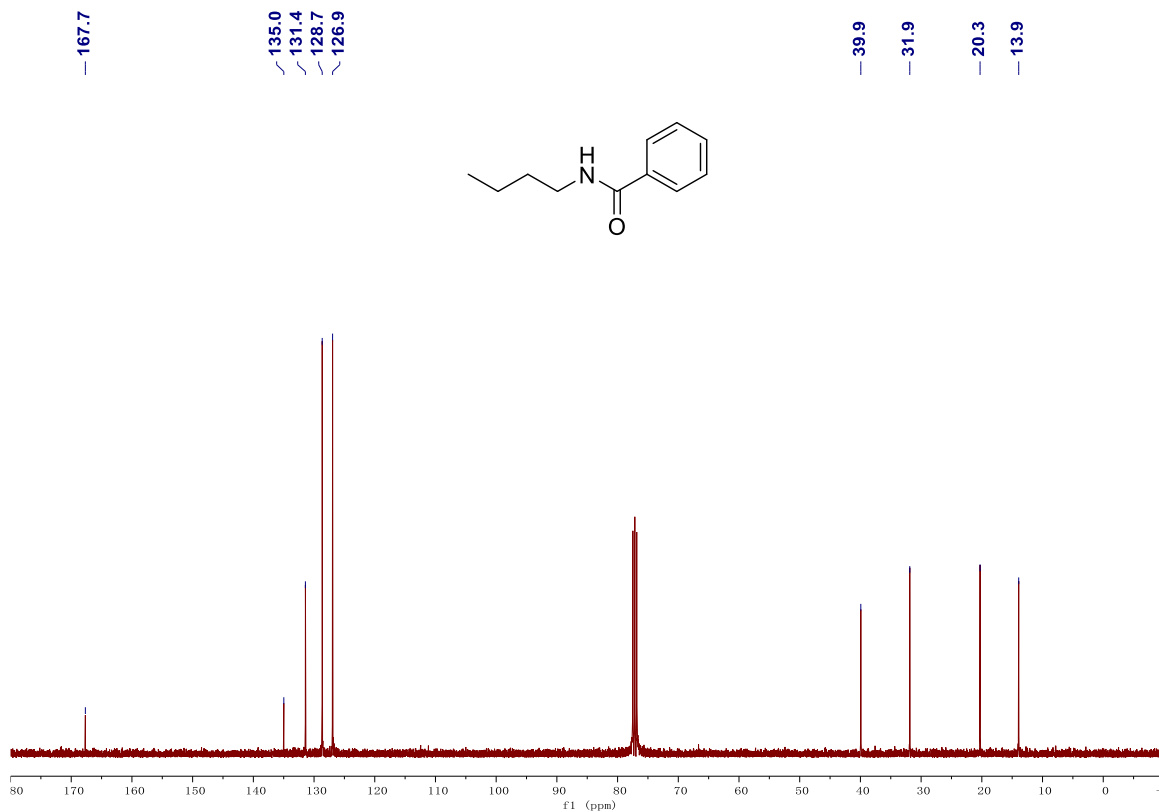



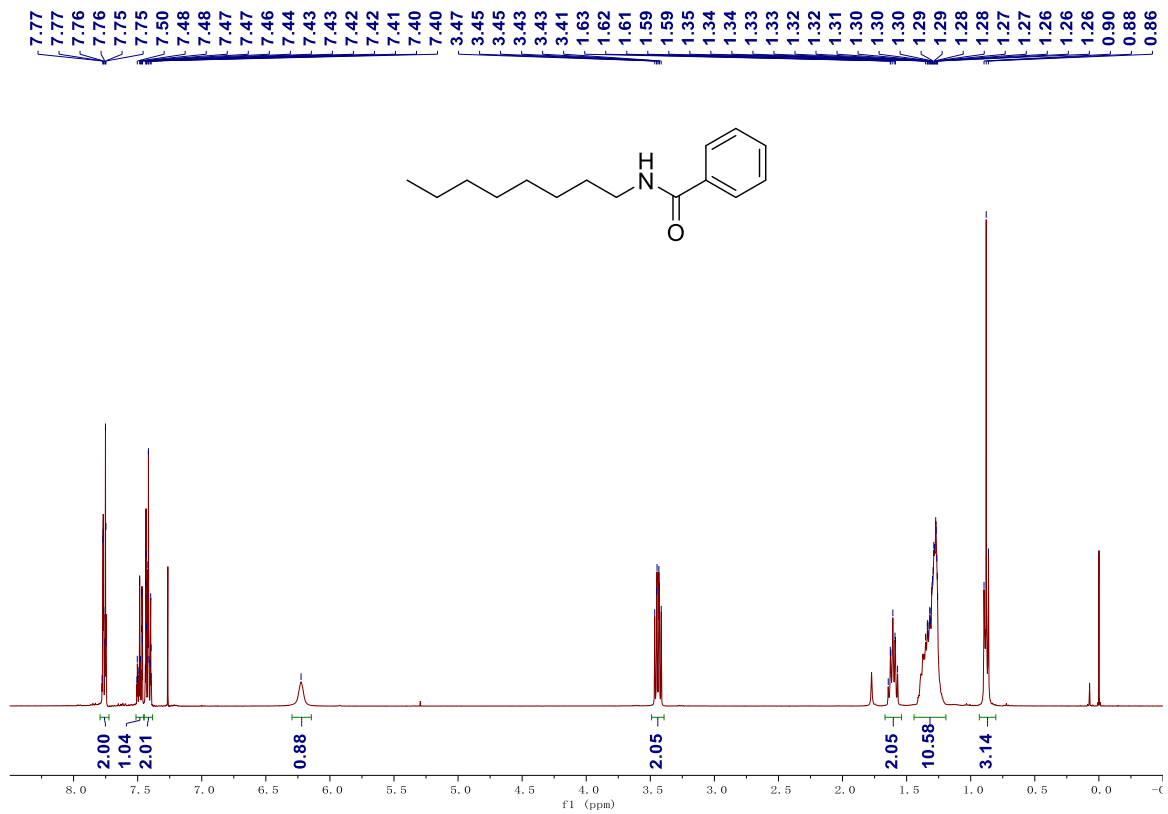

<sup>1</sup>H NMR spectrum for compound **3ag** (CDCl<sub>3</sub>)

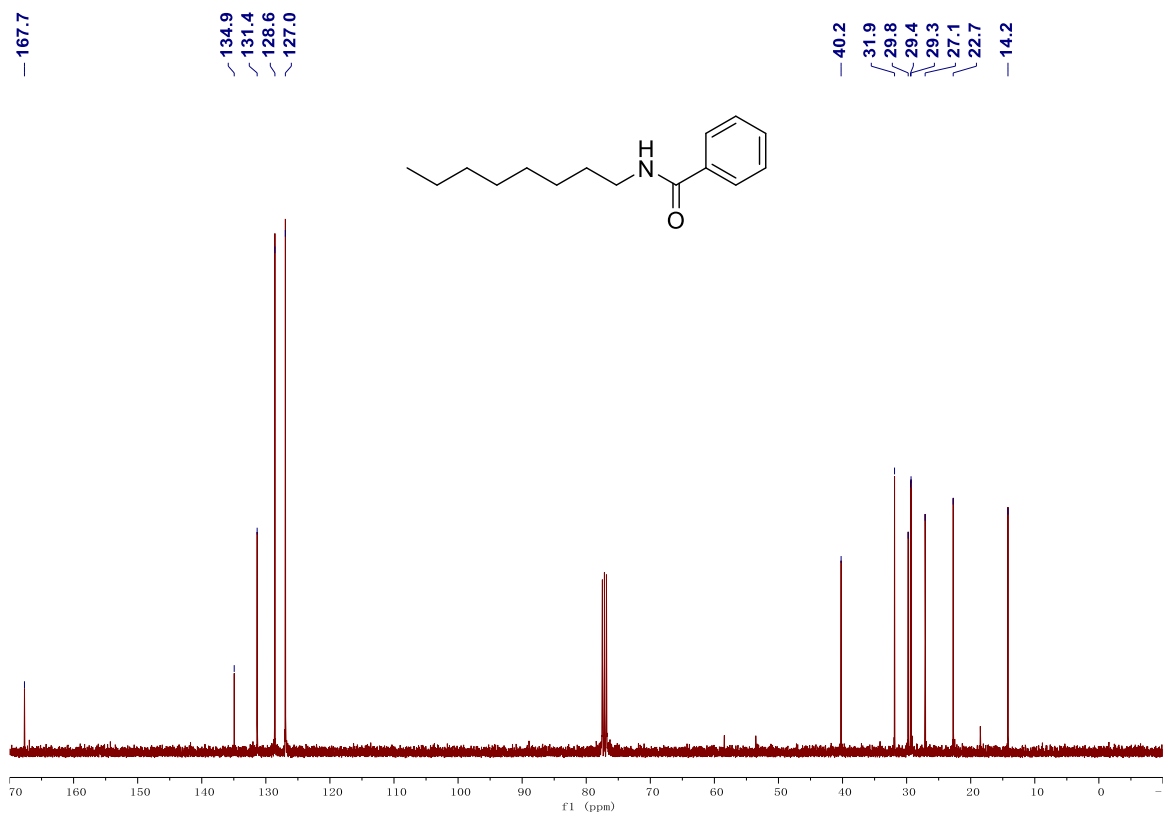

<sup>13</sup>C NMR spectrum for compound **3ag** (CDCl<sub>3</sub>)

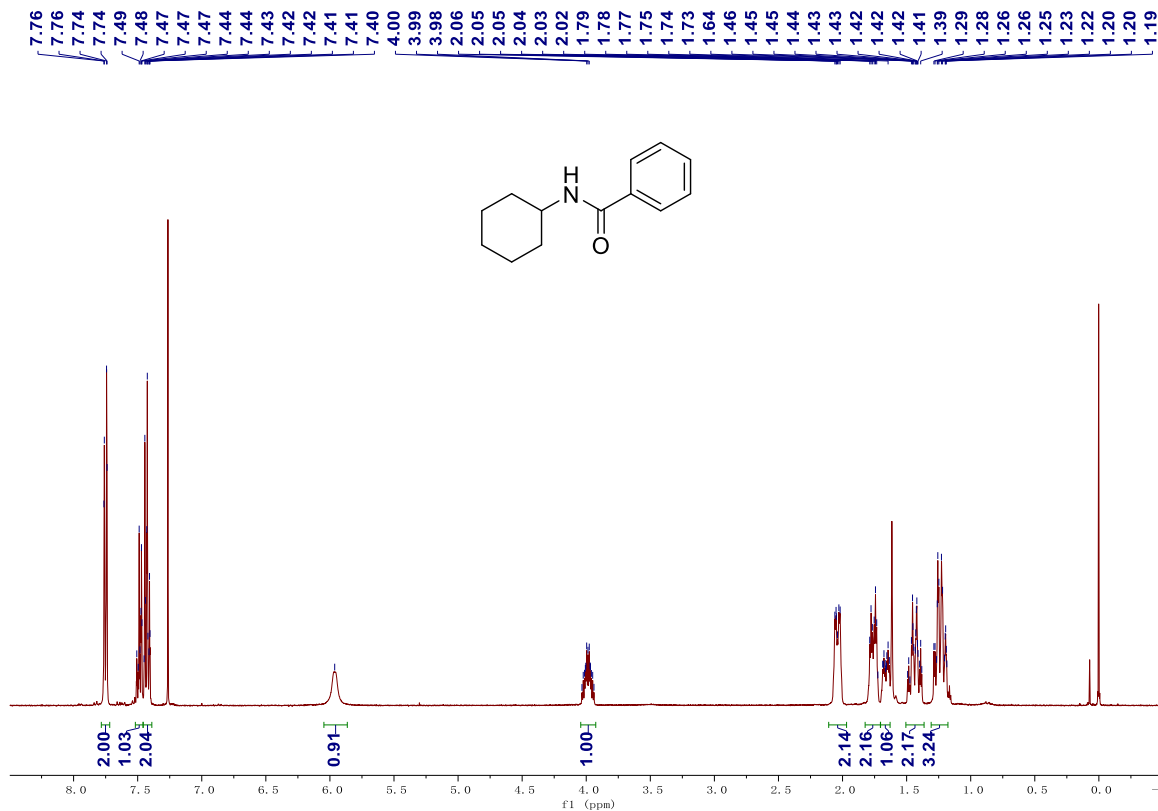

<sup>1</sup>H NMR spectrum for compound 3ah (CDCl<sub>3</sub>)

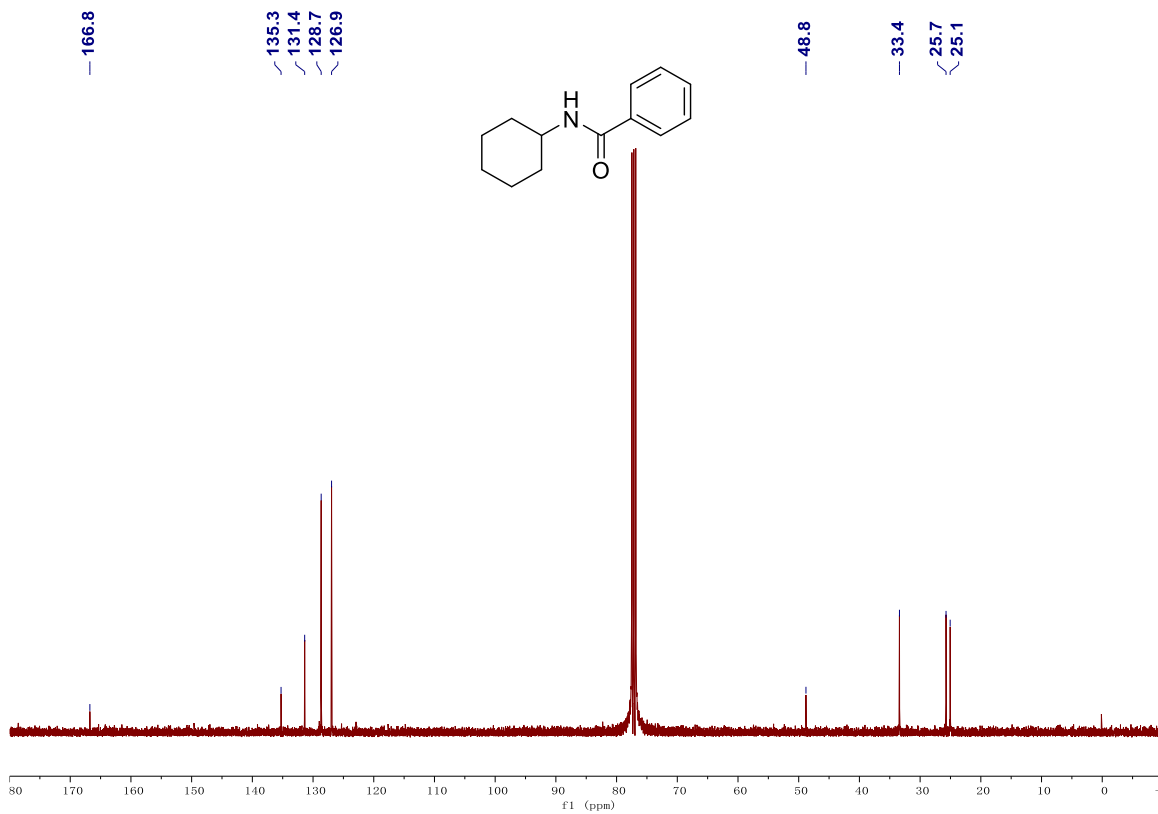

<sup>13</sup>C NMR spectrum for compound 3ah (CDCl<sub>3</sub>)

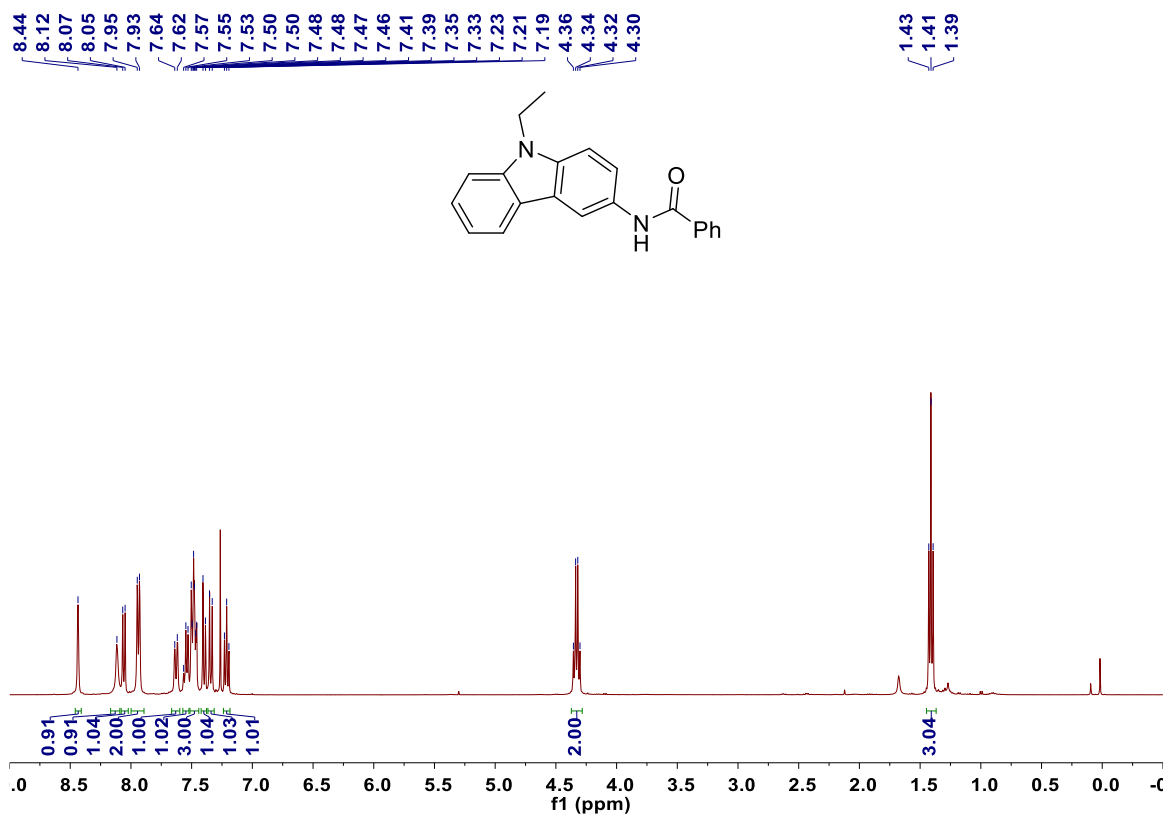

<sup>1</sup>H NMR spectrum for compound 3ai (CDCl<sub>3</sub>)

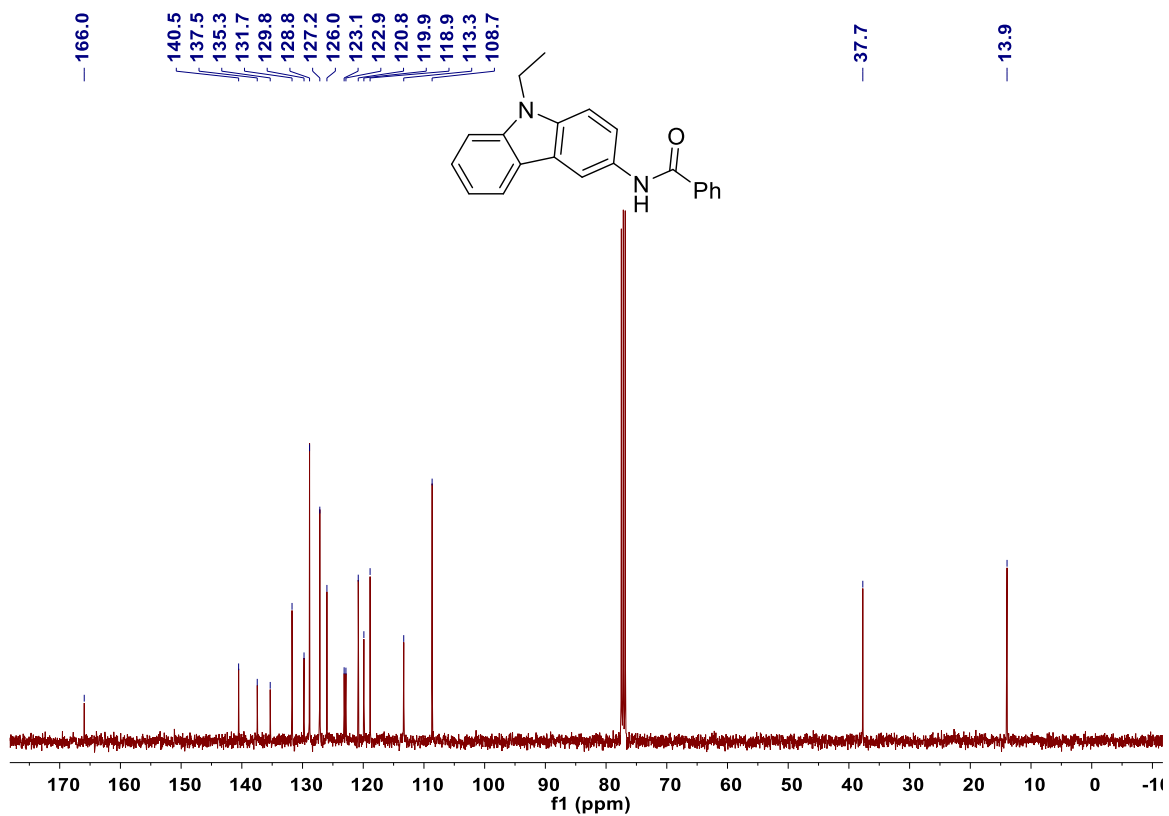

<sup>13</sup>C NMR spectrum for compound 3ai (CDCl<sub>3</sub>)

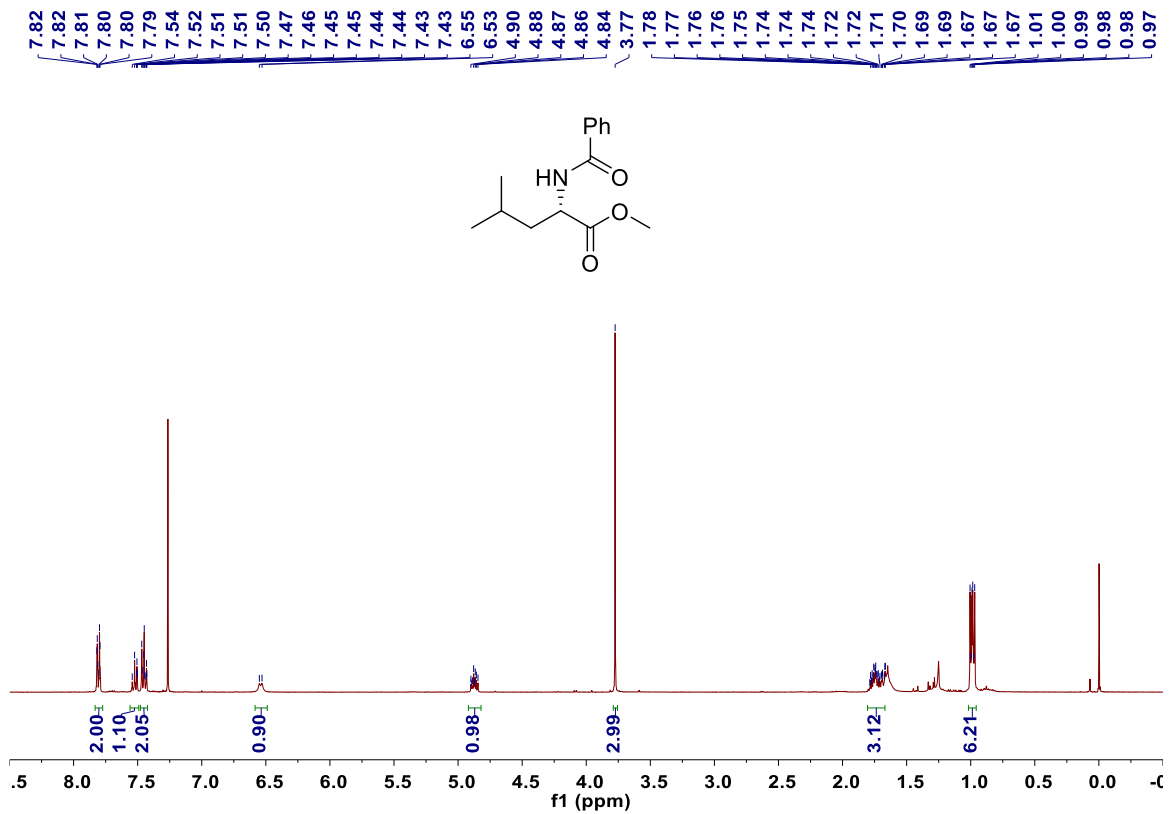

<sup>1</sup>H NMR spectrum for compound 3aj (CDCl<sub>3</sub>)

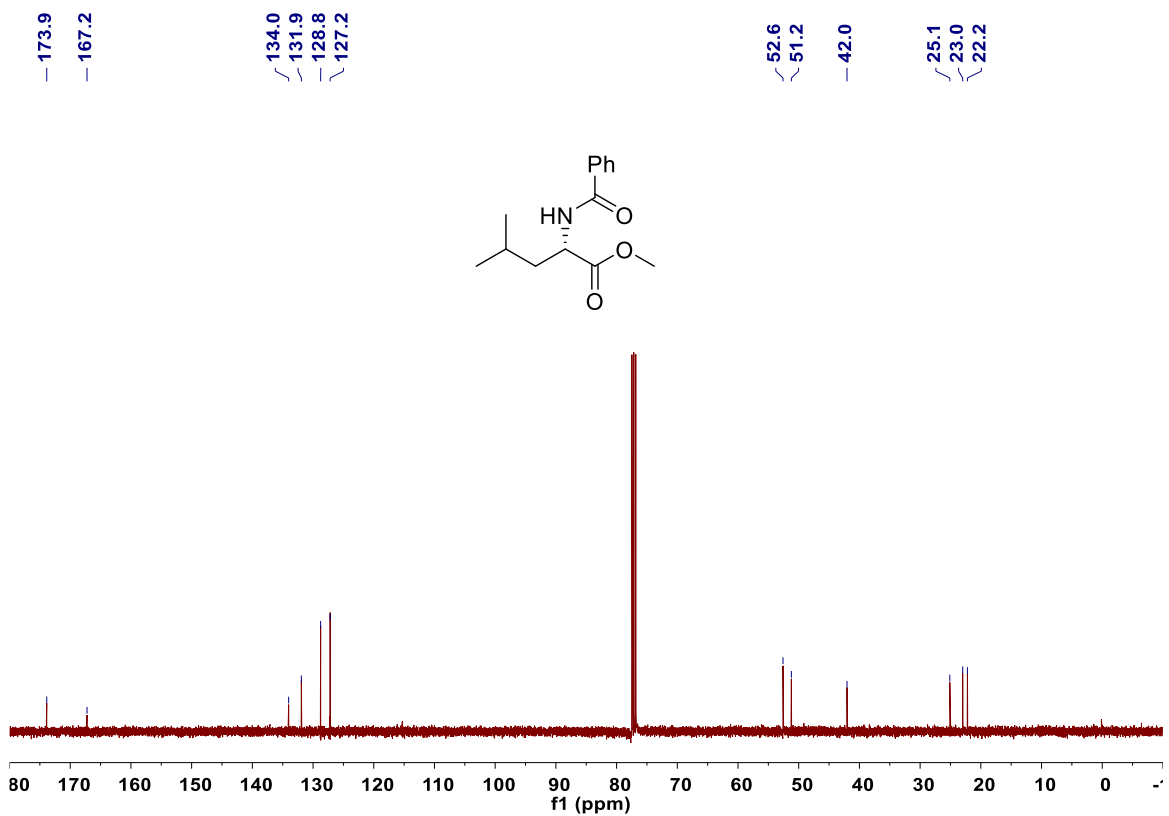

<sup>13</sup>C NMR spectrum for compound 3aj (CDCl<sub>3</sub>)

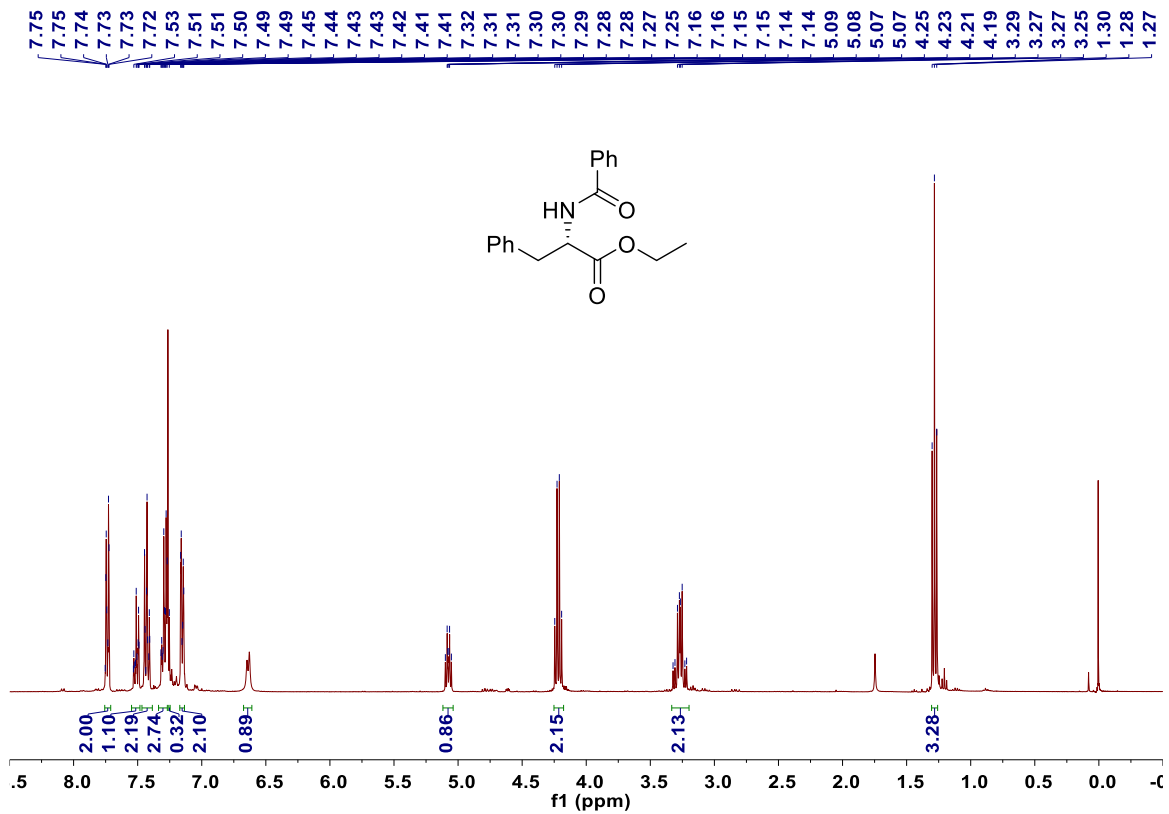

<sup>1</sup>H NMR spectrum for compound 3ak (CDCl<sub>3</sub>)

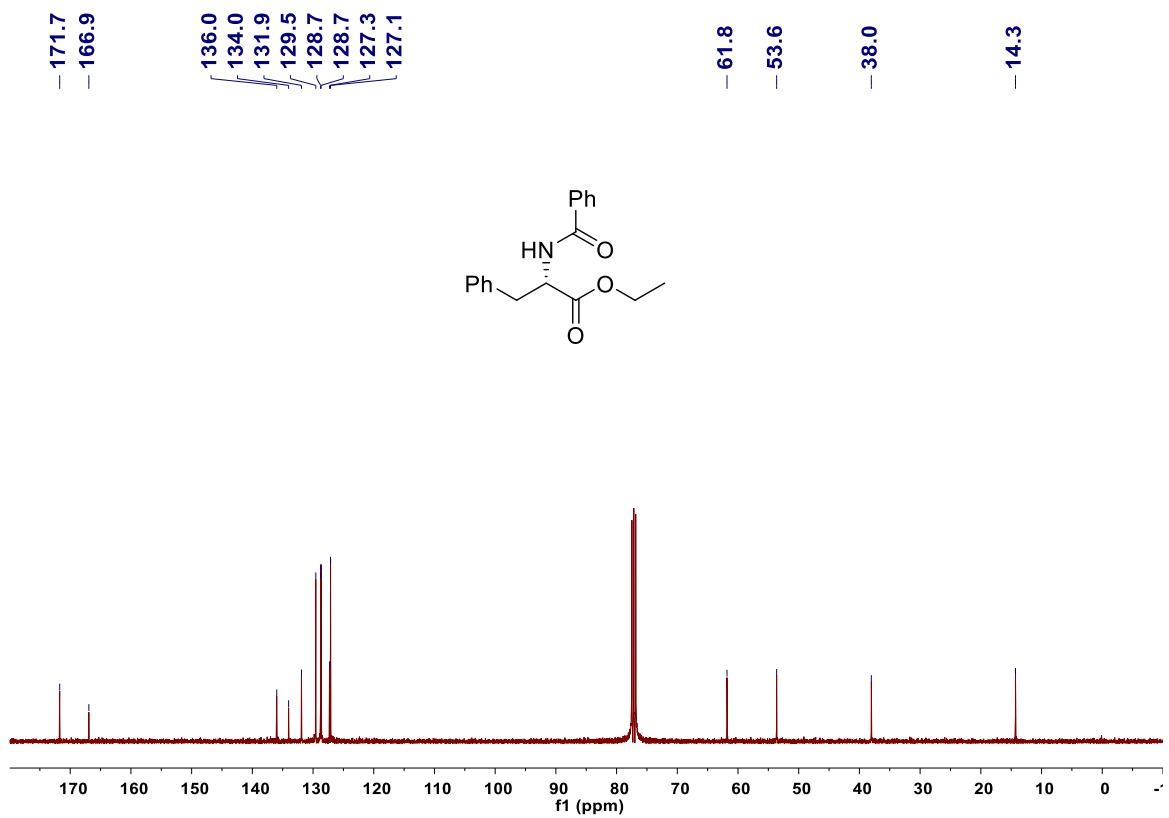

<sup>13</sup>C NMR spectrum for compound 3ak (CDCl<sub>3</sub>)
